# Supplementary material for: Tumor mutational burden assessment in non-small-cell lung cancer samples: results from the TMB2 harmonization project comparing three NGS panels
Source: J Immunother Cancer. 2021 May 7;9(5):e001904. doi: 10.1136/jitc-2020-001904 (PMC8108670; doi:10.1136/jitc-2020-001904)
Supplement: Supplementary data [file jitc-2020-001904supp002.xlsx]

## Sheet: TSO500 N=104
SUPPLEMENTARY TABLE S1. SEQUENCING RESULTS AND TMB DETERMINED WITH THE TWO NGS PANELS UNDER STUDY AND THE REFERENCE STANDARD METHOD FOUNDATION ONE. COMPARISON OF THE OBTAINED RESULTS AMONG THE THREE METHODS (N=96).
Supplementary Table S1-A: TMB determined with TSO500 (N=104)
#ID	Total TMB TSO500	NON__SYNONYMOUS TMB TSO500
P17011-001-09	3.223	2.417
P17011-001-05	24.996	22.112
P17011-001-21	1.621	0.811
P17011-001-22	30.904	23.693
P17011-001-25	12.839	9.629
P17011-001-29	10.053	8.377
P17011-001-41	10.195	8.626
P17011-001-44	5.498	5.498
P17011-001-45	3.161	2.37
P17011-001-46	14.824	12.707
P17011-001-47	7.052	6.269
P17011-001-48	3.861	2.574
P17011-001-54	7.866	6.293
P17011-001-57	12.571	10.214
P17011-001-180	1.571	1.571
P17011-001-60	6.357	6.357
P17011-001-61	22.084	14.197
P17011-001-182	5.484	5.484
P17011-001-64	13.842	10.585
P17011-001-198	17.236	14.102
P17011-001-03	8.41	6.728
P17011-001-26	5.867	4.889
P17011-001-53	4.713	3.927
P17011-001-67	2.352	2.352
P17011-001-72	3.244	1.622
P17011-001-75	34.795	27.678
P17011-001-185	6.277	5.492
P17011-001-79	41.578	34.518
P17011-001-81	3.9191	3.136
P17011-001-82	21.97	18.047
P17011-001-186	51.646	45.386
P17011-001-83	15.892	12.714
P17011-001-86	18.085	14.153
P17011-001-87	7.053	4.702
P17011-001-187	83.999	71.438
P17011-001-90	10.213	8.642
P17011-001-188	4.719	3.146
P17011-001-92	5.553	3.966
P17011-001-91	9.002	8.184
P17011-001-94	11.947	9.557
P17011-001-96	1.584	0
P17011-001-102	0.787	0.787
P17011-001-103	12.583	11.797
P17011-001-110	61.712	47.687
P17011-001-111	4.752	4.752
P17011-001-115	3.929	2.357
P17011-001-116	2.372	1.581
P17011-001-117	3.15	3.15
P17011-001-118	9.487	7.906
P17011-001-121	6.334	5.542
P17011-001-123	13.334	8.628
P17011-001-128	15.47	13.027
P17011-001-129	10.244	7.88
P17011-001-130	36.238	29.796
P17011-001-132	15.338	11.301
P17011-001-133	7.946	7.151
P17011-001-140	10.995	9.304
P17011-001-141	3.142	1.273
P17011-001-142	43.011	33.273
P17011-001-144	6.22	4.443
P17011-001-153	2.354	2.354
P17011-001-155	74.559	61.217
P17011-001-154	24.345	19.633
P17011-001-161	2.358	1.572
P17011-001-163	27.466	24.327
P17011-001-164	1.573	1.573
P17011-001-165	7.071	6.285
P17011-001-172	0.786	0.786
P17011-001-167	13.365	10.221
P17011-001-168	3.923	1.569
P17011-001-169	4.72	3.93
P17011-001-170	21.998	18.07
P17011-001-179	8.636	7.851
P17011-001-02	8.614	6.264
P17011-001-10	16.451	13.318
P17011-001-13	4.711	3.141
P17011-001-14	19.426	14.57
P17011-001-17	0.784	0
P17011-001-18	6.282	6.282
P17011-001-23	7.831	7.048
P17011-001-28	3.927	2.356
P17011-001-31	13.348	10.992
P17011-001-32	5.496	3.141
P17011-001-34	10.249	7.884
P17011-001-35	54.843	43.091
P17011-001-40	10.205	8.635
P17011-001-42	10.189	7.054
P17011-001-49	8.628	4.706
P17011-001-52	13.349	9.423
P17011-001-55	3.136	1.568
P17011-001-58	10.217	7.073
P17011-001-59	9.388	7.041
P17011-001-62	7.843	3.921
P17011-001-66	11.777	9.422
P17011-001-30	9.434	8.648
P17011-001-68	7.827	5.479
P17011-001-70	13.354	13.354
P17011-001-74	7.847	6.278
P17011-001-78	1.567	0
P17011-001-85	17.286	11
P17011-001-88	9.487	7.906
P17011-001-89	1.566	1.566
P17011-001-97	8.621	7.054
P17011-001-98	21.929	15.664

## Sheet: OTML N=104
Supplementary Table S1-B: TMB determined with OTML (N=104)
#ID	Total TMB OTML
P17011-001-09	3.38039
P17011-001-05	34.4199
P17011-001-21	10.1492
P17011-001-22	31.8085
P17011-001-25	10.9002
P17011-001-29	8.38335
P17011-001-41	10.1951
P17011-001-44	3.36993
P17011-001-46	10.0763
P17011-001-47	3.3705
P17011-001-48	8.42625
P17011-001-54	5.87446
P17011-001-57	10.0853
P17011-001-180	5.88899
P17011-001-60	2.52259
P17011-001-61	18.4769
P17011-001-182	7.55857
P17011-001-64	11.7319
P17011-001-198	14.2874
P17011-001-03	13.434
P17011-001-26	6.73237
P17011-001-53	5.04748
P17011-001-67	3.36185
P17011-001-75	27.7502
P17011-001-185	4.20525
P17011-001-79	32.9669
P17011-001-81	1.6801
P17011-001-82	22.6997
P17011-001-186	40.3391
P17011-001-83	17.6735
P17011-001-86	15.9707
P17011-001-87	5.89491
P17011-001-187	59.7904
P17011-001-90	15.1048
P17011-001-188	10.1599
P17011-001-92	5.0887
P17011-001-91	9.31414
P17011-001-94	13.5209
P17011-001-96	5.07193
P17011-001-103	14.3438
P17011-001-110	45.1822
P17011-001-111	8.44937
P17011-001-115	5.91716
P17011-001-116	4.23151
P17011-001-117	2.5462
P17011-001-118	12.7624
P17011-001-121	5.08546
P17011-001-123	11.7661
P17011-001-128	17.7557
P17011-001-129	16.9573
P17011-001-130	20.2766
P17011-001-132	11.8209
P17011-001-133	9.26008
P17011-001-140	5.98097
P17011-001-141	0
P17011-001-142	27.9886
P17011-001-144	53.5552
P17011-001-153	3.35639
P17011-001-155	55.4958
P17011-001-154	23.536
P17011-001-161	3.37967
P17011-001-163	13.4917
P17011-001-164	6.74136
P17011-001-165	16.8387
P17011-001-172	6.72667
P17011-001-167	21.3006
P17011-001-168	5.10514
P17011-001-170	17.8599
P17011-001-171	349.207
P17011-001-179	13.2184
P17011-001-02	9.29803
P17011-001-10	20.2958
P17011-001-13	6.7161
P17011-001-14	14.2524
P17011-001-17	2.54487
P17011-001-18	16.8747
P17011-001-23	4.20799
P17011-001-28	6.76332
P17011-001-31	19.3441
P17011-001-32	9.21125
P17011-001-33	5.02507
P17011-001-34	15.4365
P17011-001-35	50.4505
P17011-001-40	8.41222
P17011-001-42	8.39228
P17011-001-49	7.59262
P17011-001-50	13.646
P17011-001-52	12.5956
P17011-001-55	23.4684
P17011-001-58	5.04065
P17011-001-59	9.25785
P17011-001-62	13.4519
P17011-001-66	13.4453
P17011-001-30	9.24089
P17011-001-68	15.9728
P17011-001-70	9.27551
P17011-001-74	7.558
P17011-001-77	273.625
P17011-001-78	5.05559
P17011-001-85	13.5327
P17011-001-88	44.9091
P17011-001-89	5.87709
P17011-001-97	8.36093
P17011-001-98	22.6715

## Sheet: Foundation One N=110
Supplementary Table S1-C: TMB determined with FO/F1CDx (N=110)
#ID	FO Total TMB
P17011-001-09	1
P17011-001-05	33
P17011-001-21	2
P17011-001-22	23
P17011-001-25	18
P17011-001-29	22
P17011-001-41	11
P17011-001-44	6
P17011-001-45	Cannot be determined
P17011-001-46	10
P17011-001-47	5
P17011-001-48	4
P17011-001-54	4
P17011-001-57	11
P17011-001-180	3
P17011-001-60	4
P17011-001-61	21
P17011-001-182	11
P17011-001-64	24
P17011-001-198	18
P17011-001-03	18
P17011-001-26	5
P17011-001-53	2
P17011-001-67	5
P17011-001-72	Cannot be determined
P17011-001-75	32
P17011-001-185	5
P17011-001-79	43
P17011-001-81	6
P17011-001-82	22
P17011-001-186	44
P17011-001-83	18
P17011-001-86	18
P17011-001-87	4
P17011-001-187	74
P17011-001-90	6
P17011-001-188	6
P17011-001-92	7
P17011-001-91	11
P17011-001-94	17
P17011-001-96	2
P17011-001-102	Cannot be determined
P17011-001-103	13
P17011-001-110	56
P17011-001-111	6
P17011-001-115	5
P17011-001-116	2
P17011-001-117	3
P17011-001-118	8
P17011-001-121	4
P17011-001-123	11
P17011-001-128	18
P17011-001-129	11
P17011-001-130	32
P17011-001-132	11
P17011-001-133	8
P17011-001-140	16
P17011-001-141	0
P17011-001-142	46
P17011-001-144	4
P17011-001-153	2
P17011-001-155	71
P17011-001-154	31
P17011-001-161	1
P17011-001-163	13
P17011-001-164	1
P17011-001-165	9
P17011-001-172	8
P17011-001-167	16
P17011-001-168	5
P17011-001-169	Cannot be determined
P17011-001-170	15
P17011-001-171	4
P17011-001-179	10
P17011-001-02	6
P17011-001-10	10
P17011-001-13	5
P17011-001-14	15
P17011-001-17	4
P17011-001-18	9
P17011-001-23	5
P17011-001-28	6
P17011-001-31	10
P17011-001-32	0
P17011-001-33	4
P17011-001-34	11
P17011-001-35	39
P17011-001-40	5
P17011-001-42	9
P17011-001-43	Cannot be determined
P17011-001-49	6
P17011-001-50	8
P17011-001-52	9
P17011-001-55	15
P17011-001-58	8
P17011-001-59	8
P17011-001-62	8
P17011-001-66	14
P17011-001-27	Cannot be determined
P17011-001-30	13
P17011-001-68	10
P17011-001-70	10
P17011-001-74	11
P17011-001-77	1
P17011-001-78	25
P17011-001-85	25
P17011-001-88	6
P17011-001-89	13
P17011-001-97	9
P17011-001-98	16

## Sheet: Common N=96
Supplementary Table S1-D: Comparison of the determined TMB among the three methods with common samples (N=96)
ID	TMB FO	Total TMB TSO500	Total TMB OTML
P17011-001-09	1	3.223	3.38039
P17011-001-05	33	24.996	34.4199
P17011-001-21	2	1.621	10.1492
P17011-001-25	18	12.839	10.9002
P17011-001-29	22	10.053	8.38335
P17011-001-41	11	10.195	10.1951
P17011-001-44	6	5.498	3.36993
P17011-001-46	10	14.824	10.0763
P17011-001-47	5	7.052	3.3705
P17011-001-48	4	3.861	8.42625
P17011-001-54	4	7.866	5.87446
P17011-001-57	11	12.571	10.0853
P17011-001-180	3	1.571	5.88899
P17011-001-60	4	6.357	2.52259
P17011-001-61	21	22.084	18.4769
P17011-001-182	11	5.484	7.55857
P17011-001-64	24	13.842	11.7319
P17011-001-198	18	17.236	14.2874
P17011-001-03	18	8.41	13.434
P17011-001-26	5	5.867	6.73237
P17011-001-53	2	4.713	5.04748
P17011-001-67	5	2.352	3.36185
P17011-001-75	32	34.795	27.7502
P17011-001-185	5	6.277	4.20525
P17011-001-79	43	41.578	32.9669
P17011-001-81	6	3.9191	1.6801
P17011-001-82	22	21.97	22.6997
P17011-001-186	44	51.646	40.3391
P17011-001-83	18	15.892	17.6735
P17011-001-86	18	18.085	15.9707
P17011-001-87	4	7.053	5.89491
P17011-001-187	74	83.999	59.7904
P17011-001-90	6	10.213	15.1048
P17011-001-188	6	4.719	10.1599
P17011-001-92	7	5.553	5.0887
P17011-001-91	11	9.002	9.31414
P17011-001-94	17	11.947	13.5209
P17011-001-96	2	1.584	5.07193
P17011-001-103	13	12.583	14.3438
P17011-001-110	56	61.712	45.1822
P17011-001-111	6	4.752	8.44937
P17011-001-115	5	3.929	5.91716
P17011-001-116	2	2.372	4.23151
P17011-001-117	3	3.15	2.5462
P17011-001-118	8	9.487	12.7624
P17011-001-121	4	6.334	5.08546
P17011-001-123	11	13.334	11.7661
P17011-001-128	18	15.47	17.7557
P17011-001-129	11	10.244	16.9573
P17011-001-130	32	36.238	20.2766
P17011-001-132	11	15.338	11.8209
P17011-001-133	8	7.946	9.26008
P17011-001-140	16	10.995	5.98097
P17011-001-141	0	3.142	0
P17011-001-142	46	43.011	27.9886
P17011-001-153	2	2.354	3.35639
P17011-001-155	71	74.559	55.4958
P17011-001-154	31	24.345	23.536
P17011-001-161	1	2.358	3.37967
P17011-001-163	13	27.466	13.4917
P17011-001-164	1	1.573	6.74136
P17011-001-165	9	7.071	16.8387
P17011-001-172	8	0.786	6.72667
P17011-001-167	16	13.365	21.3006
P17011-001-168	5	3.923	5.10514
P17011-001-179	10	8.636	13.2184
P17011-001-02	6	8.614	9.29803
P17011-001-10	10	16.451	20.2958
P17011-001-13	5	4.711	6.7161
P17011-001-14	15	19.426	14.2524
P17011-001-17	4	0.784	2.54487
P17011-001-18	9	6.282	16.8747
P17011-001-23	5	7.831	4.20799
P17011-001-28	6	3.927	6.76332
P17011-001-31	10	13.348	19.3441
P17011-001-32	0	5.496	9.21125
P17011-001-34	11	10.249	15.4365
P17011-001-35	39	54.843	50.4505
P17011-001-40	5	10.205	8.41222
P17011-001-42	9	10.189	8.39228
P17011-001-49	6	8.628	7.59262
P17011-001-52	9	13.349	12.5956
P17011-001-55	15	3.136	23.4684
P17011-001-58	8	10.217	5.04065
P17011-001-59	8	9.388	9.25785
P17011-001-62	8	7.843	13.4519
P17011-001-66	14	11.777	13.4453
P17011-001-30	13	9.434	9.24089
P17011-001-68	10	7.827	15.9728
P17011-001-70	10	13.354	9.27551
P17011-001-74	11	7.847	7.558
P17011-001-78	25	1.567	5.05559
P17011-001-85	25	17.286	13.5327
P17011-001-89	13	1.566	5.87709
P17011-001-97	9	8.621	8.36093
P17011-001-98	16	21.929	22.6715

## Sheet: Samples evaluated per assay
Supplementary Table S1-E: Samples evaluated per assay
#ID	Foundation One	TruSight Oncology 500	Oncomine Tumor Mutational Load
P17011-001-09	Described	Described	Described
P17011-001-05	Described	Described	Described
P17011-001-21	Described	Described	Described
P17011-001-22	Described	Described	High deamination
P17011-001-25	Described	Described	Described
P17011-001-29	Described	Described	Described
P17011-001-41	Described	Described	Described
P17011-001-44	Described	Described	Described
P17011-001-45	Insufficient sample quality	Described	Not described
P17011-001-46	Described	Described	Described
P17011-001-47	Described	Described	Described
P17011-001-48	Described	Described	Described
P17011-001-54	Described	Described	Described
P17011-001-57	Described	Described	Described
P17011-001-180	Described	Described	Described
P17011-001-60	Described	Described	Described
P17011-001-61	Described	Described	Described
P17011-001-182	Described	Described	Described
P17011-001-64	Described	Described	Described
P17011-001-198	Described	Described	Described
P17011-001-03	Described	Described	Described
P17011-001-26	Described	Described	Described
P17011-001-53	Described	Described	Described
P17011-001-67	Described	Described	Described
P17011-001-72	Insufficient sample quality	Described	Not described
P17011-001-75	Described	Described	Described
P17011-001-185	Described	Described	Described
P17011-001-79	Described	Described	Described
P17011-001-81	Described	Described	Described
P17011-001-82	Described	Described	Described
P17011-001-186	Described	Described	Described
P17011-001-83	Described	Described	Described
P17011-001-86	Described	Described	Described
P17011-001-87	Described	Described	Described
P17011-001-187	Described	Described	Described
P17011-001-90	Described	Described	Described
P17011-001-188	Described	Described	Described
P17011-001-92	Described	Described	Described
P17011-001-91	Described	Described	Described
P17011-001-94	Described	Described	Described
P17011-001-96	Described	Described	Described
P17011-001-102	Insufficient sample quality	Described	Not described
P17011-001-103	Described	Described	Described
P17011-001-110	Described	Described	Described
P17011-001-111	Described	Described	Described
P17011-001-115	Described	Described	Described
P17011-001-116	Described	Described	Described
P17011-001-117	Described	Described	Described
P17011-001-118	Described	Described	Described
P17011-001-121	Described	Described	Described
P17011-001-123	Described	Described	Described
P17011-001-128	Described	Described	Described
P17011-001-129	Described	Described	Described
P17011-001-130	Described	Described	Described
P17011-001-132	Described	Described	Described
P17011-001-133	Described	Described	Described
P17011-001-140	Described	Described	Described
P17011-001-141	Described	Described	Described
P17011-001-142	Described	Described	Described
P17011-001-144	Described	Described	High deamination
P17011-001-153	Described	Described	Described
P17011-001-155	Described	Described	Described
P17011-001-154	Described	Described	Described
P17011-001-161	Described	Described	Described
P17011-001-163	Described	Described	Described
P17011-001-164	Described	Described	Described
P17011-001-165	Described	Described	Described
P17011-001-172	Described	Described	Described
P17011-001-167	Described	Described	Described
P17011-001-168	Described	Described	Described
P17011-001-169	Insufficient sample quality	Described	Not described
P17011-001-170	Described	Described	High deamination
P17011-001-171	Described	Not described	Described
P17011-001-179	Described	Described	Described
P17011-001-02	Described	Described	Described
P17011-001-10	Described	Described	Described
P17011-001-13	Described	Described	Described
P17011-001-14	Described	Described	Described
P17011-001-17	Described	Described	Described
P17011-001-18	Described	Described	Described
P17011-001-23	Described	Described	Described
P17011-001-28	Described	Described	Described
P17011-001-31	Described	Described	Described
P17011-001-32	Described	Described	Described
P17011-001-33	Described	Not described	Described
P17011-001-34	Described	Described	Described
P17011-001-35	Described	Described	Described
P17011-001-40	Described	Described	Described
P17011-001-42	Described	Described	Described
P17011-001-43	Insufficient sample quality	Not described	Not described
P17011-001-49	Described	Described	Described
P17011-001-50	Described	Not described	Described
P17011-001-52	Described	Described	Described
P17011-001-55	Described	Described	Described
P17011-001-58	Described	Described	Described
P17011-001-59	Described	Described	Described
P17011-001-62	Described	Described	Described
P17011-001-66	Described	Described	Described
P17011-001-27	Insufficient sample quality	Not described	Not described
P17011-001-30	Described	Described	Described
P17011-001-68	Described	Described	Described
P17011-001-70	Described	Described	Described
P17011-001-74	Described	Described	Described
P17011-001-77	Described	Not described	Described
P17011-001-78	Described	Described	Described
P17011-001-85	Described	Described	Described
P17011-001-88	Described	Described	High deamination
P17011-001-89	Described	Described	Described
P17011-001-97	Described	Described	Described
P17011-001-98	Described	Described	Described

## Sheet: Descriptive analysis of results
Supplementary Table S1-F: Descriptive analysis of the data obtained with the three methods
		TSO500	Oncomine TML	FoundationOne
Type		Numeric (double)	Numeric (double)	Numeric (byte)
Range		[0.784 , 83.999]	[0 , 59.79]	[0 , 74]
Unique values		96	96	32
Units		0.0001	1e-08	1
Missing		0/99	0/99	3/99
Mean		13.3682	13.1148	13.5833
Std. Dev		15.0717	11.226	13.8394
Percentiles	0.1	2.354	3.37967	2
	0.25	4.7355	5.89195	5
(median)	0.5	8.819	9.6952	10
	0.75	14.333	15.9717	16.5
	0.9	27.466	23.536	32

## Sheet: CCC
Supplementary Table S1-G: Evaluation of the concordance correlation coefficient (Bland Altman)
Test1 (FO) vs Test2 (TSO500)	Rho c	0.933
	SE (rho c)	0.013
	Obs	96
	[95% CI]	0.908-0.959
	P value	0
	CI type	Asymptotic
	Difference average	0.215
	SD	5.283
	95% limits of agreement	0.43
Test1 (FO) vs Test3 (OTML)	Rho c	0.881
	SE (rho c)	0.021
	Obs	96
	[95% CI]	0.840-0.922
	P value	0.922
	CI type	asymptotic
	Difference average	0.469
	SD	6.131
	95% limits of agreement	0.937
Test2 (TSO500) vs Test3 (OTML)	Rho c	0.886
	SE (rho c)	0.018
	Obs	96
	[95% CI]	0.851-0.920
	P value	0
	CI type	asymptotic
	Difference average	0.253
	SD	6.354
	95% limits of agreement	0.507
