# Supplementary material for: Tumor mutational burden assessment in non-small-cell lung cancer samples: results from the TMB2 harmonization project comparing three NGS panels
Source: J Immunother Cancer. 2021 May 7;9(5):e001904. doi: 10.1136/jitc-2020-001904 (PMC8108670; doi:10.1136/jitc-2020-001904)
Supplement: Supplementary data [file jitc-2020-001904supp003.xlsx]

## Sheet: IHC PD-L1 and TMB x3
SUPPLEMENTARY TABLE S2. TMB DETERMINATION WITH THE THREE NGS PANELS USED IN DIFFERENT PD-L1 EXPRESSING SAMPLES
Supplementary Table S2-A. Tumor expression of PD-L1 measured by IHC and values of total TMB calculated with the three panels for each sample.
ID	Foundation One (Total TMB)	TSO500 Institution 1 (total TMB)	Oncomine TML Institution 2 (Total TMB)	PDL1 22c3 (%)
P17011-001-02	6	8.614	9.29803	0
P17011-001-03	18	8.41	13.434	0
P17011-001-05	33	24.996	34.4199	0
P17011-001-09	1	3.223	3.38039	0
P17011-001-10	10	16.451	20.2958	0
P17011-001-110	56	61.712	45.1822	0
P17011-001-115	5	3.929	5.91716	0
P17011-001-117	3	3.15	2.5462	0
P17011-001-121	4	6.334	5.08546	0
P17011-001-128	18	15.47	17.7557	0
P17011-001-132	11	15.338	11.8209	0
P17011-001-133	8	7.946	9.26008	0
P17011-001-14	15	19.426	14.2524	0
P17011-001-141	0	3.142	0	0
P17011-001-154	31	24.345	23.536	0
P17011-001-155	71	74.559	55.4958	0
P17011-001-161	1	2.358	3.37967	0
P17011-001-163	13	27.466	13.4917	0
P17011-001-164	1	1.573	6.74136	0
P17011-001-165	9	7.071	16.8387	0
P17011-001-167	16	13.365	21.3006	0
P17011-001-168	5	3.923	5.10514	0
P17011-001-18	9	6.282	16.8747	0
P17011-001-180	3	1.571	5.88899	0
P17011-001-185	5	6.277	4.20525	0
P17011-001-187	74	83.999	59.7904	0
P17011-001-188	6	4.719	10.1599	0
P17011-001-198	18	17.236	14.2874	0
P17011-001-21	2	1.621	10.1492	0
P17011-001-30	13	9.434	9.24089	0
P17011-001-35	39	54.843	50.4505	0
P17011-001-40	5	10.205	8.41222	0
P17011-001-46	10	14.824	10.0763	0
P17011-001-47	5	7.052	3.3705	0
P17011-001-48	4	3.861	8.42625	0
P17011-001-49	6	8.628	7.59262	0
P17011-001-53	2	4.713	5.04748	0
P17011-001-55	15	3.136	23.4684	0
P17011-001-60	4	6.357	2.52259	0
P17011-001-61	21	22.084	18.4769	0
P17011-001-64	24	13.842	11.7319	0
P17011-001-67	5	2.352	3.36185	0
P17011-001-74	11	7.847	7.558	0
P17011-001-75	32	34.795	27.7502	0
P17011-001-79	43	41.578	32.9669	0
P17011-001-81	6	3.9191	1.6801	0
P17011-001-82	22	21.97	22.6997	0
P17011-001-83	18	15.892	17.6735	0
P17011-001-85	25	17.286	13.5327	0
P17011-001-86	18	18.085	15.9707	0
P17011-001-89	13	1.566	5.87709	0
P17011-001-90	6	10.213	15.1048	0
P17011-001-91	11	9.002	9.31414	0
P17011-001-92	7	5.553	5.0887	0
P17011-001-96	2	1.584	5.07193	0
P17011-001-118	8	9.487	12.7624	1
P17011-001-123	11	13.334	11.7661	1
P17011-001-142	46	43.011	27.9886	1
P17011-001-17	4	0.784	2.54487	1
P17011-001-179	10	8.636	13.2184	1
P17011-001-26	5	5.867	6.73237	1
P17011-001-41	11	10.195	10.1951	1
P17011-001-182	11	5.484	7.55857	2
P17011-001-54	4	7.866	5.87446	2
P17011-001-31	10	13.348	19.3441	5
P17011-001-44	6	5.498	3.36993	5
P17011-001-94	17	11.947	13.5209	5
P17011-001-111	6	4.752	8.44937	10
P17011-001-116	2	2.372	4.23151	10
P17011-001-129	11	10.244	16.9573	10
P17011-001-140	16	10.995	5.98097	10
P17011-001-186	44	51.646	40.3391	10
P17011-001-32	0	5.496	9.21125	10
P17011-001-66	14	11.777	13.4453	10
P17011-001-68	10	7.827	15.9728	10
P17011-001-28	6	3.927	6.76332	15
P17011-001-103	13	12.583	14.3438	20
P17011-001-97	9	8.621	8.36093	20
P17011-001-130	32	36.238	20.2766	30
P17011-001-153	2	2.354	3.35639	30
P17011-001-34	11	10.249	15.4365	30
P17011-001-87	4	7.053	5.89491	30
P17011-001-23	5	7.831	4.20799	40
P17011-001-58	8	10.217	5.04065	40
P17011-001-78	25	1.567	5.05559	40
P17011-001-98	16	21.929	22.6715	40
P17011-001-13	5	4.711	6.7161	60
P17011-001-172	8	0.786	6.72667	60
P17011-001-29	22	10.053	8.38335	70
P17011-001-70	10	13.354	9.27551	70
P17011-001-25	18	12.839	10.9002	80
P17011-001-52	9	13.349	12.5956	80
P17011-001-42	9	10.189	8.39228	90
P17011-001-57	11	12.571	10.0853	90
P17011-001-59	8	9.388	9.25785	90
P17011-001-62	8	7.843	13.4519	100

## Sheet: Demographics
Supplementary Table S2-B. Comparison of the demographic characteristics among the groups of patients with different expression of PD-L1 (N=96).
PDL1 <1% VS PD-L1 ≥1%
PDL1 <1% (N=55)				PDL1 ≥1% (N=41)				Statistic analysis between PD-L1<1% and PD-L1≥1%
								Note: NA and ND values were not included in the statistical analysis
								# Packyear was grouped in <40 and >40 to meet statistical analysis requirements.
								Statistical analyses were performed with Chi Square / F Fisher exact test for categorical data, unpaired t test for continuous data and Log Rank test for survival
Characteristic	N	(%)		Characteristic	N	(%)		Characteristic	N	p value
Total NSCLC cases with PD-L1 expression <1%	55	100		Total NSCLC cases with PD-L1 expression ≥1%	41	100		Total NSCLC cases	96	NA
Gender				Gender				Gender	96	0.2473
Male	45	81.8182		Male	37	90.2439		Male
Female	10	18.1818		Female	4	9.7561		Female
Average age at diagnosis	68.07	NA		Average age at diagnosis	63.17	NA		Age at diagnosis	96	0,011*
Smoking History				Smoking History				Smoking History	89	0.8147
Current smoker	19	34.5455		Current smoker	16	39.0244		Current smoker
Former smoker	23	41.8182		Former smoker	17	41.4634		Former smoker
Never smoker	9	16.3636		Never smoker	5	12.1951		Never smoker
ND	4	7.27273		ND	3	7.31707		ND
Package year group				Package year group				Package year group#	41	0.6777
<10	1	1.81818		<10	1	2.43902		<10
10 to 20	1	1.81818		10 to 20	1	2.43902		10 to 20
20 to 40	7	12.7273		20 to 40	7	17.0732		20 to 40
>40	13	23.6364		>40	10	24.3902		>40
NA	9	16.3636		NA	5	12.1951		NA
ND	24	43.6364		ND	17	41.4634		ND
COPD				COPD				COPD	90	0.5276
Yes	24	43.6364		Yes	15	36.5854		Yes
No	28	50.9091		No	23	56.0976		No
ND	3	5.45455		ND	3	7.31707		ND
Histology				Histology				Histology	96	0,0077*
Adenocarcinoma	43	78.1818		Adenocarcinoma	22	53.6585		Adenocarcinoma
Squamous cell carcinoma	11	20		Squamous cell carcinoma	19	46.3415		Squamous cell carcinoma
Large cell carcinoma	1	1.81818		Large cell carcinoma	0	0		Large cell carcinoma
Stage				Stage				Stage	96	0.6215
I	31	56.3636		I	20	48.7805		I
II	15	27.2727		II	15	36.5854		II
III	9	16.3636		III	6	14.6341		III
EGFR Mutation Status				EGFR Mutation Status				EGFR Mutation Status	94	0.1585
Wild type	41	74.5455		Wild type	35	85.3659		Wild type
Mutant	13	23.6364		Mutant	5	12.1951		Mutant
ND	1	1.81818		ND	1	2.43902		ND
KRAS Mutation Status				KRAS Mutation Status				KRAS Mutation Status	94	0.5618
Wild type	39	70.9091		Wild type	31	75.6098		Wild type
Mutant	15	27.2727		Mutant	9	21.9512		Mutant
ND	1	1.81818		ND	1	2.43902		ND
ROS1 Mutation Status				ROS1 Mutation Status				ROS1 Mutation Status	94	0.656
Wild type	50	90.9091		Wild type	36	87.8049		Wild type
Mutant	4	7.27273		Mutant	4	9.7561		Mutant
ND	1	1.81818		ND	1	2.43902		ND
ALK Mutation Status				ALK Mutation Status				ALK Mutation Status	94	0.9055
Wild type	51	92.7273		Wild type	38	92.6829		Wild type
Mutant	3	5.45455		Mutant	2	4.87805		Mutant
ND	1	1.81818		ND	1	2.43902		ND
Neoadjuvancy				Neoadjuvancy				Neoadjuvancy	90	0.8218
Yes	1	1.81818		Yes	1	2.43902		Yes
No	51	92.7273		No	37	90.2439		No
ND	3	5.45455		ND	3	7.31707		ND
Adjuvancy				Adjuvancy				Adjuvancy	83	0.1308
Yes	10	18.1818		Yes	12	29.2683		Yes
No	39	70.9091		No	22	53.6585		No
ND	6	10.9091		ND	7	17.0732		ND
Exitus				Exitus				Exitus	93	0.7457
Yes	40	72.7273		Yes	29	70.7317		Yes
No	13	23.6364		No	11	26.8293		No
ND	2	3.63636		ND	1	2.43902		ND
Average OS (months)	63	NA		Average OS (months)	72	NA		OS (months)	92	0.4209
Relapse				Relapse				Relapse	79	0.5795
Yes	25	45.4545		Yes	20	48.7805		Yes
No	21	38.1818		No	13	31.7073		No
ND	9	16.3636		ND	8	19.5122		ND
Average PFS (months)	61	NA		Average PFS (months)	66	NA		PFS (months)	78	0.8593
