# Supplementary material for: Tumor mutational burden assessment in non-small-cell lung cancer samples: results from the TMB2 harmonization project comparing three NGS panels
Source: J Immunother Cancer. 2021 May 7;9(5):e001904. doi: 10.1136/jitc-2020-001904 (PMC8108670; doi:10.1136/jitc-2020-001904)
Supplement: Supplementary data [file jitc-2020-001904supp004.xlsx]

## Sheet: TSO500
SUPPLEMENTARY TABLE S3. RESULTS FROM REPRODUCIBILITY ASSAYS: TOTAL TMB RESULTS OBTAINED IN THE INTER-INSTITUTION REPRODUCIBILITY ASSAYS
Supplementary Table S3-A: Reproducibility assay TMB results for TSO500 (N=21) between Institution 1 and Institution 3.
ID	Total TMB TSO500 Institution 1	Total TMB TSO500 Institution 3	Non-synonymous TMB TSO500 Institution 1	Non-synonymous TMB TSO500 Institution 3
P17011-001-29	10.053	11.737	8.377	8.607
P17011-001-41	10.195	10.963	8.626	9.397
P17011-001-44	5.498	5.487	5.498	5.487
P17011-001-46	14.824	14.86	12.707	11.732
P17011-001-48	3.861	5.01	2.574	5.01
P17011-001-54	7.866	7.042	6.293	5.477
P17011-001-64	13.842	14.849	10.585	10.16
P17011-001-198	17.236	16.445	14.102	14.095
P17011-001-53	4.713	4.694	3.927	3.911
P17011-001-185	6.277	6.255	5.492	5.473
P17011-001-82	21.97	21.924	18.047	18.009
P17011-001-83	15.892	17.211	12.714	13.299
P17011-001-86	18.085	16.427	14.153	12.516
P17011-001-188	4.719	7.044	3.146	5.478
P17011-001-92	5.553	7.036	3.966	6.254
P17011-001-118	9.487	10.972	7.906	9.404
P17011-001-123	13.334	14.078	8.628	8.604
P17011-001-142	43.011	43.794	33.273	32.064
P17011-001-154	24.345	28.916	19.633	21.882
P17011-001-163	27.466	25.808	24.327	21.898
P17011-001-23	7.831	7.82	7.048	7.038
Institution 1: Hospital 12 Octubre
Institution 3: Hospital Ramón y Cajal

## Sheet: OTML
Supplementary Table S3-B: Reproducibility assay TMB results for OTML (N=23) between Institution 1 and Institution 2.
ID	Deamination Institution 2	Total TMB Institution 2	WF10% Institution 2	Deamination Institution 1	Total TMB Institution 1	WF10% Institution 1	Observations
P17011-001-25	8	10.9002		6	9.24992
P17011-001-57	2	10.0853		2	10.1323
P17011-001-61	1	18.4769		3	19.4822
P17011-001-67	1	3.36185		4	5.08993
P17011-001-75	8	27.7502		7	32.082
P17011-001-79	6	32.9669		8	36.986
P17011-001-87	4	5.89491		3	5.91941
P17011-001-94	3	13.5209		16	22.999
P17011-001-96	2	5.07193		0	5.14514
P17011-001-103	6	14.3438		7	15.5505
P17011-001-110	7	45.1822		8	47.9782
P17011-001-111	0	8.44937		4	11.0481
P17011-001-115	3	5.91716		3	5.92742
P17011-001-116	3	4.23151		3	3.37347
P17011-001-129	9	16.9573		45	10.3112		High deamination H12O
P17011-001-133	4	9.26008		5	10.2292
P17011-001-140	29	5.98097	Yes	126	16.3557		High deamination H12O and Sanchinarro
P17011-001-141	0	0		20	1.69769	Yes	High deamination H12O
P17011-001-161	3	3.37967		17	14.8697
P17011-001-164	2	6.74136		6	9.44359
P17011-001-165	13	16.8387		8	10.2947
P17011-001-167	17	21.3006		39	5.31347	Yes	High deamination H12O
P17011-001-18	9	16.8747		34	8.16692	Yes	High deamination H12O
Institution 1: Hospital 12 Octubre
Institution 2: Hospital HM Sanchinarro
