# Supplementary material for: Tumor mutational burden assessment in non-small-cell lung cancer samples: results from the TMB2 harmonization project comparing three NGS panels
Source: J Immunother Cancer. 2021 May 7;9(5):e001904. doi: 10.1136/jitc-2020-001904 (PMC8108670; doi:10.1136/jitc-2020-001904)
Supplement: Supplementary data [file jitc-2020-001904supp005.xlsx]

## Sheet: P1(10)P2
SUPPLEMENTARY TABLE S4. ROC (RECEIVER OPERATING CHARACTERISTIC) CURVES FOR THE DETERMINATION OF THE ADJUSTED CUTOFF VALUES WITH TSO500 (P2) AND OTML (P3), COMPARED TO FIXED VALUES SELECTED FOR FOUNDATION ONE (P1) AS REFERENCE METHOD
Supplementary Table S4-A: P1(10)P2 – ROC curve of TSO500 for cutoff 10 muts/Mb by FO
Value P1 (Foundation One) ≥ 10 muts/Mb versus P2 (TSO500)
ROC -Asymptotic Normal--
Obs Area Std. Err. [95% Conf. Interval]
------------------------------------------------------------
96 0.9014 0.0349 0.83305 0.96982
Optimal cutoff
. cutpt P1FoundationOne_mas10 P2Illumina
Empirical cut-off point estimation
Method: Liu
Reference variable: P1FoundationOne_mas10 (0=neg, 1=pos)
Classification variable: P2Illumina
Empirical optimal cut-off point: 10.2305
Sensitivity at cut-off point: 0.76
Specificity at cut-off point: 0.98
Area under ROC curve at cut-off point: 0.87
	j	cut	sensitivity	lower 95% CI	upper 95% CI	Specificity	lower 95% CI	upper 95% CI	Positive predictive value	lower 95% CI	upper 95% CI	Negative predictive value	lower 95% CI	upper 95% CI	likelihood ratio positive	lower 95% CI	upper 95% CI	likelihood ratio negative	lower 95% CI	upper 95% CI	accuracy
newrow	1	0.780	100	100	100	0	0	0	51040	41040	61040				1	1	1				51.040 \\
newrow.1	2	0.790	100	100	100	2130	0	6250	51580	41530	61630	100	100	100	1022	0.980	1066	0	0		52.080 \\
newrow.2	3	1570	100	100	100	4260	0	10030	52130	42030	62230	100	100	100	1044	0.983	1109	0	0		53.120 \\
newrow.3	4	1580	95920	90380	100	8510	0.530	16490	52220	41900	62540	66670	28950	100	1048	0.944	1164	0.479	0.092	2495	53.120 \\
newrow.4	5	1620	95920	90380	100	10640	1820	19450	52810	42440	63180	71430	37960	100	1073	0.958	1203	0.384	0.078	1881	54.170 \\
newrow.5	6	2350	95920	90380	100	12770	3230	22310	53410	42990	63830	75	44990	100	1100	0.972	1244	0.320	0.068	1505	55.210 \\
newrow.6	7	2360	95920	90380	100	17020	6280	27770	54650	44130	65170	80	55210	100	1156	1003	1332	0.240	0.054	1071	57.290 \\
newrow.7	8	2370	95920	90380	100	19150	7900	30400	55290	44720	65860	81820	59030	100	1186	1020	1379	0.213	0.049	0.935	58.330 \\
newrow.8	9	3140	95920	90380	100	21280	9580	32980	55950	45340	66570	83330	62250	100	1218	1039	1429	0.192	0.044	0.829	59.380 \\
newrow.9	10	3150	93880	87160	100	23400	11300	35510	56100	45360	66840	78570	57080	100	1226	1030	1458	0.262	0.078	0.879	59.380 \\
newrow.10	11	3220	93880	87160	100	25530	13070	38	56790	46	67580	80	59760	100	1261	1051	1512	0.240	0.072	0.796	60.420 \\
newrow.11	12	3860	93880	87160	100	27660	14870	40450	57500	46670	68330	81250	62130	100	1298	1073	1570	0.221	0.067	0.727	61.460 \\
newrow.12	13	3920	93880	87160	100	29790	16710	42860	58230	47350	69100	82350	64230	100	1337	1095	1632	0.205	0.063	0.669	62.500 \\
newrow.13	14	3930	93880	87160	100	34040	20500	47590	59740	48790	70690	84210	67810	100	1423	1145	1769	0.180	0.056	0.577	64.580 \\
newrow.14	15	4710	93880	87160	100	38300	24400	52200	61330	50310	72350	85710	70750	100	1522	1201	1927	0.160	0.050	0.507	66.670 \\
newrow.15	16	4720	93880	87160	100	42550	28420	56690	63010	51940	74090	86960	73190	100	1634	1265	2111	0.144	0.046	0.452	68.750 \\
newrow.16	17	4750	93880	87160	100	44680	30470	58890	63890	52790	74980	87500	74270	100	1697	1300	2216	0.137	0.044	0.429	69.790 \\
newrow.17	18	5480	93880	87160	100	46810	32540	61070	64790	53680	75900	88	75260	100	1765	1337	2330	0.131	0.042	0.408	70.830 \\
newrow.18	19	5500	91840	84170	99500	46810	32540	61070	64290	53060	75510	84620	70750	98480	1727	1304	2287	0.174	0.065	0.468	69.790 \\
newrow.19	20	5550	91840	84170	99500	51060	36770	65360	66180	54930	77420	85710	72750	98680	1877	1385	2543	0.160	0.060	0.426	71.880 \\
newrow.20	21	5870	91840	84170	99500	53190	38930	67460	67160	55920	78410	86210	73660	98760	1962	1430	2691	0.153	0.058	0.407	72.920 \\
newrow.21	22	6280	91840	84170	99500	55320	41110	69530	68180	56940	79420	86670	74500	98830	2055	1479	2856	0.148	0.056	0.390	73.960 \\
newrow.22	23	6330	91840	84170	99500	59570	45540	73600	70310	59120	81510	87500	76040	98960	2272	1590	3246	0.137	0.052	0.361	76.040 \\
newrow.23	24	6360	91840	84170	99500	61700	47800	75600	71430	60270	82580	87880	76740	99010	2398	1652	3480	0.132	0.050	0.348	77.080 \\
newrow.24	25	7050	91840	84170	99500	63830	50090	77570	72580	61480	83680	88240	77410	99070	2539	1721	3746	0.128	0.049	0.335	78.120 \\
newrow.25	26	7070	91840	84170	99500	68090	54760	81410	75	64040	85960	88890	78620	99150	2878	1880	4406	0.120	0.046	0.313	80.210 \\
newrow.26	27	7830	91840	84170	99500	70210	57140	83290	76270	65420	87130	89190	79180	99190	3083	1972	4819	0.116	0.045	0.303	81.250 \\
newrow.27	28	7840	89800	81320	98270	72340	59550	85130	77190	66300	88090	87180	76690	97670	3247	2025	5204	0.141	0.060	0.330	81.250 \\
newrow.28	29	7850	89800	81320	98270	74470	62	86930	78570	67820	89320	87500	77250	97750	3517	2139	5784	0.137	0.059	0.320	82.290 \\
newrow.29	30	7870	87760	78580	96930	74470	62	86930	78180	67270	89100	85370	74550	96180	3438	2086	5664	0.164	0.076	0.354	81.250 \\
newrow.30	31	7950	87760	78580	96930	76600	64490	88700	79630	68890	90370	85710	75130	96300	3750	2213	6357	0.160	0.074	0.344	82.290 \\
newrow.31	32	8410	87760	78580	96930	78720	67020	90420	81130	70600	91670	86050	75690	96400	4124	2356	7218	0.156	0.072	0.334	83.330 \\
newrow.32	33	8610	85710	75920	95510	78720	67020	90420	80770	70060	91480	84090	73280	94900	4028	2297	7063	0.182	0.090	0.366	82.290 \\
newrow.33	34	8620	85710	75920	95510	80850	69600	92100	82350	71890	92820	84440	73860	95030	4476	2460	8143	0.177	0.088	0.356	83.330 \\
newrow.34	35	8630	85710	75920	95510	82980	72230	93720	84	73840	94160	84780	74400	95160	5036	2651	9565	0.172	0.086	0.346	84.380 \\
newrow.35	36	8640	85710	75920	95510	85110	74930	95280	85710	75920	95510	85110	74930	95280	5756	2879	11510	0.168	0.084	0.337	85.420 \\
newrow.36	37	9	83670	73320	94020	85110	74930	95280	85420	75430	95400	83330	72790	93880	5619	2806	11254	0.192	0.101	0.366	84.380 \\
newrow.37	38	9390	81630	70790	92470	85110	74930	95280	85110	74930	95280	81630	70790	92470	5482	2733	10998	0.216	0.118	0.394	83.330 \\
newrow.38	39	9430	81630	70790	92470	87230	77690	96770	86960	77220	96690	82	71350	92650	6392	2992	13655	0.211	0.116	0.384	84.380 \\
newrow.39	40	9490	79590	68310	90880	87230	77690	96770	86670	76730	96600	80390	69500	91290	6233	2913	13336	0.234	0.133	0.411	83.330 \\
newrow.40	41	10050	79590	68310	90880	89360	80550	98180	88640	79260	98010	80770	70060	91480	7480	3227	17338	0.228	0.130	0.400	84.380 \\
newrow.41	42	10190	77550	65870	89230	89360	80550	98180	88370	78790	97950	79250	68330	90160	7288	3140	16920	0.251	0.148	0.427	83.330 \\
newrow.42	43	10200	77550	65870	89230	91490	83510	99470	90480	81600	99350	79630	68890	90370	9113	3526	23549	0.245	0.145	0.416	84.380 \\
newrow.43	44	10210	75510	63470	87550	91490	83510	99470	90240	81160	99330	78180	67270	89100	8873	3429	22962	0.268	0.162	0.441	83.330 \\
newrow.44	45	10220	75510	63470	87550	95740	89970	100	94870	87950	100	78950	68360	89530	17725	4525	69438	0.256	0.156	0.420	85.420 \\
newrow.45	46	10240	75510	63470	87550	97870	93750	100	97370	92280	100	79310	68890	89740	35451	5066	248068	0.250	0.153	0.410	86.460 \\
newrow.46	47	10250	73470	61110	85830	97870	93750	100	97300	92070	100	77970	67390	88540	34493	4926	241545	0.271	0.170	0.433	85.420 \\
newrow.47	48	10990	71430	58780	84080	97870	93750	100	97220	91850	100	76670	65960	87370	33535	4785	235022	0.292	0.187	0.455	84.380 \\
newrow.48	49	11780	69390	56480	82290	97870	93750	100	97140	91620	100	75410	64600	86220	32578	4645	228499	0.313	0.205	0.478	83.330 \\
newrow.49	50	11950	67350	54220	80480	97870	93750	100	97060	91380	100	74190	63300	85090	31620	4504	221976	0.334	0.223	0.500	82.290 \\
newrow.50	51	12570	65310	51980	78630	97870	93750	100	96970	91120	100	73020	62060	83980	30662	4364	215454	0.354	0.241	0.522	81.250 \\
newrow.51	52	12580	63270	49770	76760	97870	93750	100	96880	90850	100	71880	60860	82890	29704	4223	208931	0.375	0.259	0.543	80.210 \\
newrow.52	53	12840	61220	47580	74870	97870	93750	100	96770	90550	100	70770	59710	81830	28742	4082	202376	0.396	0.278	0.565	79.170 \\
newrow.53	54	13330	59180	45420	72950	97870	93750	100	96670	90240	100	69700	58610	80780	27784	3942	195854	0.417	0.297	0.586	78.120 \\
newrow.54	55	13350	57140	43290	71	97870	93750	100	96550	89910	100	68660	57550	79760	26826	3801	189332	0.438	0.316	0.607	77.080 \\
newrow.55	56	13370	53060	39090	67030	100	100	100	100	100	100	67140	56140	78150	Inf		Inf	0.469	0.348	0.632	76.040 \\
newrow.56	57	13840	51020	37020	65020	100	100	100	100	100	100	66200	55190	77200	Inf		Inf	0.490	0.368	0.652	75 \\
newrow.57	58	14820	48980	34980	62980	100	100	100	100	100	100	65280	54280	76270	Inf		Inf	0.510	0.388	0.671	73.960 \\
newrow.58	59	15340	46940	32970	60910	100	100	100	100	100	100	64380	53400	75370	Inf		Inf	0.531	0.408	0.690	72.920 \\
newrow.59	60	15470	44900	30970	58820	100	100	100	100	100	100	63510	52550	74480	Inf		Inf	0.551	0.428	0.709	71.880 \\
newrow.60	61	15890	42860	29	56710	100	100	100	100	100	100	62670	51720	73610	Inf		Inf	0.571	0.448	0.728	70.830 \\
newrow.61	62	16450	40820	27050	54580	100	100	100	100	100	100	61840	50920	72760	Inf		Inf	0.592	0.469	0.747	69.790 \\
newrow.62	63	17240	38780	25130	52420	100	100	100	100	100	100	61040	50150	71930	Inf		Inf	0.612	0.490	0.765	68.750 \\
newrow.63	64	17290	36730	23240	50230	100	100	100	100	100	100	60260	49400	71120	Inf		Inf	0.633	0.511	0.783	67.710 \\
newrow.64	65	18090	34690	21370	48020	100	100	100	100	100	100	59490	48670	70320	Inf		Inf	0.653	0.532	0.801	66.670 \\
newrow.65	66	19430	32650	19520	45780	100	100	100	100	100	100	58750	47960	69540	Inf		Inf	0.674	0.554	0.818	65.620 \\
newrow.66	67	21930	30610	17710	43520	100	100	100	100	100	100	58020	47280	68770	Inf		Inf	0.694	0.576	0.836	64.580 \\
newrow.67	68	21970	28570	15920	41220	100	100	100	100	100	100	57320	46610	68020	Inf		Inf	0.714	0.598	0.853	63.540 \\
newrow.68	69	22080	26530	14170	38890	100	100	100	100	100	100	56630	45960	67290	Inf		Inf	0.735	0.621	0.869	62.500 \\
newrow.69	70	24340	24490	12450	36530	100	100	100	100	100	100	55950	45340	66570	Inf		Inf	0.755	0.644	0.886	61.460 \\
newrow.70	71	25	22450	10770	34130	100	100	100	100	100	100	55290	44720	65860	Inf		Inf	0.776	0.667	0.902	60.420 \\
newrow.71	72	27470	20410	9120	31690	100	100	100	100	100	100	54650	44130	65170	Inf		Inf	0.796	0.691	0.917	59.380 \\
newrow.72	73	34800	18370	7530	29210	100	100	100	100	100	100	54020	43550	64500	Inf		Inf	0.816	0.715	0.932	58.330 \\
newrow.73	74	36240	16330	5980	26680	100	100	100	100	100	100	53410	42990	63830	Inf		Inf	0.837	0.739	0.947	57.290 \\
newrow.74	75	41580	14290	4490	24080	100	100	100	100	100	100	52810	42440	63180	Inf		Inf	0.857	0.764	0.961	56.250 \\
newrow.75	76	43010	12240	3070	21420	100	100	100	100	100	100	52220	41900	62540	Inf		Inf	0.878	0.790	0.974	55.210 \\
newrow.76	77	51650	10200	1730	18680	100	100	100	100	100	100	51650	41380	61920	Inf		Inf	0.898	0.817	0.987	54.170 \\
newrow.77	78	54840	8160	0.500	15830	100	100	100	100	100	100	51090	40870	61300	Inf		Inf	0.918	0.845	0.998	53.120 \\
newrow.78	79	61710	6120	0	12840	100	100	100	100	100	100	50540	40380	60700	Inf		Inf	0.939	0.874	1008	52.080 \\
newrow.79	80	74560	4080	0	9620	100	100	100	100	100	100	50	39890	60110	Inf		Inf	0.959	0.905	1016	51.040 \\
newrow.80	81	84	2040	0	6	100	100	100	100	100	100	49470	39420	59530	Inf		Inf	0.980	0.941	1020	50 \\

## Sheet: P1(10)P3
Supplementary Table S4-B: P1(10)P3 – ROC curve of OTML for cutoff 10 muts/Mb by FO
Value P1 (Foundation One) ≥ 10 muts/Mb versus P3 (OTML)
ROC -Asymptotic Normal--
Obs Area Std. Err. [95% Conf. Interval]
------------------------------------------------------------
96 0.8949 0.0313 0.83363 0.95621
Optimal cutoff
. cutpt P1FoundationOne_mas10 P3Thermo
Empirical cut-off point estimation
Method: Liu
Reference variable: P1FoundationOne_mas10 (0=neg, 1=pos)
Classification variable: P3Thermo
Empirical optimal cut-off point: 9.3060865
Sensitivity at cut-off point: 0.84
Specificity at cut-off point: 0.83
Area under ROC curve at cut-off point: 0.83
	j	cut	sensitivity	lower 95% CI	upper 95% CI	Specificity	lower 95% CI	upper 95% CI	Positive predictive value	lower 95% CI	upper 95% CI	Negative predictive value	lower 95% CI	upper 95% CI	likelihood ratio positive	lower 95% CI	upper 95% CI	likelihood ratio negative	lower 95% CI	upper 95% CI	accuracy
newrow	1	0	100	100	100	0	0	0	51040	41040	61040				1	1	1				51.040 \\
newrow.1	2	1680	100	100	100	2130	0	6250	51580	41530	61630	100	100	100	1022	0.980	1066	0	0		52.080 \\
newrow.2	3	2520	100	100	100	4260	0	10030	52130	42030	62230	100	100	100	1044	0.983	1109	0	0		53.120 \\
newrow.3	4	2540	100	100	100	6380	0	13370	52690	42540	62840	100	100	100	1068	0.991	1151	0	0		54.170 \\
newrow.4	5	2550	100	100	100	8510	0.530	16490	53260	43070	63460	100	100	100	1093	1002	1193	0	0		55.210 \\
newrow.5	6	3360	100	100	100	10640	1820	19450	53850	43600	64090	100	100	100	1119	1014	1235	0	0		56.250 \\
newrow.6	7	3370	100	100	100	14890	4720	25070	55060	44720	65390	100	100	100	1175	1043	1324	0	0		58.330 \\
newrow.7	8	3380	100	100	100	19150	7900	30400	56320	45900	66740	100	100	100	1237	1076	1422	0	0		60.420 \\
newrow.8	9	4210	100	100	100	23400	11300	35510	57650	47140	68150	100	100	100	1306	1115	1529	0	0		62.500 \\
newrow.9	10	4230	100	100	100	27660	14870	40450	59040	48460	69620	100	100	100	1382	1158	1650	0	0		64.580 \\
newrow.10	11	5040	100	100	100	29790	16710	42860	59760	49140	70370	100	100	100	1424	1182	1716	0	0		65.620 \\
newrow.11	12	5050	100	100	100	31910	18590	45240	60490	49850	71140	100	100	100	1469	1208	1786	0	0		66.670 \\
newrow.12	13	5060	100	100	100	34040	20500	47590	61250	50570	71930	100	100	100	1516	1235	1862	0	0		67.710 \\
newrow.13	14	5070	97960	94	100	34040	20500	47590	60760	49990	71530	94120	82930	100	1485	1205	1831	0.060	0.008	0.434	66.670 \\
newrow.14	15	5090	97960	94	100	36170	22430	49910	61540	50740	72340	94440	83860	100	1535	1233	1910	0.056	0.008	0.407	67.710 \\
newrow.15	16	5110	97960	94	100	40430	26400	54460	63160	52310	74	95	85450	100	1645	1295	2088	0.050	0.007	0.362	69.790 \\
newrow.16	17	5870	97960	94	100	42550	28420	56690	64	53140	74860	95240	86130	100	1705	1329	2188	0.048	0.007	0.343	70.830 \\
newrow.17	18	5880	97960	94	100	44680	30470	58890	64860	53990	75740	95450	86750	100	1771	1365	2297	0.046	0.006	0.326	71.880 \\
newrow.18	19	5890	95920	90380	100	44680	30470	58890	64380	53400	75370	91300	79790	100	1734	1332	2256	0.091	0.023	0.368	70.830 \\
newrow.19	20	5920	95920	90380	100	48940	34640	63230	66200	55190	77200	92	81370	100	1879	1412	2500	0.083	0.021	0.334	72.920 \\
newrow.20	21	5980	95920	90380	100	51060	36770	65360	67140	56140	78150	92310	82070	100	1960	1455	2640	0.080	0.020	0.320	73.960 \\
newrow.21	22	6720	93880	87160	100	51060	36770	65360	66670	55540	77790	88890	77030	100	1918	1420	2591	0.120	0.039	0.372	72.920 \\
newrow.22	23	6730	93880	87160	100	53190	38930	67460	67650	56530	78770	89290	77830	100	2006	1466	2743	0.115	0.037	0.356	73.960 \\
newrow.23	24	6740	93880	87160	100	57450	43310	71580	69700	58610	80780	90	79260	100	2206	1571	3099	0.106	0.035	0.328	76.040 \\
newrow.24	25	6760	93880	87160	100	59570	45540	73600	70770	59710	81830	90320	79920	100	2322	1629	3309	0.103	0.034	0.315	77.080 \\
newrow.25	26	7560	93880	87160	100	61700	47800	75600	71880	60860	82890	90620	80530	100	2451	1693	3548	0.099	0.032	0.304	78.120 \\
newrow.26	27	7590	89800	81320	98270	61700	47800	75600	70970	59670	82270	85290	73390	97200	2345	1611	3411	0.165	0.070	0.391	76.040 \\
newrow.27	28	8360	89800	81320	98270	63830	50090	77570	72130	60880	83380	85710	74120	97310	2483	1679	3672	0.160	0.068	0.377	77.080 \\
newrow.28	29	8380	89800	81320	98270	65960	52410	79500	73330	62140	84520	86110	74810	97410	2638	1752	3971	0.155	0.066	0.364	78.120 \\
newrow.29	30	8390	87760	78580	96930	65960	52410	79500	72880	61540	84230	83780	71910	95660	2578	1708	3890	0.186	0.085	0.404	77.080 \\
newrow.30	31	8410	87760	78580	96930	68090	54760	81410	74140	62870	85410	84210	72620	95800	2750	1788	4230	0.180	0.083	0.390	78.120 \\
newrow.31	32	8430	87760	78580	96930	70210	57140	83290	75440	64260	86610	84620	73290	95940	2946	1876	4626	0.174	0.080	0.377	79.170 \\
newrow.32	33	8450	87760	78580	96930	72340	59550	85130	76790	65730	87840	85	73930	96070	3173	1975	5097	0.169	0.078	0.366	80.210 \\
newrow.33	34	9210	87760	78580	96930	74470	62	86930	78180	67270	89100	85370	74550	96180	3438	2086	5664	0.164	0.076	0.354	81.250 \\
newrow.34	35	9240	87760	78580	96930	76600	64490	88700	79630	68890	90370	85710	75130	96300	3750	2213	6357	0.160	0.074	0.344	82.290 \\
newrow.35	36	9260	85710	75920	95510	76600	64490	88700	79250	68330	90160	83720	72690	94760	3663	2157	6221	0.187	0.092	0.377	81.250 \\
newrow.36	37	9280	85710	75920	95510	80850	69600	92100	82350	71890	92820	84440	73860	95030	4476	2460	8143	0.177	0.088	0.356	83.330 \\
newrow.37	38	9300	83670	73320	94020	80850	69600	92100	82	71350	92650	82610	71660	93560	4369	2397	7964	0.202	0.106	0.386	82.290 \\
newrow.38	39	9310	83670	73320	94020	82980	72230	93720	83670	73320	94020	82980	72230	93720	4916	2584	9354	0.197	0.103	0.376	83.330 \\
newrow.39	40	10080	81630	70790	92470	82980	72230	93720	83330	72790	93880	81250	70210	92290	4796	2516	9142	0.221	0.121	0.405	82.290 \\
newrow.40	41	10090	79590	68310	90880	82980	72230	93720	82980	72230	93720	79590	68310	90880	4676	2449	8931	0.246	0.139	0.434	81.250 \\
newrow.41	42	10150	77550	65870	89230	82980	72230	93720	82610	71660	93560	78	66520	89480	4556	2381	8719	0.270	0.158	0.462	80.210 \\
newrow.42	43	10160	77550	65870	89230	85110	74930	95280	84440	73860	95030	78430	67140	89720	5208	2587	10486	0.264	0.155	0.450	81.250 \\
newrow.43	44	10200	77550	65870	89230	87230	77690	96770	86360	76220	96500	78850	67750	89950	6073	2833	13016	0.257	0.151	0.438	82.290 \\
newrow.44	45	10900	75510	63470	87550	87230	77690	96770	86050	75690	96400	77360	66090	88630	5913	2754	12697	0.281	0.170	0.465	81.250 \\
newrow.45	46	11730	73470	61110	85830	87230	77690	96770	85710	75130	96300	75930	64520	87330	5753	2674	12377	0.304	0.188	0.491	80.210 \\
newrow.46	47	11770	71430	58780	84080	87230	77690	96770	85370	74550	96180	74550	63030	86060	5594	2595	12057	0.328	0.208	0.517	79.170 \\
newrow.47	48	11820	69390	56480	82290	87230	77690	96770	85	73930	96070	73210	61620	84810	5434	2516	11737	0.351	0.227	0.542	78.120 \\
newrow.48	49	12600	67350	54220	80480	87230	77690	96770	84620	73290	95940	71930	60260	83590	5274	2436	11418	0.374	0.247	0.568	77.080 \\
newrow.49	50	12760	67350	54220	80480	89360	80550	98180	86840	76090	97590	72410	60910	83920	6330	2702	14828	0.365	0.242	0.553	78.120 \\
newrow.50	51	13220	67350	54220	80480	91490	83510	99470	89190	79180	99190	72880	61540	84230	7914	3038	20616	0.357	0.236	0.539	79.170 \\
newrow.51	52	13430	65310	51980	78630	91490	83510	99470	88890	78620	99150	71670	60260	83070	7675	2941	20030	0.379	0.256	0.562	78.120 \\
newrow.52	53	13450	63270	49770	76760	91490	83510	99470	88570	78030	99110	70490	59050	81940	7435	2843	19444	0.402	0.275	0.586	77.080 \\
newrow.53	54	13490	61220	47580	74870	93620	86630	100	90910	81100	100	69840	58510	81170	9596	3139	29332	0.414	0.289	0.594	77.080 \\
newrow.54	55	13520	59180	45420	72950	93620	86630	100	90620	80530	100	68750	57390	80110	9276	3029	28410	0.436	0.309	0.616	76.040 \\
newrow.55	56	13530	57140	43290	71	93620	86630	100	90320	79920	100	67690	56320	79060	8956	2918	27489	0.458	0.328	0.638	75 \\
newrow.56	57	14250	55100	41180	69030	93620	86630	100	90	79260	100	66670	55290	78040	8636	2808	26568	0.480	0.349	0.660	73.960 \\
newrow.57	58	14290	53060	39090	67030	93620	86630	100	89660	78570	100	65670	54300	77040	8317	2697	25646	0.501	0.369	0.682	72.920 \\
newrow.58	59	14340	51020	37020	65020	93620	86630	100	89290	77830	100	64710	53350	76060	7997	2586	24725	0.523	0.389	0.703	71.880 \\
newrow.59	60	15100	48980	34980	62980	93620	86630	100	88890	77030	100	63770	52430	75110	7677	2476	23803	0.545	0.410	0.724	70.830 \\
newrow.60	61	15440	48980	34980	62980	95740	89970	100	92310	82070	100	64290	53060	75510	11498	2876	45971	0.533	0.402	0.706	71.880 \\
newrow.61	62	15970	46940	32970	60910	95740	89970	100	92	81370	100	63380	52170	74590	11019	2749	44167	0.554	0.423	0.726	70.830 \\
newrow.62	63	16840	42860	29	56710	95740	89970	100	91300	79790	100	61640	50490	72800	10061	2496	40559	0.597	0.465	0.766	68.750 \\
newrow.63	64	16870	42860	29	56710	97870	93750	100	95450	86750	100	62160	51110	73210	20122	2818	143682	0.584	0.456	0.747	69.790 \\
newrow.64	65	16960	42860	29	56710	100	100	100	100	100	100	62670	51720	73610	Inf		Inf	0.571	0.448	0.728	70.830 \\
newrow.65	66	17670	40820	27050	54580	100	100	100	100	100	100	61840	50920	72760	Inf		Inf	0.592	0.469	0.747	69.790 \\
newrow.66	67	17760	38780	25130	52420	100	100	100	100	100	100	61040	50150	71930	Inf		Inf	0.612	0.490	0.765	68.750 \\
newrow.67	68	18480	36730	23240	50230	100	100	100	100	100	100	60260	49400	71120	Inf		Inf	0.633	0.511	0.783	67.710 \\
newrow.68	69	19340	34690	21370	48020	100	100	100	100	100	100	59490	48670	70320	Inf		Inf	0.653	0.532	0.801	66.670 \\
newrow.69	70	20280	32650	19520	45780	100	100	100	100	100	100	58750	47960	69540	Inf		Inf	0.674	0.554	0.818	65.620 \\
newrow.70	71	20300	30610	17710	43520	100	100	100	100	100	100	58020	47280	68770	Inf		Inf	0.694	0.576	0.836	64.580 \\
newrow.71	72	21300	28570	15920	41220	100	100	100	100	100	100	57320	46610	68020	Inf		Inf	0.714	0.598	0.853	63.540 \\
newrow.72	73	22670	26530	14170	38890	100	100	100	100	100	100	56630	45960	67290	Inf		Inf	0.735	0.621	0.869	62.500 \\
newrow.73	74	22700	24490	12450	36530	100	100	100	100	100	100	55950	45340	66570	Inf		Inf	0.755	0.644	0.886	61.460 \\
newrow.74	75	23470	22450	10770	34130	100	100	100	100	100	100	55290	44720	65860	Inf		Inf	0.776	0.667	0.902	60.420 \\
newrow.75	76	23540	20410	9120	31690	100	100	100	100	100	100	54650	44130	65170	Inf		Inf	0.796	0.691	0.917	59.380 \\
newrow.76	77	27750	18370	7530	29210	100	100	100	100	100	100	54020	43550	64500	Inf		Inf	0.816	0.715	0.932	58.330 \\
newrow.77	78	27990	16330	5980	26680	100	100	100	100	100	100	53410	42990	63830	Inf		Inf	0.837	0.739	0.947	57.290 \\
newrow.78	79	32970	14290	4490	24080	100	100	100	100	100	100	52810	42440	63180	Inf		Inf	0.857	0.764	0.961	56.250 \\
newrow.79	80	34420	12240	3070	21420	100	100	100	100	100	100	52220	41900	62540	Inf		Inf	0.878	0.790	0.974	55.210 \\
newrow.80	81	40340	10200	1730	18680	100	100	100	100	100	100	51650	41380	61920	Inf		Inf	0.898	0.817	0.987	54.170 \\
newrow.81	82	45180	8160	0.500	15830	100	100	100	100	100	100	51090	40870	61300	Inf		Inf	0.918	0.845	0.998	53.120 \\
newrow.82	83	50450	6120	0	12840	100	100	100	100	100	100	50540	40380	60700	Inf		Inf	0.939	0.874	1008	52.080 \\
newrow.83	84	55500	4080	0	9620	100	100	100	100	100	100	50	39890	60110	Inf		Inf	0.959	0.905	1016	51.040 \\
newrow.84	85	59790	2040	0	6	100	100	100	100	100	100	49470	39420	59530	Inf		Inf	0.980	0.941	1020	50 \\
\hline \\[-1.8ex]

## Sheet: P1(13)P2
Supplementary Table S4-C: P1(13)P2 – ROC curve of TSO500 for cutoff 13 muts/Mb by FO
Value P1 (Foundation One) ≥ 13 muts/Mb versus P2 (TSO500)
ROC -Asymptotic Normal--
Obs Area Std. Err. [95% Conf. Interval]
------------------------------------------------------------
96 0.8714 0.0473 0.77883 0.96405
Optimal cutoff
. cutpt P1FoundationOne_mas13 P2Illumina
Empirical cut-off point estimation
Method: Liu
Reference variable: P1FoundationOne_mas13 (0=neg, 1=pos)
Classification variable: P2Illumina
Empirical optimal cut-off point: 10.622
Sensitivity at cut-off point: 0.82
Specificity at cut-off point: 0.87
Area under ROC curve at cut-off point: 0.85
	j	cut	sensitivity	lower 95% CI	upper 95% CI	Specificity	lower 95% CI	upper 95% CI	Positive predictive value	lower 95% CI	upper 95% CI	Negative predictive value	lower 95% CI	upper 95% CI	likelihood ratio positive	lower 95% CI	upper 95% CI	likelihood ratio negative	lower 95% CI	upper 95% CI	accuracy
newrow	1	0.780	100	100	100	0	0	0	35420	25850	44980				1	1	1				35.420 \\
newrow.1	2	0.790	100	100	100	1610	0	4750	35790	26150	45430	100	100	100	1016	0.984	1049	0	0		36.460 \\
newrow.2	3	1570	100	100	100	3230	0	7620	36170	26460	45880	100	100	100	1033	0.988	1081	0	0		37.500 \\
newrow.3	4	1580	94120	86210	100	6450	0.340	12570	35560	25670	45450	66670	28950	100	1006	0.904	1119	0.912	0.176	4723	37.500 \\
newrow.4	5	1620	94120	86210	100	8060	1290	14840	35960	25990	45920	71430	37960	100	1024	0.915	1145	0.730	0.149	3562	38.540 \\
newrow.5	6	2350	94120	86210	100	9680	2320	17040	36360	26310	46410	75	44990	100	1042	0.927	1172	0.607	0.130	2847	39.580 \\
newrow.6	7	2360	94120	86210	100	12900	4560	21250	37210	26990	47430	80	55210	100	1081	0.951	1227	0.456	0.102	2026	41.670 \\
newrow.7	8	2370	94120	86210	100	14520	5750	23280	37650	27350	47950	81820	59030	100	1101	0.964	1257	0.405	0.093	1768	42.710 \\
newrow.8	9	3140	94120	86210	100	16130	6970	25280	38100	27710	48480	83330	62250	100	1122	0.978	1288	0.364	0.085	1569	43.750 \\
newrow.9	10	3150	91180	81640	100	17740	8230	27250	37800	27310	48300	78570	57080	100	1108	0.948	1295	0.497	0.149	1661	43.750 \\
newrow.10	11	3220	91180	81640	100	19350	9520	29190	38270	27690	48860	80	59760	100	1131	0.963	1328	0.456	0.138	1504	44.790 \\
newrow.11	12	3860	91180	81640	100	20970	10830	31100	38750	28070	49430	81250	62130	100	1154	0.978	1361	0.421	0.129	1374	45.830 \\
newrow.12	13	3920	91180	81640	100	22580	12170	32990	39240	28470	50010	82350	64230	100	1178	0.993	1396	0.391	0.121	1264	46.880 \\
newrow.13	14	3930	91180	81640	100	25810	14910	36700	40260	29310	51210	84210	67810	100	1229	1026	1472	0.342	0.107	1090	48.960 \\
newrow.14	15	4710	91180	81640	100	29030	17730	40330	41330	30190	52480	85710	70750	100	1285	1062	1554	0.304	0.096	0.958	51.040 \\
newrow.15	16	4720	91180	81640	100	32260	20620	43890	42470	31130	53800	86960	73190	100	1346	1101	1646	0.273	0.088	0.854	53.120 \\
newrow.16	17	4750	91180	81640	100	33870	22090	45650	43060	31620	54490	87500	74270	100	1379	1121	1695	0.260	0.084	0.810	54.170 \\
newrow.17	18	5480	91180	81640	100	35480	23570	47390	43660	32130	55200	88	75260	100	1413	1143	1747	0.249	0.080	0.771	55.210 \\
newrow.18	19	5500	91180	81640	100	37100	25070	49120	44290	32650	55920	88460	76180	100	1450	1166	1802	0.238	0.077	0.734	56.250 \\
newrow.19	20	5550	91180	81640	100	40320	28110	52530	45590	33750	57430	89290	77830	100	1528	1214	1922	0.219	0.071	0.672	58.330 \\
newrow.20	21	5870	91180	81640	100	41940	29650	54220	46270	34330	58210	89660	78570	100	1570	1240	1988	0.210	0.069	0.644	59.380 \\
newrow.21	22	6280	91180	81640	100	43550	31210	55890	46970	34930	59010	90	79260	100	1615	1268	2058	0.202	0.066	0.619	60.420 \\
newrow.22	23	6330	91180	81640	100	46770	34350	59190	48440	36190	60680	90620	80530	100	1713	1326	2212	0.189	0.062	0.574	62.500 \\
newrow.23	24	6360	91180	81640	100	48390	35950	60830	49210	36860	61550	90910	81100	100	1767	1359	2297	0.182	0.060	0.554	63.540 \\
newrow.24	25	7050	91180	81640	100	50	37550	62450	50	37550	62450	91180	81640	100	1824	1392	2389	0.176	0.058	0.535	64.580 \\
newrow.25	26	7070	91180	81640	100	53230	40810	65650	51670	39020	64310	91670	82640	100	1950	1466	2593	0.166	0.055	0.500	66.670 \\
newrow.26	27	7830	91180	81640	100	54840	42450	67230	52540	39800	65280	91890	83100	100	2019	1505	2708	0.161	0.053	0.485	67.710 \\
newrow.27	28	7840	91180	81640	100	58060	45780	70350	54390	41460	67320	92310	83940	100	2174	1593	2967	0.152	0.050	0.457	69.790 \\
newrow.28	29	7850	91180	81640	100	59680	47470	71890	55360	42340	68380	92500	84340	100	2261	1642	3115	0.148	0.049	0.444	70.830 \\
newrow.29	30	7870	91180	81640	100	61290	49170	73410	56360	43260	69470	92680	84710	100	2356	1693	3277	0.144	0.048	0.432	71.880 \\
newrow.30	31	7950	91180	81640	100	62900	50880	74930	57410	44220	70600	92860	85070	100	2458	1748	3455	0.140	0.047	0.420	72.920 \\
newrow.31	32	8410	91180	81640	100	64520	52610	76430	58490	45220	71760	93020	85410	100	2570	1808	3653	0.137	0.046	0.409	73.960 \\
newrow.32	33	8610	88240	77410	99070	64520	52610	76430	57690	44260	71120	90910	82410	99400	2487	1740	3555	0.182	0.071	0.466	72.920 \\
newrow.33	34	8620	88240	77410	99070	66130	54350	77910	58820	45320	72330	91110	82800	99430	2605	1802	3767	0.178	0.070	0.454	73.960 \\
newrow.34	35	8630	88240	77410	99070	67740	56110	79380	60	46420	73580	91300	83160	99450	2735	1869	4004	0.174	0.068	0.443	75 \\
newrow.35	36	8640	88240	77410	99070	69350	57880	80830	61220	47580	74870	91490	83510	99470	2879	1941	4269	0.170	0.067	0.432	76.040 \\
newrow.36	37	9	88240	77410	99070	70970	59670	82270	62500	48800	76200	91670	83850	99490	3040	2021	4571	0.166	0.065	0.422	77.080 \\
newrow.37	38	9390	88240	77410	99070	72580	61480	83680	63830	50090	77570	91840	84170	99500	3218	2108	4913	0.162	0.064	0.412	78.120 \\
newrow.38	39	9430	88240	77410	99070	74190	63300	85090	65220	51450	78980	92	84480	99520	3419	2203	5306	0.158	0.062	0.403	79.170 \\
newrow.39	40	9490	85290	73390	97200	74190	63300	85090	64440	50460	78430	90200	82030	98360	3304	2119	5154	0.198	0.087	0.452	78.120 \\
newrow.40	41	10050	85290	73390	97200	75810	65150	86470	65910	51900	79920	90380	82370	98400	3526	2221	5598	0.194	0.085	0.441	79.170 \\
newrow.41	42	10190	82350	69540	95170	75810	65150	86470	65120	50870	79360	88680	80150	97210	3404	2133	5432	0.233	0.111	0.488	78.120 \\
newrow.42	43	10200	82350	69540	95170	77420	67010	87830	66670	52410	80920	88890	80510	97270	3647	2242	5932	0.228	0.109	0.477	79.170 \\
newrow.43	44	10210	82350	69540	95170	79030	68900	89170	68290	54050	82540	89090	80850	97330	3927	2364	6525	0.223	0.107	0.467	80.210 \\
newrow.44	45	10220	82350	69540	95170	82260	72750	91770	71790	57670	85920	89470	81510	97440	4642	2657	8111	0.215	0.103	0.448	82.290 \\
newrow.45	46	10240	82350	69540	95170	83870	74720	93030	73680	59680	87680	89660	81820	97490	5105	2834	9197	0.210	0.101	0.438	83.330 \\
newrow.46	47	10250	82350	69540	95170	85480	76720	94250	75680	61850	89500	89830	82120	97540	5672	3039	10583	0.206	0.099	0.430	84.380 \\
newrow.47	48	10990	82350	69540	95170	87100	78750	95440	77780	64200	91360	90	82410	97590	6384	3282	12415	0.203	0.097	0.421	85.420 \\
newrow.48	49	11780	79410	65820	93	87100	78750	95440	77140	63230	91050	88520	80530	96520	6156	3153	12018	0.236	0.121	0.461	84.380 \\
newrow.49	50	11950	76470	62210	90730	87100	78750	95440	76470	62210	90730	87100	78750	95440	5928	3024	11620	0.270	0.146	0.499	83.330 \\
newrow.50	51	12570	73530	58700	88360	87100	78750	95440	75760	61140	90380	85710	77070	94360	5700	2895	11222	0.304	0.172	0.536	82.290 \\
newrow.51	52	12580	73530	58700	88360	88710	80830	96590	78120	63800	92450	85940	77420	94450	6513	3150	13465	0.298	0.169	0.526	83.330 \\
newrow.52	53	12840	70590	55270	85900	88710	80830	96590	77420	62700	92140	84620	75840	93390	6252	3011	12983	0.332	0.196	0.562	82.290 \\
newrow.53	54	13330	67650	51920	83370	88710	80830	96590	76670	61530	91800	83330	74340	92320	5992	2872	12502	0.365	0.222	0.598	81.250 \\
newrow.54	55	13350	67650	51920	83370	90320	82960	97680	79310	64570	94050	83580	74710	92450	6989	3155	15479	0.358	0.219	0.586	82.290 \\
newrow.55	56	13370	67650	51920	83370	95160	89820	100	88460	76180	100	84290	75760	92810	13977	4524	43186	0.340	0.208	0.555	85.420 \\
newrow.56	57	13840	64710	48640	80770	95160	89820	100	88	75260	100	83100	74380	91820	13370	4313	41448	0.371	0.234	0.587	84.380 \\
newrow.57	58	14820	61760	45430	78100	95160	89820	100	87500	74270	100	81940	73060	90830	12760	4101	39705	0.402	0.261	0.618	83.330 \\
newrow.58	59	15340	61760	45430	78100	96770	92380	100	91300	79790	100	82190	73420	90970	19121	4768	76673	0.395	0.257	0.607	84.380 \\
newrow.59	60	15470	61760	45430	78100	98390	95250	100	95450	86750	100	82430	73760	91100	38360	5392	272895	0.389	0.253	0.597	85.420 \\
newrow.60	61	15890	58820	42280	75370	98390	95250	100	95240	86130	100	81330	72520	90150	36534	5124	260511	0.418	0.280	0.626	84.380 \\
newrow.61	62	16450	55880	39190	72570	98390	95250	100	95	85450	100	80260	71310	89210	34708	4855	248127	0.448	0.307	0.656	83.330 \\
newrow.62	63	17240	55880	39190	72570	100	100	100	100	100	100	80520	71670	89370	Inf		Inf	0.441	0.302	0.644	84.380 \\
newrow.63	64	17290	52940	36160	69720	100	100	100	100	100	100	79490	70530	88450	Inf		Inf	0.471	0.330	0.672	83.330 \\
newrow.64	65	18090	50	33190	66810	100	100	100	100	100	100	78480	69420	87540	Inf		Inf	0.500	0.357	0.700	82.290 \\
newrow.65	66	19430	47060	30280	63840	100	100	100	100	100	100	77500	68350	86650	Inf		Inf	0.529	0.386	0.727	81.250 \\
newrow.66	67	21930	44120	27430	60810	100	100	100	100	100	100	76540	67320	85770	Inf		Inf	0.559	0.414	0.753	80.210 \\
newrow.67	68	21970	41180	24630	57720	100	100	100	100	100	100	75610	66310	84900	Inf		Inf	0.588	0.444	0.779	79.170 \\
newrow.68	69	22080	38240	21900	54570	100	100	100	100	100	100	74700	65350	84050	Inf		Inf	0.618	0.474	0.805	78.120 \\
newrow.69	70	24340	35290	19230	51360	100	100	100	100	100	100	73810	64410	83210	Inf		Inf	0.647	0.505	0.829	77.080 \\
newrow.70	71	25	32350	16630	48080	100	100	100	100	100	100	72940	63500	82390	Inf		Inf	0.676	0.536	0.854	76.040 \\
newrow.71	72	27470	29410	14100	44730	100	100	100	100	100	100	72090	62610	81570	Inf		Inf	0.706	0.568	0.877	75 \\
newrow.72	73	34800	26470	11640	41300	100	100	100	100	100	100	71260	61760	80770	Inf		Inf	0.735	0.601	0.900	73.960 \\
newrow.73	74	36240	23530	9270	37790	100	100	100	100	100	100	70450	60920	79990	Inf		Inf	0.765	0.635	0.921	72.920 \\
newrow.74	75	41580	20590	7	34180	100	100	100	100	100	100	69660	60110	79210	Inf		Inf	0.794	0.669	0.942	71.880 \\
newrow.75	76	43010	17650	4830	30460	100	100	100	100	100	100	68890	59320	78450	Inf		Inf	0.824	0.705	0.962	70.830 \\
newrow.76	77	51650	14710	2800	26610	100	100	100	100	100	100	68130	58560	77710	Inf		Inf	0.853	0.742	0.981	69.790 \\
newrow.77	78	54840	11760	0.930	22590	100	100	100	100	100	100	67390	57810	76970	Inf		Inf	0.882	0.780	0.998	68.750 \\
newrow.78	79	61710	8820	0	18360	100	100	100	100	100	100	66670	57090	76250	Inf		Inf	0.912	0.821	1012	67.710 \\
newrow.79	80	74560	5880	0	13790	100	100	100	100	100	100	65960	56380	75540	Inf		Inf	0.941	0.865	1024	66.670 \\
newrow.80	81	84	2940	0	8620	100	100	100	100	100	100	65260	55690	74840	Inf		Inf	0.971	0.915	1029	65.620 \\
\

## Sheet: P1(13)P3
Supplementary Table S4-D: P1(13)P3 – ROC curve of OTML for cutoff 13 muts/Mb by FO
Value P1 (Foundation One) ≥ 13 muts/Mb versus P3 (OTML)
ROC -Asymptotic Normal--
Obs Area Std. Err. [95% Conf. Interval]
------------------------------------------------------------
96 0.8648 0.0400 0.78634 0.94326
Optimal cutoff
. cutpt P1FoundationOne_mas13 P3Thermo
Empirical cut-off point estimation
Method: Liu
Reference variable: P1FoundationOne_mas13 (0=neg, 1=pos)
Classification variable: P3Thermo
Empirical optimal cut-off point: 13.326187
Sensitivity at cut-off point: 0.79
Specificity at cut-off point: 0.85
Area under ROC curve at cut-off point: 0.82
	j	cut	sensitivity	lower 95% CI	upper 95% CI	Specificity	lower 95% CI	upper 95% CI	Positive predictive value	lower 95% CI	upper 95% CI	Negative predictive value	lower 95% CI	upper 95% CI	likelihood ratio positive	lower 95% CI	upper 95% CI	likelihood ratio negative	lower 95% CI	upper 95% CI	accuracy
newrow	1	0	100	100	100	0	0	0	35420	25850	44980				1	1	1				35.420 \\
newrow.1	2	1680	100	100	100	1610	0	4750	35790	26150	45430	100	100	100	1016	0.984	1049	0	0		36.460 \\
newrow.2	3	2520	100	100	100	3230	0	7620	36170	26460	45880	100	100	100	1033	0.988	1081	0	0		37.500 \\
newrow.3	4	2540	100	100	100	4840	0	10180	36560	26770	46350	100	100	100	1051	0.994	1112	0	0		38.540 \\
newrow.4	5	2550	100	100	100	6450	0.340	12570	36960	27090	46820	100	100	100	1069	1001	1141	0	0		39.580 \\
newrow.5	6	3360	100	100	100	8060	1290	14840	37360	27420	47300	100	100	100	1088	1010	1171	0	0		40.620 \\
newrow.6	7	3370	100	100	100	11290	3410	19170	38200	28110	48300	100	100	100	1127	1032	1232	0	0		42.710 \\
newrow.7	8	3380	100	100	100	14520	5750	23280	39080	28830	49330	100	100	100	1170	1056	1296	0	0		44.790 \\
newrow.8	9	4210	100	100	100	17740	8230	27250	40	29590	50410	100	100	100	1216	1083	1365	0	0		46.880 \\
newrow.9	10	4230	100	100	100	20970	10830	31100	40960	30380	51540	100	100	100	1265	1113	1438	0	0		48.960 \\
newrow.10	11	5040	100	100	100	22580	12170	32990	41460	30800	52130	100	100	100	1292	1129	1478	0	0		50 \\
newrow.11	12	5050	100	100	100	24190	13530	34850	41980	31230	52720	100	100	100	1319	1146	1518	0	0		51.040 \\
newrow.12	13	5060	100	100	100	25810	14910	36700	42500	31670	53330	100	100	100	1348	1164	1561	0	0		52.080 \\
newrow.13	14	5070	97060	91380	100	25810	14910	36700	41770	30900	52650	94120	82930	100	1308	1117	1532	0.114	0.016	0.822	51.040 \\
newrow.14	15	5090	97060	91380	100	27420	16320	38520	42310	31340	53270	94440	83860	100	1337	1135	1575	0.107	0.015	0.771	52.080 \\
newrow.15	16	5110	97060	91380	100	30650	19170	42120	43420	32280	54560	95	85450	100	1400	1174	1668	0.096	0.013	0.686	54.170 \\
newrow.16	17	5870	97060	91380	100	32260	20620	43890	44	32770	55230	95240	86130	100	1433	1195	1718	0.091	0.013	0.650	55.210 \\
newrow.17	18	5880	97060	91380	100	33870	22090	45650	44590	33270	55920	95450	86750	100	1468	1217	1770	0.087	0.012	0.618	56.250 \\
newrow.18	19	5890	94120	86210	100	33870	22090	45650	43840	32450	55220	91300	79790	100	1423	1169	1733	0.174	0.043	0.696	55.210 \\
newrow.19	20	5920	94120	86210	100	37100	25070	49120	45070	33500	56640	92	81370	100	1496	1214	1844	0.158	0.040	0.632	57.290 \\
newrow.20	21	5980	94120	86210	100	38710	26590	50830	45710	34040	57380	92310	82070	100	1536	1239	1904	0.152	0.038	0.604	58.330 \\
newrow.21	22	6720	91180	81640	100	38710	26590	50830	44930	33190	56660	88890	77030	100	1488	1189	1861	0.228	0.074	0.702	57.290 \\
newrow.22	23	6730	91180	81640	100	40320	28110	52530	45590	33750	57430	89290	77830	100	1528	1214	1922	0.219	0.071	0.672	58.330 \\
newrow.23	24	6740	91180	81640	100	43550	31210	55890	46970	34930	59010	90	79260	100	1615	1268	2058	0.202	0.066	0.619	60.420 \\
newrow.24	25	6760	91180	81640	100	45160	32770	57550	47690	35550	59830	90320	79920	100	1663	1296	2133	0.195	0.064	0.596	61.460 \\
newrow.25	26	7560	91180	81640	100	46770	34350	59190	48440	36190	60680	90620	80530	100	1713	1326	2212	0.189	0.062	0.574	62.500 \\
newrow.26	27	7590	91180	81640	100	50	37550	62450	50	37550	62450	91180	81640	100	1824	1392	2389	0.176	0.058	0.535	64.580 \\
newrow.27	28	8360	91180	81640	100	51610	39170	64050	50820	38270	63370	91430	82150	100	1884	1428	2487	0.171	0.056	0.517	65.620 \\
newrow.28	29	8380	91180	81640	100	53230	40810	65650	51670	39020	64310	91670	82640	100	1950	1466	2593	0.166	0.055	0.500	66.670 \\
newrow.29	30	8390	88240	77410	99070	53230	40810	65650	50850	38090	63600	89190	79180	99190	1887	1408	2528	0.221	0.086	0.571	65.620 \\
newrow.30	31	8410	88240	77410	99070	54840	42450	67230	51720	38860	64580	89470	79720	99230	1954	1447	2639	0.214	0.083	0.553	66.670 \\
newrow.31	32	8430	88240	77410	99070	56450	44110	68790	52630	39670	65590	89740	80220	99270	2026	1488	2759	0.208	0.081	0.537	67.710 \\
newrow.32	33	8450	88240	77410	99070	58060	45780	70350	53570	40510	66630	90	80700	99300	2104	1532	2890	0.202	0.079	0.521	68.750 \\
newrow.33	34	9210	88240	77410	99070	59680	47470	71890	54550	41390	67700	90240	81160	99330	2188	1578	3034	0.197	0.077	0.506	69.790 \\
newrow.34	35	9240	88240	77410	99070	61290	49170	73410	55560	42300	68810	90480	81600	99350	2280	1628	3191	0.192	0.075	0.492	70.830 \\
newrow.35	36	9260	85290	73390	97200	61290	49170	73410	54720	41320	68120	88370	78790	97950	2203	1564	3105	0.240	0.104	0.552	69.790 \\
newrow.36	37	9280	85290	73390	97200	64520	52610	76430	56860	43270	70460	88890	79710	98070	2404	1671	3458	0.228	0.099	0.523	71.880 \\
newrow.37	38	9300	85290	73390	97200	66130	54350	77910	58	44320	71680	89130	80140	98130	2518	1731	3663	0.222	0.097	0.509	72.920 \\
newrow.38	39	9310	85290	73390	97200	67740	56110	79380	59180	45420	72950	89360	80550	98180	2644	1796	3892	0.217	0.095	0.497	73.960 \\
newrow.39	40	10080	85290	73390	97200	69350	57880	80830	60420	46580	74250	89580	80940	98230	2783	1866	4150	0.212	0.093	0.485	75 \\
newrow.40	41	10090	85290	73390	97200	70970	59670	82270	61700	47800	75600	89800	81320	98270	2938	1943	4442	0.207	0.091	0.473	76.040 \\
newrow.41	42	10150	85290	73390	97200	72580	61480	83680	63040	49090	76990	90	81680	98320	3111	2027	4774	0.203	0.089	0.462	77.080 \\
newrow.42	43	10160	85290	73390	97200	74190	63300	85090	64440	50460	78430	90200	82030	98360	3304	2119	5154	0.198	0.087	0.452	78.120 \\
newrow.43	44	10200	85290	73390	97200	75810	65150	86470	65910	51900	79920	90380	82370	98400	3526	2221	5598	0.194	0.085	0.441	79.170 \\
newrow.44	45	10900	85290	73390	97200	77420	67010	87830	67440	53440	81450	90570	82700	98440	3777	2334	6114	0.190	0.084	0.432	80.210 \\
newrow.45	46	11730	82350	69540	95170	77420	67010	87830	66670	52410	80920	88890	80510	97270	3647	2242	5932	0.228	0.109	0.477	79.170 \\
newrow.46	47	11770	79410	65820	93	77420	67010	87830	65850	51340	80370	87270	78460	96080	3517	2151	5750	0.266	0.136	0.522	78.120 \\
newrow.47	48	11820	79410	65820	93	79030	68900	89170	67500	52990	82010	87500	78840	96160	3787	2268	6323	0.260	0.133	0.510	79.170 \\
newrow.48	49	12600	79410	65820	93	80650	70810	90480	69230	54750	83720	87720	79200	96240	4104	2401	7015	0.255	0.130	0.500	80.210 \\
newrow.49	50	12760	79410	65820	93	82260	72750	91770	71050	56630	85470	87930	79550	96310	4476	2550	7857	0.250	0.128	0.489	81.250 \\
newrow.50	51	13220	79410	65820	93	83870	74720	93030	72970	58660	87280	88140	79880	96390	4923	2721	8907	0.246	0.126	0.479	82.290 \\
newrow.51	52	13430	79410	65820	93	85480	76720	94250	75	60860	89140	88330	80210	96460	5469	2919	10246	0.241	0.124	0.470	83.330 \\
newrow.52	53	13450	76470	62210	90730	85480	76720	94250	74290	59810	88770	86890	78410	95360	5266	2799	9910	0.275	0.149	0.509	82.290 \\
newrow.53	54	13490	73530	58700	88360	87100	78750	95440	75760	61140	90380	85710	77070	94360	5700	2895	11222	0.304	0.172	0.536	82.290 \\
newrow.54	55	13520	70590	55270	85900	87100	78750	95440	75	60	90	84380	75480	93270	5472	2766	10825	0.338	0.199	0.573	81.250 \\
newrow.55	56	13530	67650	51920	83370	87100	78750	95440	74190	58790	89600	83080	73960	92190	5244	2638	10427	0.371	0.226	0.610	80.210 \\
newrow.56	57	14250	64710	48640	80770	87100	78750	95440	73330	57510	89160	81820	72510	91120	5016	2509	10028	0.405	0.254	0.645	79.170 \\
newrow.57	58	14290	61760	45430	78100	87100	78750	95440	72410	56150	88680	80600	71130	90070	4788	2381	9629	0.439	0.283	0.680	78.120 \\
newrow.58	59	14340	58820	42280	75370	87100	78750	95440	71430	54700	88160	79410	69800	89020	4560	2252	9230	0.473	0.313	0.715	77.080 \\
newrow.59	60	15100	55880	39190	72570	87100	78750	95440	70370	53150	87590	78260	68530	87990	4332	2125	8832	0.506	0.343	0.748	76.040 \\
newrow.60	61	15440	55880	39190	72570	88710	80830	96590	73080	56030	90130	78570	68960	88180	4949	2317	10573	0.497	0.337	0.734	77.080 \\
newrow.61	62	15970	55880	39190	72570	90320	82960	97680	76	59260	92740	78870	69380	88370	5773	2550	13068	0.488	0.332	0.719	78.120 \\
newrow.62	63	16840	52940	36160	69720	91940	85160	98710	78260	61400	95120	78080	68590	87570	6568	2675	16127	0.512	0.356	0.737	78.120 \\
newrow.63	64	16870	52940	36160	69720	93550	87430	99660	81820	65700	97940	78380	69	87760	8208	3021	22299	0.503	0.350	0.723	79.170 \\
newrow.64	65	16960	52940	36160	69720	95160	89820	100	85710	70750	100	78670	69400	87940	10938	3469	34492	0.494	0.345	0.709	80.210 \\
newrow.65	66	17670	52940	36160	69720	96770	92380	100	90	76850	100	78950	69780	88110	16390	4043	66446	0.486	0.340	0.697	81.250 \\
newrow.66	67	17760	50	33190	66810	96770	92380	100	89470	75670	100	77920	68660	87190	15480	3801	63038	0.517	0.368	0.725	80.210 \\
newrow.67	68	18480	47060	30280	63840	96770	92380	100	88890	74370	100	76920	67570	86270	14570	3560	59630	0.547	0.397	0.754	79.170 \\
newrow.68	69	19340	44120	27430	60810	96770	92380	100	88240	72920	100	75950	66520	85370	13659	3319	56222	0.578	0.427	0.781	78.120 \\
newrow.69	70	20280	44120	27430	60810	98390	95250	100	93750	81890	100	76250	66920	85580	27404	3781	198601	0.568	0.421	0.767	79.170 \\
newrow.70	71	20300	41180	24630	57720	98390	95250	100	93330	80710	100	75310	65920	84700	25578	3513	186224	0.598	0.450	0.793	78.120 \\
newrow.71	72	21300	41180	24630	57720	100	100	100	100	100	100	75610	66310	84900	Inf		Inf	0.588	0.444	0.779	79.170 \\
newrow.72	73	22670	38240	21900	54570	100	100	100	100	100	100	74700	65350	84050	Inf		Inf	0.618	0.474	0.805	78.120 \\
newrow.73	74	22700	35290	19230	51360	100	100	100	100	100	100	73810	64410	83210	Inf		Inf	0.647	0.505	0.829	77.080 \\
newrow.74	75	23470	32350	16630	48080	100	100	100	100	100	100	72940	63500	82390	Inf		Inf	0.676	0.536	0.854	76.040 \\
newrow.75	76	23540	29410	14100	44730	100	100	100	100	100	100	72090	62610	81570	Inf		Inf	0.706	0.568	0.877	75 \\
newrow.76	77	27750	26470	11640	41300	100	100	100	100	100	100	71260	61760	80770	Inf		Inf	0.735	0.601	0.900	73.960 \\
newrow.77	78	27990	23530	9270	37790	100	100	100	100	100	100	70450	60920	79990	Inf		Inf	0.765	0.635	0.921	72.920 \\
newrow.78	79	32970	20590	7	34180	100	100	100	100	100	100	69660	60110	79210	Inf		Inf	0.794	0.669	0.942	71.880 \\
newrow.79	80	34420	17650	4830	30460	100	100	100	100	100	100	68890	59320	78450	Inf		Inf	0.824	0.705	0.962	70.830 \\
newrow.80	81	40340	14710	2800	26610	100	100	100	100	100	100	68130	58560	77710	Inf		Inf	0.853	0.742	0.981	69.790 \\
newrow.81	82	45180	11760	0.930	22590	100	100	100	100	100	100	67390	57810	76970	Inf		Inf	0.882	0.780	0.998	68.750 \\
newrow.82	83	50450	8820	0	18360	100	100	100	100	100	100	66670	57090	76250	Inf		Inf	0.912	0.821	1012	67.710 \\
newrow.83	84	55500	5880	0	13790	100	100	100	100	100	100	65960	56380	75540	Inf		Inf	0.941	0.865	1024	66.670 \\
newrow.84	85	59790	2940	0	8620	100	100	100	100	100	100	65260	55690	74840	Inf		Inf	0.971	0.915	1029	65.620 \\
\

## Sheet: P1(16)P2
Supplementary Table S4-E: P1(16)P2 – ROC curve of TSO500 for cutoff 16 muts/Mb by FO
Value P1 (Foundation One) ≥ 16 muts/Mb versus P2 (TSO500)
ROC -Asymptotic Normal--
Obs Area Std. Err. [95% Conf. Interval]
------------------------------------------------------------
96 0.9082 0.0403 0.82928 0.98714
Optimal cutoff
. cutpt P1FoundationOne_mas16 P2Illumina
Empirical cut-off point estimation
Method: Liu
Reference variable: P1FoundationOne_mas16 (0=neg, 1=pos)
Classification variable: P2Illumina
Empirical optimal cut-off point: 10.622
Sensitivity at cut-off point: 0.89
Specificity at cut-off point: 0.83
Area under ROC curve at cut-off point: 0.86
	j	cut	sensitivity	lower 95% CI	upper 95% CI	Specificity	lower 95% CI	upper 95% CI	Positive predictive value	lower 95% CI	upper 95% CI	Negative predictive value	lower 95% CI	upper 95% CI	likelihood ratio positive	lower 95% CI	upper 95% CI	likelihood ratio negative	lower 95% CI	upper 95% CI	accuracy
newrow	1	0.780	100	100	100	0	0	0	28120	19130	37120				1	1	1				28.120 \\
newrow.1	2	0.790	100	100	100	1450	0	4270	28420	19350	37490	100	100	100	1015	0.986	1044	0	0		29.170 \\
newrow.2	3	1570	100	100	100	2900	0	6860	28720	19580	37870	100	100	100	1030	0.989	1073	0	0		30.210 \\
newrow.3	4	1580	96300	89170	100	7250	1130	13360	28890	19520	38250	83330	53510	100	1038	0.940	1147	0.510	0.062	4169	32.290 \\
newrow.4	5	1620	96300	89170	100	8700	2050	15340	29210	19770	38660	85710	59790	100	1055	0.951	1170	0.425	0.054	3370	33.330 \\
newrow.5	6	2350	96300	89170	100	10140	3020	17270	29550	20010	39080	87500	64580	100	1072	0.962	1194	0.365	0.047	2828	34.380 \\
newrow.6	7	2360	96300	89170	100	13040	5100	20990	30230	20530	39940	90	71410	100	1107	0.985	1246	0.284	0.038	2134	36.460 \\
newrow.7	8	2370	96300	89170	100	14490	6190	22800	30590	20790	40380	90910	73920	100	1126	0.997	1272	0.255	0.034	1900	37.500 \\
newrow.8	9	3140	96300	89170	100	15940	7300	24580	30950	21070	40840	91670	76030	100	1146	1009	1300	0.232	0.032	1712	38.540 \\
newrow.9	10	3150	96300	89170	100	18840	9610	28070	31710	21640	41780	92860	79370	100	1187	1036	1359	0.196	0.027	1429	40.620 \\
newrow.10	11	3220	96300	89170	100	20290	10800	29780	32100	21930	42270	93330	80710	100	1208	1050	1390	0.182	0.025	1320	41.670 \\
newrow.11	12	3860	96300	89170	100	21740	12010	31470	32500	22240	42760	93750	81890	100	1230	1065	1422	0.170	0.024	1226	42.710 \\
newrow.12	13	3920	96300	89170	100	23190	13230	33150	32910	22550	43270	94120	82930	100	1254	1080	1456	0.160	0.022	1145	43.750 \\
newrow.13	14	3930	96300	89170	100	26090	15730	36450	33770	23200	44330	94740	84700	100	1303	1112	1527	0.142	0.020	1011	45.830 \\
newrow.14	15	4710	96300	89170	100	28990	18280	39690	34670	23900	45440	95240	86130	100	1356	1147	1604	0.128	0.018	0.904	47.920 \\
newrow.15	16	4720	96300	89170	100	31880	20890	42880	35620	24630	46600	95650	87320	100	1414	1184	1688	0.116	0.016	0.819	50 \\
newrow.16	17	4750	96300	89170	100	33330	22210	44460	36110	25020	47210	95830	87840	100	1444	1204	1734	0.111	0.016	0.782	51.040 \\
newrow.17	18	5480	96300	89170	100	34780	23540	46020	36620	25410	47830	96	88320	100	1476	1224	1781	0.106	0.015	0.748	52.080 \\
newrow.18	19	5500	96300	89170	100	36230	24890	47570	37140	25820	48460	96150	88760	100	1510	1246	1831	0.102	0.014	0.717	53.120 \\
newrow.19	20	5550	96300	89170	100	39130	27610	50650	38240	26680	49790	96430	89550	100	1582	1291	1938	0.095	0.014	0.662	55.210 \\
newrow.20	21	5870	96300	89170	100	40580	28990	52170	38810	27140	50470	96550	89910	100	1621	1316	1996	0.091	0.013	0.638	56.250 \\
newrow.21	22	6280	96300	89170	100	42030	30380	53680	39390	27610	51180	96670	90240	100	1661	1341	2058	0.088	0.013	0.614	57.290 \\
newrow.22	23	6330	96300	89170	100	44930	33190	56660	40620	28590	52660	96880	90850	100	1749	1395	2191	0.082	0.012	0.574	59.380 \\
newrow.23	24	6360	96300	89170	100	46380	34610	58140	41270	29110	53430	96970	91120	100	1796	1425	2264	0.080	0.012	0.555	60.420 \\
newrow.24	25	7050	96300	89170	100	47830	36040	59610	41940	29650	54220	97060	91380	100	1846	1455	2341	0.077	0.011	0.538	61.460 \\
newrow.25	26	7070	96300	89170	100	50720	38930	62520	43330	30790	55870	97220	91850	100	1954	1521	2510	0.073	0.010	0.506	63.540 \\
newrow.26	27	7830	96300	89170	100	52170	40390	63960	44070	31400	56740	97300	92070	100	2013	1557	2604	0.071	0.010	0.492	64.580 \\
newrow.27	28	7840	96300	89170	100	55070	43340	66810	45610	32680	58540	97440	92480	100	2143	1634	2812	0.067	0.010	0.465	66.670 \\
newrow.28	29	7850	96300	89170	100	56520	44820	68220	46430	33370	59490	97500	92660	100	2215	1676	2928	0.066	0.010	0.453	67.710 \\
newrow.29	30	7870	96300	89170	100	57970	46320	69620	47270	34080	60470	97560	92840	100	2291	1720	3052	0.064	0.009	0.441	68.750 \\
newrow.30	31	7950	96300	89170	100	59420	47830	71010	48150	34820	61470	97620	93010	100	2373	1767	3187	0.062	0.009	0.431	69.790 \\
newrow.31	32	8410	96300	89170	100	60870	49350	72390	49060	35600	62520	97670	93170	100	2461	1817	3333	0.061	0.009	0.420	70.830 \\
newrow.32	33	8610	92590	82710	100	60870	49350	72390	48080	34500	61660	95450	89300	100	2366	1730	3236	0.122	0.032	0.468	69.790 \\
newrow.33	34	8620	92590	82710	100	62320	50880	73750	49020	35300	62740	95560	89530	100	2457	1781	3390	0.119	0.031	0.457	70.830 \\
newrow.34	35	8630	92590	82710	100	63770	52430	75110	50	36140	63860	95650	89760	100	2556	1836	3557	0.116	0.030	0.446	71.880 \\
newrow.35	36	8640	92590	82710	100	65220	53980	76460	51020	37020	65020	95740	89970	100	2662	1894	3741	0.114	0.030	0.436	72.920 \\
newrow.36	37	9	92590	82710	100	66670	55540	77790	52080	37950	66220	95830	90180	100	2778	1957	3943	0.111	0.029	0.426	73.960 \\
newrow.37	38	9390	92590	82710	100	68120	57120	79110	53190	38930	67460	95920	90380	100	2904	2024	4167	0.109	0.028	0.417	75 \\
newrow.38	39	9430	92590	82710	100	69570	58710	80420	54350	39950	68740	96	90570	100	3043	2097	4415	0.106	0.028	0.408	76.040 \\
newrow.39	40	9490	92590	82710	100	71010	60310	81720	55560	41040	70070	96080	90750	100	3194	2175	4691	0.104	0.027	0.400	77.080 \\
newrow.40	41	10050	92590	82710	100	72460	61920	83	56820	42180	71450	96150	90930	100	3362	2260	5002	0.102	0.027	0.391	78.120 \\
newrow.41	42	10190	88890	77030	100	72460	61920	83	55810	40970	70660	94340	88120	100	3228	2152	4841	0.153	0.052	0.450	77.080 \\
newrow.42	43	10200	88890	77030	100	73910	63550	84270	57140	42180	72110	94440	88330	100	3407	2241	5180	0.150	0.051	0.441	78.120 \\
newrow.43	44	10210	88890	77030	100	75360	65200	85530	58540	43460	73620	94550	88540	100	3607	2338	5566	0.147	0.050	0.432	79.170 \\
newrow.44	45	10220	88890	77030	100	78260	68530	87990	61540	46270	76810	94740	88940	100	4089	2563	6523	0.142	0.048	0.416	81.250 \\
newrow.45	46	10240	88890	77030	100	79710	70220	89200	63160	47820	78490	94830	89130	100	4381	2694	7125	0.139	0.048	0.408	82.290 \\
newrow.46	47	10250	88890	77030	100	81160	71930	90390	64860	49480	80250	94920	89310	100	4718	2840	7838	0.137	0.047	0.400	83.330 \\
newrow.47	48	10990	88890	77030	100	82610	73670	91550	66670	51270	82070	95	89490	100	5112	3005	8695	0.134	0.046	0.393	84.380 \\
newrow.48	49	11780	85190	71790	98580	82610	73670	91550	65710	49990	81440	93440	87230	99650	4899	2861	8388	0.179	0.072	0.446	83.330 \\
newrow.49	50	11950	85190	71790	98580	84060	75420	92700	67650	51920	83370	93550	87430	99660	5344	3040	9396	0.176	0.071	0.438	84.380 \\
newrow.50	51	12570	81480	66830	96130	84060	75420	92700	66670	50580	82750	92060	85390	98740	5112	2888	9047	0.220	0.099	0.489	83.330 \\
newrow.51	52	12580	81480	66830	96130	85510	77200	93810	68750	52690	84810	92190	85610	98760	5623	3084	10253	0.217	0.098	0.481	84.380 \\
newrow.52	53	12840	81480	66830	96130	86960	79010	94900	70970	54990	86950	92310	85830	98790	6248	3311	11794	0.213	0.096	0.472	85.420 \\
newrow.53	54	13330	77780	62100	93460	86960	79010	94900	70	53600	86400	90910	83970	97840	5965	3140	11332	0.256	0.125	0.520	84.380 \\
newrow.54	55	13350	77780	62100	93460	88410	80850	95960	72410	56150	88680	91040	84210	97880	6711	3393	13274	0.251	0.123	0.512	85.420 \\
newrow.55	56	13370	77780	62100	93460	92750	86640	98870	80770	65620	95920	91430	84870	97990	10728	4504	25554	0.240	0.118	0.487	88.540 \\
newrow.56	57	13840	74070	57540	90600	92750	86640	98870	80	64320	95680	90140	83210	97080	10217	4267	24463	0.280	0.147	0.531	87.500 \\
newrow.57	58	14820	70370	53150	87590	92750	86640	98870	79170	62920	95410	88890	81630	96150	9706	4030	23376	0.320	0.178	0.574	86.460 \\
newrow.58	59	15340	70370	53150	87590	94200	88690	99720	82610	67120	98100	89040	81880	96210	12133	4544	32397	0.314	0.175	0.564	87.500 \\
newrow.59	60	15470	70370	53150	87590	95650	90840	100	86360	72020	100	89190	82110	96260	16177	5208	50252	0.310	0.173	0.555	88.540 \\
newrow.60	61	15890	66670	48890	84450	95650	90840	100	85710	70750	100	88	80650	95350	15326	4910	47846	0.348	0.204	0.596	87.500 \\
newrow.61	62	16450	62960	44750	81180	95650	90840	100	85	69350	100	86840	79240	94440	14474	4611	45433	0.387	0.236	0.635	86.460 \\
newrow.62	63	17240	62960	44750	81180	97100	93140	100	89470	75670	100	87010	79500	94520	21710	5375	87688	0.382	0.233	0.625	87.500 \\
newrow.63	64	17290	59260	40730	77790	97100	93140	100	88890	74370	100	85900	78170	93620	20434	5034	82952	0.420	0.266	0.662	86.460 \\
newrow.64	65	18090	55560	36810	74300	97100	93140	100	88240	72920	100	84810	76900	92720	19159	4693	78217	0.458	0.300	0.699	85.420 \\
newrow.65	66	19430	51850	33010	70700	97100	93140	100	87500	71300	100	83750	75670	91830	17879	4351	73470	0.496	0.335	0.735	84.380 \\
newrow.66	67	21930	51850	33010	70700	98550	95730	100	93330	80710	100	83950	75960	91940	35759	4940	258835	0.489	0.330	0.723	85.420 \\
newrow.67	68	21970	48150	29300	66990	98550	95730	100	92860	79370	100	82930	74780	91070	33207	4563	241647	0.526	0.365	0.758	84.380 \\
newrow.68	69	22080	44440	25700	63190	98550	95730	100	92310	77820	100	81930	73650	90210	30648	4186	224415	0.564	0.402	0.791	83.330 \\
newrow.69	70	24340	40740	22210	59270	98550	95730	100	91670	76030	100	80950	72560	89350	28097	3809	207237	0.601	0.439	0.823	82.290 \\
newrow.70	71	25	37040	18820	55250	98550	95730	100	90910	73920	100	80	71500	88500	25545	3433	190064	0.639	0.478	0.854	81.250 \\
newrow.71	72	27470	33330	15550	51110	98550	95730	100	90	71410	100	79070	70470	87670	22986	3057	172852	0.676	0.517	0.885	80.210 \\
newrow.72	73	34800	33330	15550	51110	100	100	100	100	100	100	79310	70800	87820	Inf		Inf	0.667	0.511	0.870	81.250 \\
newrow.73	74	36240	29630	12410	46850	100	100	100	100	100	100	78410	69810	87010	Inf		Inf	0.704	0.551	0.899	80.210 \\
newrow.74	75	41580	25930	9400	42460	100	100	100	100	100	100	77530	68860	86200	Inf		Inf	0.741	0.592	0.926	79.170 \\
newrow.75	76	43010	22220	6540	37900	100	100	100	100	100	100	76670	67930	85400	Inf		Inf	0.778	0.636	0.952	78.120 \\
newrow.76	77	51650	18520	3870	33170	100	100	100	100	100	100	75820	67030	84620	Inf		Inf	0.815	0.681	0.975	77.080 \\
newrow.77	78	54840	14810	1420	28210	100	100	100	100	100	100	75	66150	83850	Inf		Inf	0.852	0.728	0.997	76.040 \\
newrow.78	79	61710	11110	0	22970	100	100	100	100	100	100	74190	65300	83090	Inf		Inf	0.889	0.778	1016	75 \\
newrow.79	80	74560	7410	0	17290	100	100	100	100	100	100	73400	64470	82340	Inf		Inf	0.926	0.832	1030	73.960 \\
newrow.80	81	84	3700	0	10830	100	100	100	100	100	100	72630	63670	81600	Inf		Inf	0.963	0.894	1037	72.920 \\
\hline \\

## Sheet: P1(16)P3
Supplementary Table S4-F: P1(16)P3 – ROC curve of OTML for cutoff 16 muts/Mb by FO
Value P1 (Foundation One) ≥ 16 muts/Mb versus P3 (OTML)
ROC -Asymptotic Normal--
Obs Area Std. Err. [95% Conf. Interval]
------------------------------------------------------------
96 0.8728 0.0430 0.78851 0.95706
Optimal cutoff
. cutpt P1FoundationOne_mas16 P3Thermo
Empirical cut-off point estimation
Method: Liu
Reference variable: P1FoundationOne_mas16 (0=neg, 1=pos)
Classification variable: P3Thermo
Empirical optimal cut-off point: 13.506308
Sensitivity at cut-off point: 0.78
Specificity at cut-off point: 0.84
Area under ROC curve at cut-off point: 0.81
	j	cut	sensitivity	lower 95% CI	upper 95% CI	Specificity	lower 95% CI	upper 95% CI	Positive predictive value	lower 95% CI	upper 95% CI	Negative predictive value	lower 95% CI	upper 95% CI	likelihood ratio positive	lower 95% CI	upper 95% CI	likelihood ratio negative	lower 95% CI	upper 95% CI	accuracy
newrow	1	0	100	100	100	0	0	0	28120	19130	37120				1	1	1				28.120 \\
newrow.1	2	1680	100	100	100	1450	0	4270	28420	19350	37490	100	100	100	1015	0.986	1044	0	0		29.170 \\
newrow.2	3	2520	100	100	100	2900	0	6860	28720	19580	37870	100	100	100	1030	0.989	1073	0	0		30.210 \\
newrow.3	4	2540	100	100	100	4350	0	9160	29030	19810	38260	100	100	100	1046	0.994	1099	0	0		31.250 \\
newrow.4	5	2550	100	100	100	5800	0.280	11310	29350	20040	38650	100	100	100	1062	1001	1126	0	0		32.290 \\
newrow.5	6	3360	100	100	100	7250	1130	13360	29670	20280	39060	100	100	100	1078	1009	1152	0	0		33.330 \\
newrow.6	7	3370	100	100	100	10140	3020	17270	30340	20790	39890	100	100	100	1113	1028	1205	0	0		35.420 \\
newrow.7	8	3380	100	100	100	13040	5100	20990	31030	21310	40760	100	100	100	1150	1050	1260	0	0		37.500 \\
newrow.8	9	4210	100	100	100	15940	7300	24580	31760	21870	41660	100	100	100	1190	1073	1318	0	0		39.580 \\
newrow.9	10	4230	100	100	100	18840	9610	28070	32530	22450	42610	100	100	100	1232	1100	1380	0	0		41.670 \\
newrow.10	11	5040	100	100	100	20290	10800	29780	32930	22760	43100	100	100	100	1254	1114	1413	0	0		42.710 \\
newrow.11	12	5050	100	100	100	21740	12010	31470	33330	23070	43600	100	100	100	1278	1128	1447	0	0		43.750 \\
newrow.12	13	5060	100	100	100	23190	13230	33150	33750	23390	44110	100	100	100	1302	1144	1482	0	0		44.790 \\
newrow.13	14	5070	96300	89170	100	23190	13230	33150	32910	22550	43270	94120	82930	100	1254	1080	1456	0.160	0.022	1145	43.750 \\
newrow.14	15	5090	96300	89170	100	24640	14470	34800	33330	22870	43790	94440	83860	100	1278	1096	1490	0.150	0.021	1074	44.790 \\
newrow.15	16	5110	96300	89170	100	27540	17	38080	34210	23540	44880	95	85450	100	1329	1129	1565	0.134	0.019	0.955	46.880 \\
newrow.16	17	5870	96300	89170	100	28990	18280	39690	34670	23900	45440	95240	86130	100	1356	1147	1604	0.128	0.018	0.904	47.920 \\
newrow.17	18	5880	96300	89170	100	30430	19580	41290	35140	24260	46010	95450	86750	100	1384	1165	1645	0.122	0.017	0.860	48.960 \\
newrow.18	19	5890	96300	89170	100	31880	20890	42880	35620	24630	46600	95650	87320	100	1414	1184	1688	0.116	0.016	0.819	50 \\
newrow.19	20	5920	96300	89170	100	34780	23540	46020	36620	25410	47830	96	88320	100	1476	1224	1781	0.106	0.015	0.748	52.080 \\
newrow.20	21	5980	96300	89170	100	36230	24890	47570	37140	25820	48460	96150	88760	100	1510	1246	1831	0.102	0.014	0.717	53.120 \\
newrow.21	22	6720	92590	82710	100	36230	24890	47570	36230	24890	47570	92590	82710	100	1452	1180	1786	0.204	0.052	0.805	52.080 \\
newrow.22	23	6730	92590	82710	100	37680	26250	49120	36760	25300	48220	92860	83320	100	1486	1202	1837	0.197	0.050	0.772	53.120 \\
newrow.23	24	6740	92590	82710	100	40580	28990	52170	37880	26180	49580	93330	84410	100	1558	1248	1946	0.183	0.047	0.714	55.210 \\
newrow.24	25	6760	92590	82710	100	42030	30380	53680	38460	26630	50290	93550	84900	100	1597	1272	2005	0.176	0.045	0.688	56.250 \\
newrow.25	26	7560	92590	82710	100	43480	31780	55180	39060	27110	51020	93750	85360	100	1638	1298	2068	0.170	0.044	0.664	57.290 \\
newrow.26	27	7590	92590	82710	100	46380	34610	58140	40320	28110	52530	94120	86210	100	1727	1353	2204	0.160	0.041	0.621	59.380 \\
newrow.27	28	8360	92590	82710	100	47830	36040	59610	40980	28640	53330	94290	86600	100	1775	1382	2279	0.155	0.040	0.601	60.420 \\
newrow.28	29	8380	92590	82710	100	49280	37480	61070	41670	29190	54140	94440	86960	100	1825	1413	2358	0.150	0.039	0.583	61.460 \\
newrow.29	30	8390	88890	77030	100	49280	37480	61070	40680	28140	53210	91890	83100	100	1753	1340	2292	0.225	0.076	0.673	60.420 \\
newrow.30	31	8410	88890	77030	100	50720	38930	62520	41380	28700	54050	92110	83530	100	1804	1371	2372	0.219	0.074	0.653	61.460 \\
newrow.31	32	8430	88890	77030	100	52170	40390	63960	42110	29290	54920	92310	83940	100	1858	1404	2459	0.213	0.072	0.634	62.500 \\
newrow.32	33	8450	88890	77030	100	53620	41860	65390	42860	29900	55820	92500	84340	100	1917	1439	2553	0.207	0.070	0.616	63.540 \\
newrow.33	34	9210	88890	77030	100	55070	43340	66810	43640	30530	56740	92680	84710	100	1978	1476	2653	0.202	0.068	0.599	64.580 \\
newrow.34	35	9240	88890	77030	100	56520	44820	68220	44440	31190	57700	92860	85070	100	2044	1514	2760	0.197	0.066	0.583	65.620 \\
newrow.35	36	9260	88890	77030	100	57970	46320	69620	45280	31880	58680	93020	85410	100	2115	1555	2876	0.192	0.065	0.568	66.670 \\
newrow.36	37	9280	88890	77030	100	60870	49350	72390	47060	33360	60760	93330	86050	100	2272	1645	3138	0.182	0.062	0.539	68.750 \\
newrow.37	38	9300	88890	77030	100	62320	50880	73750	48	34150	61850	93480	86340	100	2359	1694	3286	0.178	0.060	0.526	69.790 \\
newrow.38	39	9310	88890	77030	100	63770	52430	75110	48980	34980	62980	93620	86630	100	2454	1746	3448	0.174	0.059	0.514	70.830 \\
newrow.39	40	10080	88890	77030	100	65220	53980	76460	50	35860	64140	93750	86900	100	2556	1802	3625	0.170	0.058	0.502	71.880 \\
newrow.40	41	10090	88890	77030	100	66670	55540	77790	51060	36770	65360	93880	87160	100	2667	1862	3820	0.167	0.057	0.490	72.920 \\
newrow.41	42	10150	88890	77030	100	68120	57120	79110	52170	37740	66610	94	87420	100	2788	1926	4036	0.163	0.055	0.480	73.960 \\
newrow.42	43	10160	88890	77030	100	69570	58710	80420	53330	38760	67910	94120	87660	100	2921	1996	4275	0.160	0.054	0.469	75 \\
newrow.43	44	10200	88890	77030	100	71010	60310	81720	54550	39830	69260	94230	87890	100	3066	2070	4541	0.156	0.053	0.460	76.040 \\
newrow.44	45	10900	88890	77030	100	72460	61920	83	55810	40970	70660	94340	88120	100	3228	2152	4841	0.153	0.052	0.450	77.080 \\
newrow.45	46	11730	85190	71790	98580	72460	61920	83	54760	39710	69810	92590	85610	99580	3093	2045	4679	0.204	0.082	0.511	76.040 \\
newrow.46	47	11770	81480	66830	96130	72460	61920	83	53660	38390	68920	90910	83310	98510	2959	1938	4516	0.256	0.114	0.571	75 \\
newrow.47	48	11820	81480	66830	96130	73910	63550	84270	55	39580	70420	91070	83600	98540	3123	2019	4830	0.251	0.112	0.560	76.040 \\
newrow.48	49	12600	81480	66830	96130	75360	65200	85530	56410	40850	71970	91230	83880	98570	3307	2108	5187	0.246	0.110	0.548	77.080 \\
newrow.49	50	12760	81480	66830	96130	76810	66850	86770	57890	42200	73590	91380	84160	98600	3514	2206	5597	0.241	0.108	0.538	78.120 \\
newrow.50	51	13220	81480	66830	96130	78260	68530	87990	59460	43640	75280	91530	84420	98630	3748	2313	6072	0.237	0.106	0.527	79.170 \\
newrow.51	52	13430	81480	66830	96130	79710	70220	89200	61110	45190	77040	91670	84670	98660	4016	2433	6628	0.232	0.104	0.517	80.210 \\
newrow.52	53	13450	77780	62100	93460	79710	70220	89200	60	43770	76230	90160	82690	97640	3833	2304	6379	0.279	0.136	0.570	79.170 \\
newrow.53	54	13490	77780	62100	93460	82610	73670	91550	63640	47220	80050	90480	83230	97720	4473	2574	7771	0.269	0.132	0.549	81.250 \\
newrow.54	55	13520	77780	62100	93460	84060	75420	92700	65620	49170	82080	90620	83480	97770	4880	2737	8699	0.264	0.130	0.539	82.290 \\
newrow.55	56	13530	74070	57540	90600	84060	75420	92700	64520	47670	81360	89230	81690	96770	4647	2586	8349	0.308	0.162	0.588	81.250 \\
newrow.56	57	14250	70370	53150	87590	84060	75420	92700	63330	46090	80580	87880	80	95750	4415	2436	8000	0.352	0.195	0.636	80.210 \\
newrow.57	58	14290	70370	53150	87590	85510	77200	93810	65520	48220	82820	88060	80300	95820	4856	2604	9057	0.346	0.192	0.625	81.250 \\
newrow.58	59	14340	66670	48890	84450	85510	77200	93810	64290	46540	82030	86760	78710	94820	4601	2445	8658	0.390	0.227	0.670	80.210 \\
newrow.59	60	15100	66670	48890	84450	86960	79010	94900	66670	48890	84450	86960	79010	94900	5113	2629	9942	0.383	0.223	0.659	81.250 \\
newrow.60	61	15440	66670	48890	84450	88410	80850	95960	69230	51490	86970	87140	79300	94980	5752	2845	11631	0.377	0.220	0.647	82.290 \\
newrow.61	62	15970	66670	48890	84450	89860	82730	96980	72	54400	89600	87320	79590	95060	6575	3102	13936	0.371	0.216	0.636	83.330 \\
newrow.62	63	16840	62960	44750	81180	91300	84660	97950	73910	55970	91860	86300	78410	94190	7237	3195	16390	0.406	0.247	0.667	83.330 \\
newrow.63	64	16870	62960	44750	81180	92750	86640	98870	77270	59760	94780	86490	78700	94280	8684	3558	21197	0.399	0.243	0.656	84.380 \\
newrow.64	65	16960	62960	44750	81180	94200	88690	99720	80950	64160	97750	86670	78970	94360	10855	4017	29336	0.393	0.240	0.645	85.420 \\
newrow.65	66	17670	62960	44750	81180	95650	90840	100	85	69350	100	86840	79240	94440	14474	4611	45433	0.387	0.236	0.635	86.460 \\
newrow.66	67	17760	59260	40730	77790	95650	90840	100	84210	67810	100	85710	77900	93530	13623	4313	43027	0.426	0.270	0.673	85.420 \\
newrow.67	68	18480	55560	36810	74300	95650	90840	100	83330	66120	100	84620	76610	92620	12772	4016	40621	0.465	0.304	0.710	84.380 \\
newrow.68	69	19340	51850	33010	70700	95650	90840	100	82350	64230	100	83540	75370	91720	11919	3718	38209	0.503	0.339	0.747	83.330 \\
newrow.69	70	20280	51850	33010	70700	97100	93140	100	87500	71300	100	83750	75670	91830	17879	4351	73470	0.496	0.335	0.735	84.380 \\
newrow.70	71	20300	48150	29300	66990	97100	93140	100	86670	69460	100	82720	74480	90950	16603	4011	68737	0.534	0.370	0.770	83.330 \\
newrow.71	72	21300	48150	29300	66990	98550	95730	100	92860	79370	100	82930	74780	91070	33207	4563	241647	0.526	0.365	0.758	84.380 \\
newrow.72	73	22670	44440	25700	63190	98550	95730	100	92310	77820	100	81930	73650	90210	30648	4186	224415	0.564	0.402	0.791	83.330 \\
newrow.73	74	22700	40740	22210	59270	98550	95730	100	91670	76030	100	80950	72560	89350	28097	3809	207237	0.601	0.439	0.823	82.290 \\
newrow.74	75	23470	37040	18820	55250	98550	95730	100	90910	73920	100	80	71500	88500	25545	3433	190064	0.639	0.478	0.854	81.250 \\
newrow.75	76	23540	37040	18820	55250	100	100	100	100	100	100	80230	71820	88650	Inf		Inf	0.630	0.471	0.841	82.290 \\
newrow.76	77	27750	33330	15550	51110	100	100	100	100	100	100	79310	70800	87820	Inf		Inf	0.667	0.511	0.870	81.250 \\
newrow.77	78	27990	29630	12410	46850	100	100	100	100	100	100	78410	69810	87010	Inf		Inf	0.704	0.551	0.899	80.210 \\
newrow.78	79	32970	25930	9400	42460	100	100	100	100	100	100	77530	68860	86200	Inf		Inf	0.741	0.592	0.926	79.170 \\
newrow.79	80	34420	22220	6540	37900	100	100	100	100	100	100	76670	67930	85400	Inf		Inf	0.778	0.636	0.952	78.120 \\
newrow.80	81	40340	18520	3870	33170	100	100	100	100	100	100	75820	67030	84620	Inf		Inf	0.815	0.681	0.975	77.080 \\
newrow.81	82	45180	14810	1420	28210	100	100	100	100	100	100	75	66150	83850	Inf		Inf	0.852	0.728	0.997	76.040 \\
newrow.82	83	50450	11110	0	22970	100	100	100	100	100	100	74190	65300	83090	Inf		Inf	0.889	0.778	1016	75 \\
newrow.83	84	55500	7410	0	17290	100	100	100	100	100	100	73400	64470	82340	Inf		Inf	0.926	0.832	1030	73.960 \\
newrow.84	85	59790	3700	0	10830	100	100	100	100	100	100	72630	63670	81600	Inf		Inf	0.963	0.894	1037	72.920 \\
\hline \\[-1.8ex]

## Sheet: P1(20)P2
Supplementary Table S4-G: P1(20)P2 – ROC curve of TSO500 for cutoff 20 muts/Mb by FO
Value P1 (Foundation One) ≥ 20 muts/Mb versus P2 (TSO500)
ROC -Asymptotic Normal--
Obs Area Std. Err. [95% Conf. Interval]
------------------------------------------------------------
96 0.9092 0.0589 0.79364 1.00000
Optimal cutoff
Empirical cut-off point estimation
Method: Liu
Reference variable: P1FoundationOne_mas20 (0=neg, 1=pos)
Classification variable: P2Illumina
Empirical optimal cut-off point: 17.261
Sensitivity at cut-off point: 0.82
Specificity at cut-off point: 0.95
Area under ROC curve at cut-off point: 0.89
	j	cut	sensitivity	lower 95% CI	upper 95% CI	Specificity	lower 95% CI	upper 95% CI	Positive predictive value	lower 95% CI	upper 95% CI	Negative predictive value	lower 95% CI	upper 95% CI	likelihood ratio positive	lower 95% CI	upper 95% CI	likelihood ratio negative	lower 95% CI	upper 95% CI	accuracy
newrow	1	0.780	100	100	100	0	0	0	17710	10070	25340				1	1	1				17.710 \\
newrow.1	2	0.790	100	100	100	1270	0	3730	17890	10190	25600	100	100	100	1013	0.988	1039	0	0		18.750 \\
newrow.2	3	1570	100	100	100	2530	0	6	18090	10300	25870	100	100	100	1026	0.990	1063	0	0		19.790 \\
newrow.3	4	1580	94120	82930	100	6330	0.960	11700	17780	9880	25680	83330	53510	100	1005	0.881	1147	0.929	0.116	7451	21.880 \\
newrow.4	5	1620	94120	82930	100	7590	1750	13440	17980	10	25960	85710	59790	100	1018	0.890	1165	0.775	0.100	6025	22.920 \\
newrow.5	6	2350	94120	82930	100	8860	2590	15130	18180	10120	26240	87500	64580	100	1033	0.900	1185	0.664	0.087	5047	23.960 \\
newrow.6	7	2360	94120	82930	100	11390	4390	18400	18600	10380	26830	90	71410	100	1062	0.921	1225	0.516	0.070	3808	26.040 \\
newrow.7	8	2370	94120	82930	100	12660	5330	19990	18820	10510	27130	90910	73920	100	1078	0.932	1246	0.464	0.064	3390	27.080 \\
newrow.8	9	3140	94120	82930	100	13920	6290	21560	19050	10650	27440	91670	76030	100	1093	0.943	1268	0.422	0.058	3056	28.120 \\
newrow.9	10	3150	94120	82930	100	16460	8280	24630	19510	10930	28090	92860	79370	100	1127	0.966	1314	0.357	0.050	2550	30.210 \\
newrow.10	11	3220	94120	82930	100	17720	9300	26140	19750	11080	28420	93330	80710	100	1144	0.978	1338	0.332	0.047	2356	31.250 \\
newrow.11	12	3860	94120	82930	100	18990	10340	27640	20	11230	28770	93750	81890	100	1162	0.990	1363	0.310	0.044	2188	32.290 \\
newrow.12	13	3920	94120	82930	100	20250	11390	29120	20250	11390	29120	94120	82930	100	1180	1003	1389	0.290	0.041	2044	33.330 \\
newrow.13	14	3930	94120	82930	100	22780	13540	32030	20780	11720	29840	94740	84700	100	1219	1030	1443	0.258	0.037	1804	35.420 \\
newrow.14	15	4710	94120	82930	100	25320	15730	34900	21330	12060	30600	95240	86130	100	1260	1058	1501	0.232	0.033	1614	37.500 \\
newrow.15	16	4720	94120	82930	100	27850	17960	37730	21920	12430	31410	95650	87320	100	1304	1088	1564	0.211	0.030	1461	39.580 \\
newrow.16	17	4750	94120	82930	100	29110	19100	39130	22220	12620	31830	95830	87840	100	1328	1104	1597	0.202	0.029	1395	40.620 \\
newrow.17	18	5480	94120	82930	100	30380	20240	40520	22540	12820	32250	96	88320	100	1352	1120	1632	0.194	0.028	1334	41.670 \\
newrow.18	19	5500	94120	82930	100	31650	21390	41900	22860	13020	32690	96150	88760	100	1377	1137	1668	0.186	0.027	1279	42.710 \\
newrow.19	20	5550	94120	82930	100	34180	23720	44640	23530	13450	33610	96430	89550	100	1430	1173	1744	0.172	0.025	1180	44.790 \\
newrow.20	21	5870	94120	82930	100	35440	24900	45990	23880	13670	34090	96550	89910	100	1458	1191	1784	0.166	0.024	1137	45.830 \\
newrow.21	22	6280	94120	82930	100	36710	26080	47340	24240	13900	34580	96670	90240	100	1487	1211	1827	0.160	0.023	1097	46.880 \\
newrow.22	23	6330	94120	82930	100	39240	28470	50010	25	14390	35610	96880	90850	100	1549	1251	1917	0.150	0.022	1023	48.960 \\
newrow.23	24	6360	94120	82930	100	40510	29680	51330	25400	14650	36150	96970	91120	100	1582	1273	1966	0.145	0.021	0.990	50 \\
newrow.24	25	7050	94120	82930	100	41770	30900	52650	25810	14910	36700	97060	91380	100	1616	1295	2017	0.141	0.021	0.960	51.040 \\
newrow.25	26	7070	94120	82930	100	44300	33350	55260	26670	15480	37860	97220	91850	100	1690	1343	2126	0.133	0.020	0.903	53.120 \\
newrow.26	27	7830	94120	82930	100	45570	34590	56550	27120	15770	38460	97300	92070	100	1729	1368	2185	0.129	0.019	0.877	54.170 \\
newrow.27	28	7840	94120	82930	100	48100	37080	59120	28070	16410	39740	97440	92480	100	1813	1422	2313	0.122	0.018	0.830	56.250 \\
newrow.28	29	7850	94120	82930	100	49370	38340	60390	28570	16740	40400	97500	92660	100	1859	1451	2382	0.119	0.018	0.808	57.290 \\
newrow.29	30	7870	94120	82930	100	50630	39610	61660	29090	17090	41090	97560	92840	100	1906	1480	2455	0.116	0.017	0.787	58.330 \\
newrow.30	31	7950	94120	82930	100	51900	40880	62920	29630	17450	41810	97620	93010	100	1957	1512	2533	0.113	0.017	0.768	59.380 \\
newrow.31	32	8410	94120	82930	100	53160	42160	64170	30190	17830	42550	97670	93170	100	2009	1544	2615	0.111	0.016	0.749	60.420 \\
newrow.32	33	8610	94120	82930	100	54430	43450	65410	30770	18220	43310	97730	93320	100	2065	1579	2702	0.108	0.016	0.731	61.460 \\
newrow.33	34	8620	94120	82930	100	55700	44740	66650	31370	18640	44110	97780	93470	100	2125	1615	2795	0.106	0.016	0.714	62.500 \\
newrow.34	35	8630	94120	82930	100	56960	46040	67880	32	19070	44930	97830	93610	100	2187	1653	2894	0.103	0.015	0.698	63.540 \\
newrow.35	36	8640	94120	82930	100	58230	47350	69100	32650	19520	45780	97870	93750	100	2253	1692	3000	0.101	0.015	0.682	64.580 \\
newrow.36	37	9	94120	82930	100	59490	48670	70320	33330	20	46670	97920	93880	100	2323	1734	3113	0.099	0.015	0.667	65.620 \\
newrow.37	38	9390	94120	82930	100	60760	49990	71530	34040	20500	47590	97960	94	100	2399	1779	3235	0.097	0.014	0.654	66.670 \\
newrow.38	39	9430	94120	82930	100	62030	51320	72730	34780	21020	48550	98	94120	100	2479	1826	3366	0.095	0.014	0.640	67.710 \\
newrow.39	40	9490	94120	82930	100	63290	52660	73920	35560	21570	49540	98040	94230	100	2564	1875	3506	0.093	0.014	0.627	68.750 \\
newrow.40	41	10050	94120	82930	100	64560	54010	75100	36360	22150	50580	98080	94340	100	2656	1928	3659	0.091	0.014	0.614	69.790 \\
newrow.41	42	10190	88240	72920	100	64560	54010	75100	34880	20640	49130	96230	91100	100	2490	1764	3514	0.182	0.049	0.677	68.750 \\
newrow.42	43	10200	88240	72920	100	65820	55360	76280	35710	21220	50210	96300	91260	100	2582	1816	3670	0.179	0.048	0.663	69.790 \\
newrow.43	44	10210	88240	72920	100	67090	56730	77450	36590	21840	51330	96360	91420	100	2681	1872	3841	0.175	0.047	0.650	70.830 \\
newrow.44	45	10220	88240	72920	100	69620	59480	79760	38460	23190	53730	96490	91710	100	2905	1994	4231	0.169	0.046	0.626	72.920 \\
newrow.45	46	10240	88240	72920	100	70890	60870	80900	39470	23930	55010	96550	91860	100	3031	2062	4457	0.166	0.045	0.615	73.960 \\
newrow.46	47	10250	88240	72920	100	72150	62270	82040	40540	24720	56360	96610	91990	100	3168	2134	4704	0.163	0.044	0.604	75 \\
newrow.47	48	10990	88240	72920	100	73420	63680	83160	41670	25560	57770	96670	92120	100	3320	2213	4980	0.160	0.043	0.593	76.040 \\
newrow.48	49	11780	88240	72920	100	74680	65100	84270	42860	26460	59250	96720	92250	100	3485	2298	5286	0.158	0.043	0.583	77.080 \\
newrow.49	50	11950	88240	72920	100	75950	66520	85370	44120	27430	60810	96770	92380	100	3669	2390	5632	0.155	0.042	0.572	78.120 \\
newrow.50	51	12570	88240	72920	100	77220	67970	86460	45450	28470	62440	96830	92500	100	3874	2491	6024	0.152	0.041	0.563	79.170 \\
newrow.51	52	12580	88240	72920	100	78480	69420	87540	46880	29590	64160	96880	92610	100	4100	2600	6466	0.150	0.040	0.554	80.210 \\
newrow.52	53	12840	88240	72920	100	79750	70880	88610	48390	30800	65980	96920	92720	100	4357	2721	6977	0.148	0.040	0.545	81.250 \\
newrow.53	54	13330	88240	72920	100	81010	72360	89660	50	32110	67890	96970	92830	100	4647	2854	7565	0.145	0.039	0.536	82.290 \\
newrow.54	55	13350	88240	72920	100	82280	73860	90700	51720	33540	69910	97010	92940	100	4980	3003	8258	0.143	0.039	0.527	83.330 \\
newrow.55	56	13370	88240	72920	100	86080	78440	93710	57690	38700	76680	97140	93240	100	6339	3567	11267	0.137	0.037	0.504	86.460 \\
newrow.56	57	13840	88240	72920	100	87340	80010	94670	60	40800	79200	97180	93330	100	6970	3807	12760	0.135	0.036	0.496	87.500 \\
newrow.57	58	14820	82350	64230	100	87340	80010	94670	58330	38610	78060	95830	91220	100	6505	3500	12087	0.202	0.072	0.566	86.460 \\
newrow.58	59	15340	82350	64230	100	88610	81600	95610	60870	40920	80810	95890	91340	100	7230	3762	13894	0.199	0.071	0.558	87.500 \\
newrow.59	60	15470	82350	64230	100	89870	83220	96530	63640	43540	83740	95950	91450	100	8129	4066	16253	0.196	0.070	0.550	88.540 \\
newrow.60	61	15890	82350	64230	100	91140	84870	97410	66670	46500	86830	96	91570	100	9295	4432	19494	0.194	0.069	0.542	89.580 \\
newrow.61	62	16450	82350	64230	100	92410	86560	98250	70	49920	90080	96050	91670	100	10850	4875	24148	0.191	0.068	0.534	90.620 \\
newrow.62	63	17240	82350	64230	100	93670	88300	99040	73680	53880	93480	96100	91780	100	13009	5415	31253	0.188	0.067	0.527	91.670 \\
newrow.63	64	17290	82350	64230	100	94940	90100	99770	77780	58570	96980	96150	91890	100	16275	6109	43360	0.186	0.066	0.520	92.710 \\
newrow.64	65	18090	76470	56310	96630	94940	90100	99770	76470	56310	96630	94940	90100	99770	15113	5612	40697	0.248	0.105	0.585	91.670 \\
newrow.65	66	19430	76470	56310	96630	96200	91990	100	81250	62130	100	95	90220	99780	20124	6431	62972	0.245	0.104	0.577	92.710 \\
newrow.66	67	21930	76470	56310	96630	97470	94	100	86670	69460	100	95060	90340	99780	30225	7502	121771	0.241	0.102	0.569	93.750 \\
newrow.67	68	21970	76470	56310	96630	98730	96270	100	92860	79370	100	95120	90460	99780	60213	8437	429734	0.238	0.101	0.562	94.790 \\
newrow.68	69	22080	70590	48930	92250	98730	96270	100	92310	77820	100	93980	88860	99090	55583	7739	399179	0.298	0.143	0.622	93.750 \\
newrow.69	70	24340	64710	41990	87420	98730	96270	100	91670	76030	100	92860	87350	98360	50953	7043	368633	0.357	0.188	0.681	92.710 \\
newrow.70	71	25	58820	35430	82220	98730	96270	100	90910	73920	100	91760	85920	97610	46315	6346	338045	0.417	0.236	0.737	91.670 \\
newrow.71	72	27470	52940	29210	76670	98730	96270	100	90	71410	100	90700	84560	96840	41685	5650	307527	0.477	0.288	0.790	90.620 \\
newrow.72	73	34800	52940	29210	76670	100	100	100	100	100	100	90800	84730	96880	Inf		Inf	0.471	0.284	0.779	91.670 \\
newrow.73	74	36240	47060	23330	70790	100	100	100	100	100	100	89770	83440	96100	Inf		Inf	0.529	0.338	0.829	90.620 \\
newrow.74	75	41580	41180	17780	64570	100	100	100	100	100	100	88760	82200	95330	Inf		Inf	0.588	0.395	0.876	89.580 \\
newrow.75	76	43010	35290	12580	58010	100	100	100	100	100	100	87780	81010	94540	Inf		Inf	0.647	0.456	0.919	88.540 \\
newrow.76	77	51650	29410	7750	51070	100	100	100	100	100	100	86810	79860	93760	Inf		Inf	0.706	0.519	0.959	87.500 \\
newrow.77	78	54840	23530	3370	43690	100	100	100	100	100	100	85870	78750	92990	Inf		Inf	0.765	0.588	0.995	86.460 \\
newrow.78	79	61710	17650	0	35770	100	100	100	100	100	100	84950	77680	92210	Inf		Inf	0.824	0.661	1026	85.420 \\
newrow.79	80	74560	11760	0	27080	100	100	100	100	100	100	84040	76640	91450	Inf		Inf	0.882	0.742	1050	84.380 \\
newrow.80	81	84	5880	0	17070	100	100	100	100	100	100	83160	75630	90680	Inf		Inf	0.941	0.836	1060	83.330 \\
\

## Sheet: P1(20)P3
Supplementary Table S4-H: P1(20)P3 – ROC curve of OTML for cutoff 20 muts/Mb by FO
Value P1 (Foundation One) ≥ 20 muts/Mb versus P3 (OTML)
ROC -Asymptotic Normal--
Obs Area Std. Err. [95% Conf. Interval]
------------------------------------------------------------
96 0.8801 0.0577 0.76702 0.99322
Optimal cutoff
Empirical cut-off point estimation
Method: Liu
Reference variable: P1FoundationOne_mas20 (0=neg, 1=pos)
Classification variable: P3Thermo
Empirical optimal cut-off point: 18.116328
Sensitivity at cut-off point: 0.76
Specificity at cut-off point: 0.94
Area under ROC curve at cut-off point: 0.85
	j	cut	sensitivity	lower 95% CI	upper 95% CI	Specificity	lower 95% CI	upper 95% CI	Positive predictive value	lower 95% CI	upper 95% CI	Negative predictive value	lower 95% CI	upper 95% CI	likelihood ratio positive	lower 95% CI	upper 95% CI	likelihood ratio negative	lower 95% CI	upper 95% CI	accuracy
newrow	1	0	100	100	100	0	0	0	17710	10070	25340				1	1	1				17.710 \\
newrow.1	2	1680	100	100	100	1270	0	3730	17890	10190	25600	100	100	100	1013	0.988	1039	0	0		18.750 \\
newrow.2	3	2520	100	100	100	2530	0	6	18090	10300	25870	100	100	100	1026	0.990	1063	0	0		19.790 \\
newrow.3	4	2540	100	100	100	3800	0	8010	18280	10420	26130	100	100	100	1040	0.995	1086	0	0		20.830 \\
newrow.4	5	2550	100	100	100	5060	0.230	9900	18480	10550	26410	100	100	100	1053	1001	1108	0	0		21.880 \\
newrow.5	6	3360	100	100	100	6330	0.960	11700	18680	10670	26690	100	100	100	1068	1008	1131	0	0		22.920 \\
newrow.6	7	3370	100	100	100	8860	2590	15130	19100	10930	27270	100	100	100	1097	1024	1175	0	0		25 \\
newrow.7	8	3380	100	100	100	11390	4390	18400	19540	11210	27870	100	100	100	1129	1043	1221	0	0		27.080 \\
newrow.8	9	4210	100	100	100	13920	6290	21560	20	11500	28500	100	100	100	1162	1063	1269	0	0		29.170 \\
newrow.9	10	4230	100	100	100	16460	8280	24630	20480	11800	29160	100	100	100	1197	1085	1320	0	0		31.250 \\
newrow.10	11	5040	100	100	100	17720	9300	26140	20730	11960	29510	100	100	100	1215	1097	1346	0	0		32.290 \\
newrow.11	12	5050	100	100	100	18990	10340	27640	20990	12120	29860	100	100	100	1234	1109	1373	0	0		33.330 \\
newrow.12	13	5060	100	100	100	20250	11390	29120	21250	12290	30210	100	100	100	1254	1122	1401	0	0		34.380 \\
newrow.13	14	5070	94120	82930	100	20250	11390	29120	20250	11390	29120	94120	82930	100	1180	1003	1389	0.290	0.041	2044	33.330 \\
newrow.14	15	5090	94120	82930	100	21520	12460	30580	20510	11550	29470	94440	83860	100	1199	1016	1415	0.273	0.039	1916	34.380 \\
newrow.15	16	5110	94120	82930	100	24050	14630	33480	21050	11890	30220	95	85450	100	1239	1044	1472	0.244	0.035	1704	36.460 \\
newrow.16	17	5870	94120	82930	100	25320	15730	34900	21330	12060	30600	95240	86130	100	1260	1058	1501	0.232	0.033	1614	37.500 \\
newrow.17	18	5880	94120	82930	100	26580	16840	36320	21620	12240	31	95450	86750	100	1282	1073	1532	0.221	0.032	1534	38.540 \\
newrow.18	19	5890	94120	82930	100	27850	17960	37730	21920	12430	31410	95650	87320	100	1304	1088	1564	0.211	0.030	1461	39.580 \\
newrow.19	20	5920	94120	82930	100	30380	20240	40520	22540	12820	32250	96	88320	100	1352	1120	1632	0.194	0.028	1334	41.670 \\
newrow.20	21	5980	94120	82930	100	31650	21390	41900	22860	13020	32690	96150	88760	100	1377	1137	1668	0.186	0.027	1279	42.710 \\
newrow.21	22	6720	94120	82930	100	32910	22550	43270	23190	13230	33150	96300	89170	100	1403	1155	1705	0.179	0.026	1228	43.750 \\
newrow.22	23	6730	94120	82930	100	34180	23720	44640	23530	13450	33610	96430	89550	100	1430	1173	1744	0.172	0.025	1180	44.790 \\
newrow.23	24	6740	94120	82930	100	36710	26080	47340	24240	13900	34580	96670	90240	100	1487	1211	1827	0.160	0.023	1097	46.880 \\
newrow.24	25	6760	94120	82930	100	37970	27270	48680	24620	14140	35090	96770	90550	100	1517	1230	1871	0.155	0.023	1059	47.920 \\
newrow.25	26	7560	94120	82930	100	39240	28470	50010	25	14390	35610	96880	90850	100	1549	1251	1917	0.150	0.022	1023	48.960 \\
newrow.26	27	7590	94120	82930	100	41770	30900	52650	25810	14910	36700	97060	91380	100	1616	1295	2017	0.141	0.021	0.960	51.040 \\
newrow.27	28	8360	94120	82930	100	43040	32120	53960	26230	15190	37270	97140	91620	100	1652	1319	2070	0.137	0.020	0.930	52.080 \\
newrow.28	29	8380	94120	82930	100	44300	33350	55260	26670	15480	37860	97220	91850	100	1690	1343	2126	0.133	0.020	0.903	53.120 \\
newrow.29	30	8390	88240	72920	100	44300	33350	55260	25420	14310	36530	94590	87310	100	1584	1219	2059	0.266	0.071	0.999	52.080 \\
newrow.30	31	8410	88240	72920	100	45570	34590	56550	25860	14590	37130	94740	87640	100	1621	1242	2115	0.258	0.069	0.970	53.120 \\
newrow.31	32	8430	88240	72920	100	46840	35830	57840	26320	14880	37750	94870	87950	100	1660	1267	2175	0.251	0.067	0.943	54.170 \\
newrow.32	33	8450	88240	72920	100	48100	37080	59120	26790	15190	38380	95	88250	100	1700	1292	2237	0.244	0.065	0.917	55.210 \\
newrow.33	34	9210	88240	72920	100	49370	38340	60390	27270	15500	39040	95120	88530	100	1743	1319	2302	0.238	0.064	0.892	56.250 \\
newrow.34	35	9240	88240	72920	100	50630	39610	61660	27780	15830	39720	95240	88800	100	1787	1347	2372	0.232	0.062	0.870	57.290 \\
newrow.35	36	9260	88240	72920	100	51900	40880	62920	28300	16170	40430	95350	89050	100	1834	1376	2445	0.227	0.061	0.848	58.330 \\
newrow.36	37	9280	88240	72920	100	54430	43450	65410	29410	16910	41920	95560	89530	100	1936	1439	2606	0.216	0.058	0.807	60.420 \\
newrow.37	38	9300	88240	72920	100	55700	44740	66650	30	17300	42700	95650	89760	100	1992	1473	2694	0.211	0.057	0.788	61.460 \\
newrow.38	39	9310	88240	72920	100	56960	46040	67880	30610	17710	43520	95740	89970	100	2050	1508	2788	0.206	0.055	0.770	62.500 \\
newrow.39	40	10080	88240	72920	100	58230	47350	69100	31250	18140	44360	95830	90180	100	2112	1545	2889	0.202	0.054	0.753	63.540 \\
newrow.40	41	10090	88240	72920	100	59490	48670	70320	31910	18590	45240	95920	90380	100	2178	1584	2996	0.198	0.053	0.736	64.580 \\
newrow.41	42	10150	88240	72920	100	60760	49990	71530	32610	19060	46160	96	90570	100	2249	1625	3111	0.194	0.052	0.720	65.620 \\
newrow.42	43	10160	88240	72920	100	62030	51320	72730	33330	19560	47110	96080	90750	100	2324	1669	3236	0.190	0.051	0.705	66.670 \\
newrow.43	44	10200	88240	72920	100	63290	52660	73920	34090	20080	48100	96150	90930	100	2404	1715	3369	0.186	0.050	0.690	67.710 \\
newrow.44	45	10900	88240	72920	100	64560	54010	75100	34880	20640	49130	96230	91100	100	2490	1764	3514	0.182	0.049	0.677	68.750 \\
newrow.45	46	11730	88240	72920	100	65820	55360	76280	35710	21220	50210	96300	91260	100	2582	1816	3670	0.179	0.048	0.663	69.790 \\
newrow.46	47	11770	82350	64230	100	65820	55360	76280	34150	19630	48660	94550	88540	100	2409	1653	3512	0.268	0.095	0.758	68.750 \\
newrow.47	48	11820	82350	64230	100	67090	56730	77450	35	20220	49780	94640	88750	100	2502	1704	3674	0.263	0.093	0.743	69.790 \\
newrow.48	49	12600	82350	64230	100	68350	58100	78610	35900	20840	50950	94740	88940	100	2602	1759	3850	0.258	0.092	0.729	70.830 \\
newrow.49	50	12760	82350	64230	100	69620	59480	79760	36840	21510	52180	94830	89130	100	2711	1817	4043	0.254	0.090	0.715	71.880 \\
newrow.50	51	13220	82350	64230	100	70890	60870	80900	37840	22210	53460	94920	89310	100	2829	1880	4256	0.249	0.088	0.702	72.920 \\
newrow.51	52	13430	82350	64230	100	72150	62270	82040	38890	22960	54810	95	89490	100	2957	1947	4490	0.245	0.087	0.689	73.960 \\
newrow.52	53	13450	82350	64230	100	73420	63680	83160	40	23770	56230	95080	89660	100	3098	2021	4751	0.240	0.085	0.677	75 \\
newrow.53	54	13490	82350	64230	100	75950	66520	85370	42420	25560	59290	95240	89980	100	3424	2184	5367	0.232	0.083	0.654	77.080 \\
newrow.54	55	13520	82350	64230	100	77220	67970	86460	43750	26560	60940	95310	90130	100	3615	2278	5737	0.229	0.081	0.643	78.120 \\
newrow.55	56	13530	82350	64230	100	78480	69420	87540	45160	27640	62680	95380	90280	100	3827	2379	6154	0.225	0.080	0.632	79.170 \\
newrow.56	57	14250	76470	56310	96630	78480	69420	87540	43330	25600	61070	93940	88180	99700	3553	2162	5840	0.300	0.126	0.712	78.120 \\
newrow.57	58	14290	76470	56310	96630	79750	70880	88610	44830	26730	62930	94030	88360	99700	3776	2266	6294	0.295	0.124	0.700	79.170 \\
newrow.58	59	14340	76470	56310	96630	81010	72360	89660	46430	27960	64900	94120	88530	99710	4027	2379	6816	0.290	0.122	0.689	80.210 \\
newrow.59	60	15100	76470	56310	96630	82280	73860	90700	48150	29300	66990	94200	88690	99720	4316	2506	7431	0.286	0.121	0.678	81.250 \\
newrow.60	61	15440	76470	56310	96630	83540	75370	91720	50	30780	69220	94290	88850	99720	4646	2647	8154	0.282	0.119	0.667	82.290 \\
newrow.61	62	15970	76470	56310	96630	84810	76900	92720	52	32420	71580	94370	89	99730	5034	2807	9027	0.277	0.117	0.657	83.330 \\
newrow.62	63	16840	76470	56310	96630	87340	80010	94670	56520	36260	76780	94520	89300	99740	6040	3196	11415	0.269	0.114	0.637	85.420 \\
newrow.63	64	16870	76470	56310	96630	88610	81600	95610	59090	38550	79640	94590	89440	99750	6714	3438	13109	0.266	0.112	0.628	86.460 \\
newrow.64	65	16960	76470	56310	96630	89870	83220	96530	61900	41130	82670	94670	89580	99750	7549	3719	15322	0.262	0.111	0.619	87.500 \\
newrow.65	66	17670	76470	56310	96630	91140	84870	97410	65	44100	85900	94740	89720	99760	8631	4058	18359	0.258	0.109	0.610	88.540 \\
newrow.66	67	17760	76470	56310	96630	92410	86560	98250	68420	47520	89320	94810	89850	99760	10075	4468	22719	0.255	0.108	0.601	89.580 \\
newrow.67	68	18480	76470	56310	96630	93670	88300	99040	72220	51530	92910	94870	89980	99770	12081	4969	29370	0.251	0.106	0.593	90.620 \\
newrow.68	69	19340	70590	48930	92250	93670	88300	99040	70590	48930	92250	93670	88300	99040	11152	4524	27487	0.314	0.150	0.657	89.580 \\
newrow.69	70	20280	70590	48930	92250	94940	90100	99770	75	53780	96220	93750	88450	99050	13951	5117	38035	0.310	0.148	0.648	90.620 \\
newrow.70	71	20300	64710	41990	87420	94940	90100	99770	73330	50950	95710	92590	86890	98300	12789	4624	35372	0.372	0.195	0.709	89.580 \\
newrow.71	72	21300	64710	41990	87420	96200	91990	100	78570	57080	100	92680	87050	98320	17029	5316	54544	0.367	0.192	0.699	90.620 \\
newrow.72	73	22670	64710	41990	87420	97470	94	100	84620	65	100	92770	87200	98340	25577	6228	105036	0.362	0.190	0.690	91.670 \\
newrow.73	74	22700	64710	41990	87420	98730	96270	100	91670	76030	100	92860	87350	98360	50953	7043	368633	0.357	0.188	0.681	92.710 \\
newrow.74	75	23470	58820	35430	82220	98730	96270	100	90910	73920	100	91760	85920	97610	46315	6346	338045	0.417	0.236	0.737	91.670 \\
newrow.75	76	23540	58820	35430	82220	100	100	100	100	100	100	91860	86080	97640	Inf		Inf	0.412	0.233	0.727	92.710 \\
newrow.76	77	27750	52940	29210	76670	100	100	100	100	100	100	90800	84730	96880	Inf		Inf	0.471	0.284	0.779	91.670 \\
newrow.77	78	27990	47060	23330	70790	100	100	100	100	100	100	89770	83440	96100	Inf		Inf	0.529	0.338	0.829	90.620 \\
newrow.78	79	32970	41180	17780	64570	100	100	100	100	100	100	88760	82200	95330	Inf		Inf	0.588	0.395	0.876	89.580 \\
newrow.79	80	34420	35290	12580	58010	100	100	100	100	100	100	87780	81010	94540	Inf		Inf	0.647	0.456	0.919	88.540 \\
newrow.80	81	40340	29410	7750	51070	100	100	100	100	100	100	86810	79860	93760	Inf		Inf	0.706	0.519	0.959	87.500 \\
newrow.81	82	45180	23530	3370	43690	100	100	100	100	100	100	85870	78750	92990	Inf		Inf	0.765	0.588	0.995	86.460 \\
newrow.82	83	50450	17650	0	35770	100	100	100	100	100	100	84950	77680	92210	Inf		Inf	0.824	0.661	1026	85.420 \\
newrow.83	84	55500	11760	0	27080	100	100	100	100	100	100	84040	76640	91450	Inf		Inf	0.882	0.742	1050	84.380 \\
newrow.84	85	59790	5880	0	17070	100	100	100	100	100	100	83160	75630	90680	Inf		Inf	0.941	0.836	1060	83.330 \\
\

## Sheet: ROC comparison
Supplementary Table S4-I: Differences among ROC curves
Differences among ROC curves
Values P1 (Foundation One) ≥ 10 muts/Mb
ROC -Asymptotic Normal--
Obs Area Std. Err. [95% Conf. Interval]
-------------------------------------------------------------------------
P2Illumina 96 0.9014 0.0349 0.83305 0.96982
P3Thermo 96 0.8949 0.0313 0.83363 0.95621
-------------------------------------------------------------------------
Ho: area(P2Illumina) = area(P3Thermo)
chi2(1) = 0.04 Prob>chi2 = 0.8398
Values P1 (Foundation One) ≥ 13 muts/Mb
ROC -Asymptotic Normal--
Obs Area Std. Err. [95% Conf. Interval]
-------------------------------------------------------------------------
P2Illumina 96 0.8714 0.0473 0.77883 0.96405
P3Thermo 96 0.8648 0.0400 0.78634 0.94326
-------------------------------------------------------------------------
Ho: area(P2Illumina) = area(P3Thermo)
chi2(1) = 0.03 Prob>chi2 = 0.8625
Values P1 (Foundation One) ≥ 16 muts/Mb
ROC -Asymptotic Normal--
Obs Area Std. Err. [95% Conf. Interval]
-------------------------------------------------------------------------
P2Illumina 96 0.9082 0.0403 0.82928 0.98714
P3Thermo 96 0.8728 0.0430 0.78851 0.95706
-------------------------------------------------------------------------
Ho: area(P2Illumina) = area(P3Thermo)
chi2(1) = 1.45 Prob>chi2 = 0.2284
Values P1 (Foundation One) ≥ 20 muts/Mb
ROC -Asymptotic Normal--
Obs Area Std. Err. [95% Conf. Interval]
-------------------------------------------------------------------------
P2Illumina 96 0.9092 0.0589 0.79364 1.00000
P3Thermo 96 0.8801 0.0577 0.76702 0.99322
-------------------------------------------------------------------------
Ho: area(P2Illumina) = area(P3Thermo)
chi2(1) = 1.44 Prob>chi2 = 0.2308

## Sheet: Empirical cut-off values
Supplementary Table S4-J: Empiric optimal cut-offs for TSO500 and OTML equivalent to cut-off values of 10, 13, 16 and 20 muts/Mb by FO
Reference variable	FO ≥ 10 muts/Mb		FO ≥ 13 muts/Mb		FO ≥ 16 muts/Mb		FO ≥ 20 muts/Mb
Classification variable	TSO500	OTML	TSO500	OTML	TSO500	OTML	TSO500	OTML
Area under ROC curve	0.9014	0.8949	0.8714	0.8648	0.9082	0.8728	0.9092	0.8801
Std Dev	0.0349	0.0313	0.0473	0.04	0.0403	0.043	0.0589	0.0577
95% confidence interval	0.83305 0.96298	0.83363 0.95621	0.77883 0.96405	0.78634 0.94326	0.82928 0.98714	0.78851 0.95706	0.79364 1.00000	0.76702 0.99322
	0.96298
Empirical adjusted cut-off point	10.23	9.306	10.622	13.326	10.622	13.506	17.261	18.116
Sensitivity at the empirical adjusted cut-off point	0.76	0.84	0.8235	0.79	0.89	0.78	0.8235	0.7647
Specificity at the empirical adjusted cut-off point	0.98	0.83	0.871	0.85	0.83	0.84	0.9494	0.9367
Positive Predictive Value at that cut-off point	0.9737	0.8367	0.7778	0.75	0.6667	0.6562	0.7778	0.7222
Negative Predictive Value at cut-off point	0.7931	0.8298	0.9	0.8833	0.95	0.9062	0.9615	0.9487
Area under ROC curve at cut-off point	0.87	0.83	0.85	0.82	0.86	0.81	0.89	0.85

[truncated: 1 more sheets: Adjusted cut-offs sensit>90%]
