# Supplementary material for: Tumor mutational burden assessment in non-small-cell lung cancer samples: results from the TMB2 harmonization project comparing three NGS panels
Source: J Immunother Cancer. 2021 May 7;9(5):e001904. doi: 10.1136/jitc-2020-001904 (PMC8108670; doi:10.1136/jitc-2020-001904)
Supplement: Supplementary data [file jitc-2020-001904supp006.xlsx]

## Sheet: N = 96 common samples
SUPPLEMENTARY TABLE S5. TMB VALUE DISTRIBUTION ACCORDING TO THE LEVEL OF INFILTRATION OF SEVERAL IMMUNE CELL SUBPOPULATIONS EVALUATED BY IMMUNOHISTOCHEMISTRY.
#ID	TMB FO	Total TMB TSO500	Total TMB OTML	CD8 Score	CD4 Score	CD68 Score	CD20 Score
P17011-001-02	6	8.614	9.29803	0	0	1	0
P17011-001-03	18	8.41	13.434	1	0	1	1
P17011-001-05	33	24.996	34.4199	2	2	2	2
P17011-001-09	1	3.223	3.38039	2	2	1	1
P17011-001-10	10	16.451	20.2958	1	0	1	0
P17011-001-103	13	12.583	14.3438	1	0	1	2
P17011-001-110	56	61.712	45.1822	1	0	2	0
P17011-001-111	6	4.752	8.44937	0	0	1	0
P17011-001-115	5	3.929	5.91716	1	0	2	1
P17011-001-116	2	2.372	4.23151	1	0	2	1
P17011-001-117	3	3.15	2.5462	1	1	2	0
P17011-001-118	8	9.487	12.7624	1	0	1	0
P17011-001-121	4	6.334	5.08546	1	1	1	1
P17011-001-123	11	13.334	11.7661	0	0	1	0
P17011-001-128	18	15.47	17.7557	2	0	2	1
P17011-001-129	11	10.244	16.9573	0	0	1	0
P17011-001-13	5	4.711	6.7161	1	0	1	1
P17011-001-130	32	36.238	20.2766	1	1	2	1
P17011-001-132	11	15.338	11.8209	0	0	2	0
P17011-001-133	8	7.946	9.26008	2	1	2	2
P17011-001-14	15	19.426	14.2524	1	0	1	0
P17011-001-140	16	10.995	5.98097	0	0	1	0
P17011-001-141	0	3.142	0	1	1	2	2
P17011-001-142	46	43.011	27.9886	1	1	1	1
P17011-001-153	2	2.354	3.35639	0	1	2	1
P17011-001-154	31	24.345	23.536	1	0	2	1
P17011-001-155	71	74.559	55.4958	1	0	1	0
P17011-001-161	1	2.358	3.37967	1	1	2	2
P17011-001-163	13	27.466	13.4917	1	0	1	1
P17011-001-164	1	1.573	6.74136	0	0	1	0
P17011-001-165	9	7.071	16.8387	1	0	2	0
P17011-001-167	16	13.365	21.3006	1	0	1	0
P17011-001-168	5	3.923	5.10514	1	1	1	1
P17011-001-17	4	0.784	2.54487	0	0	0	0
P17011-001-172	8	0.786	6.72667	1	0	1	1
P17011-001-179	10	8.636	13.2184	1	0	1	1
P17011-001-18	9	6.282	16.8747	1	0	1	0
P17011-001-180	3	1.571	5.88899	2	1	2	2
P17011-001-182	11	5.484	7.55857	1	0	2	1
P17011-001-185	5	6.277	4.20525	1	1	2	1
P17011-001-186	44	51.646	40.3391	1	0	2	1
P17011-001-187	74	83.999	59.7904	1	0	1	1
P17011-001-188	6	4.719	10.1599	2	2	1	2
P17011-001-198	18	17.236	14.2874	2	1	2	1
P17011-001-21	2	1.621	10.1492	1	0	0	1
P17011-001-23	5	7.831	4.20799	2	0	2	1
P17011-001-25	18	12.839	10.9002	1	1	2	1
P17011-001-26	5	5.867	6.73237	1	0	1	0
P17011-001-28	6	3.927	6.76332	2	1	1	0
P17011-001-29	22	10.053	8.38335	2	1	1	1
P17011-001-30	13	9.434	9.24089	2	1	2	1
P17011-001-31	10	13.348	19.3441	1	0	1	0
P17011-001-32	0	5.496	9.21125	1	0	1	0
P17011-001-34	11	10.249	15.4365	1	0	2	0
P17011-001-35	39	54.843	50.4505	1	0	2	0
P17011-001-40	5	10.205	8.41222	1	0	1	0
P17011-001-41	11	10.195	10.1951	1	0	1	1
P17011-001-42	9	10.189	8.39228	1	0	1	0
P17011-001-44	6	5.498	3.36993	1	0	1	1
P17011-001-46	10	14.824	10.0763	2	0	1	2
P17011-001-47	5	7.052	3.3705	1	1	1	1
P17011-001-48	4	3.861	8.42625	1	0	1	1
P17011-001-49	6	8.628	7.59262	0	0	1	0
P17011-001-52	9	13.349	12.5956	0	0	1	0
P17011-001-53	2	4.713	5.04748	1	1	1	0
P17011-001-54	4	7.866	5.87446	1	1	2	1
P17011-001-55	15	3.136	23.4684	1	0	1	0
P17011-001-57	11	12.571	10.0853	2	1	1	2
P17011-001-58	8	10.217	5.04065	1	0	1	1
P17011-001-59	8	9.388	9.25785	1	1	1	1
P17011-001-60	4	6.357	2.52259	2	0	0	1
P17011-001-61	21	22.084	18.4769	2	0	2	2
P17011-001-62	8	7.843	13.4519	1	1	2	1
P17011-001-64	24	13.842	11.7319	1	0	2	2
P17011-001-66	14	11.777	13.4453	0	0	1	0
P17011-001-67	5	2.352	3.36185	1	0	2	1
P17011-001-68	10	7.827	15.9728	0	0	1	0
P17011-001-70	10	13.354	9.27551	0	0	1	0
P17011-001-74	11	7.847	7.558	1	1	1	1
P17011-001-75	32	34.795	27.7502	1	0	2	2
P17011-001-78	25	1.567	5.05559	1	0	1	1
P17011-001-79	43	41.578	32.9669	1	0	1	1
P17011-001-81	6	3.9191	1.6801	1	0	1	1
P17011-001-82	22	21.97	22.6997	2	1	2	1
P17011-001-83	18	15.892	17.6735	1	0	1	1
P17011-001-85	25	17.286	13.5327	1	0	1	1
P17011-001-86	18	18.085	15.9707	1	0	1	2
P17011-001-87	4	7.053	5.89491	1	1	1	1
P17011-001-89	13	1.566	5.87709	1	0	1	1
P17011-001-90	6	10.213	15.1048	1	1	1	2
P17011-001-91	11	9.002	9.31414	1	1	1	2
P17011-001-92	7	5.553	5.0887	1	0	0	1
P17011-001-94	17	11.947	13.5209	1	1	2	2
P17011-001-96	2	1.584	5.07193	1	1	1	1
P17011-001-97	9	8.621	8.36093	1	0	1	1
P17011-001-98	16	21.929	22.6715	1	0	1	1
Note
Score	Level of infiltration
0	<1%
1	1-10%
2	>10%
