# Supplementary material for: Tumor mutational burden assessment in non-small-cell lung cancer samples: results from the TMB2 harmonization project comparing three NGS panels
Source: J Immunother Cancer. 2021 May 7;9(5):e001904. doi: 10.1136/jitc-2020-001904 (PMC8108670; doi:10.1136/jitc-2020-001904)
Supplement: Supplementary data [file jitc-2020-001904supp008.xlsx]

## Sheet: Sheet1
Supplementary Table S7. Characteristics of the NGS panels used in the TMB2 Harmonization Study. Technological comparison among TruSight Oncology 500 (TSO500), Oncomine Tumor Mutation Load (OTML) and Foundation One (FO)
Next Generation Sequencing Panel	TruSight Oncology 500 (TSO500)	Oncomine Tumour Mutation Load (OTML)	Foundation One / Foundation 1 CDx (F1CDx)
Developer	Illumina Inc	Thermo Fisher Scientific	Foundation One Medicine / Roche
Prior steps to library generation and sequencing	DNA shearing	Treatment with Uracyl-DNA Glycosylase (UDG)	DNA shearing
Library preparation	Technology: Hybrid capture Performed in-house Not automated	Technology: Amplicon based Performed in-house Automated	Technology: Hybrid capture Performed through an external service Not automated
Sequencing technology	SBS, CRT, optical sensing	SBS, SNA, ion sensing	SBS, CRT, optical sensing
Input material (from FFPE)	40-120 ng DNA	20 ng DNA	50-200 ng DNA
Number of genes	523	409	324
Horizontal Coverage	1,94 Mb*	1,65 Mb**	0,8 Mb
UMIs	Yes	No	Yes
Recommended median depth	From ≥ 150x (minimun required) to 800-900X	500X	500X > 99% of exons with > 100X
Instrument required	NextSeq550	Ion Torrent S5	HiSeq 4000
Method to exclude artifacts (including FFPE deaminations)	PCR duplicates and oxidation/sequencing artefacts elimination with dual non-random UMIs Background noise suppresion algorithm Nucleotide error rate correction algorithm	Uracil DNA Glycosylase (UDG) treatment before amplicon library generation Deamination score cutoff (user defined) Somatic variants in homopolymer stretches longer than 4 bp were excluded.	MAF ≥ 10% for indels in homopolymer regions PCR duplicate removal witch Picard 1.47 and SAMtools 0.1.12a Base substitution reads with mapping quality <25 or base calling quality ≤2 are discarded SNP profile algorithm to eliminate cross-contamination
Criteria for TMB calculation	Germline variants are filtered with databases (GnomADexome, GnomAD genoma, 1000 Genomes) and a proximity filter. Variants with an AF > 90% are considered as germline. Driver variants are excluded. Multiple nucleotide variants are excluded. Variants with a count >50 in COSMIC are excluded. Quantification of SNVs and indels in exonic regions for TMB calculation. Variants with an AF ≥ 5%. Variants w…	Germline variants are filtered with databases (1000 Genome Project, NHLBI GO Exome Sequencing Project (ESP) , UCSC Common SNP, ExAC) Driver variants are excluded. Multiple nucleotide variants are excluded. Quantification of SNVs and indels in exonic regions for TMB calculation. Variants with an AF ≥ 5%. If deamination score ≥ 20, the AF is iscreased to ≥ 10% (user defined). Variants with depth co…	Germline variants are filtered with databases (dbSNP, ExAC) and the SGZ algorithm. Known and likely driver variants are excluded. Quantification of SNVs and indels for TMB calculation. Variants with an AF ≥ 5% (1% at hotspots). Indels filtering: Neighboring bases mismatches < 25%, average neighboring base quality > 25, average number of supporting read mismatches ≤ 2. MAF ≥ 5 % (3% at hotspots).
TMB report	TMB total + TMB non synonymous	TMB non synonymous	TMB total
Other results	SNVs, CNAs, indels, fusions & splice variants, MSI	SNVs, indels	SNVs, CNAs, indels, gene rearrangements, MSI
Legend:
PCR: Polymerase Chain Reaction
FFPE: Formalin-Fixed and Paraffin-Embedded
MB: megabases
NA: Not available
TMB: Tumor Mutational Burden
SNV: Single Nucleotide Variation
CNA: Copy Number Alteration
Indels: Insertions and deletions
MSI: Microsatellite Instability
SBS: sequencing by synthesis
CRT: cyclic reversible termination
SNA: single-nucleotyde addition
MAF: Minor Allele Frequency
AF: Allele Frequency
dbSNP: Single Nucleotide Polymorphism database
ExAC: Exome Aggregation Consortium
SGZ: Somatic-Germline/Zygosity
Proximity filter: a binomial distribution is calculated based on coverage and AF. If at least 5 variants are found in the same chromosome in a range of 2 times the Standard Deviation of AF, and at least 95% of those variants are germline according to the databases filter, the variant is considered as probably germline.
Background noise suppresion algorithm: it is based on 60 FFPE sequenced samples, with known genome, utilized to determine the background noise in every position of the panel. A binomial model is used to calculate a p value (that later becomes a Q score known as AQ) for each variant. A higher p value correlates with a higher background noise. Variant calling is performed at the cutoff of AQ=60.
Nucleotide error rate correction algorithm: as deaminations and other artefacts affect samples differently, a score is calculated for every sample based on the reads of variants with an AF <5%. For those reads, an error rate for every type of variant is calculated. A Q score is determined based on the likelihood ratio (LQ), which considers the probability of the variant being an artefact (based o…
*1.94 Mb including non-coding regions / 1.2-1.3 Mb including only coding regions
**1.65 Mb including non-coding regions / 1.2 Mb including only coding regions
