# Supplementary material for: Tumor mutational burden assessment in non-small-cell lung cancer samples: results from the TMB2 harmonization project comparing three NGS panels
Source: J Immunother Cancer. 2021 May 7;9(5):e001904. doi: 10.1136/jitc-2020-001904 (PMC8108670; doi:10.1136/jitc-2020-001904)
Supplement: Supplementary data [file jitc-2020-001904supp009.xlsx]

## Sheet: TSO500 N=104
SUPPLEMENTARY TABLE S8. QUALITY CONTROL AND INPUT PARAMETERS OF LIBRARY GENERATION WITH EACH OF THE NGS METHODS USED FOR THE TMB2 HARMONIZATION STUDY AND INTER-INSTITUTION REPRODUCIBILITY ASSAYS.
Supplementary Table S8-A. Quality control parameters and library generation data of TSO500 (N=104)
#ID	Stock concentration (ng/µl)	Amplification cycles compared to quality control	DNA input (ng)	Sheared fragment size (bp)	Library concentration prior to normalization (ng/µl)	Coding region size (Megabases)	Usable MSI Sites	Contamination score	Chromosomal imbalance	Median insert size (bp)	Median Exon coverage	Percentage Exon 50X	Total PF Reads	Mean family size	Median target coverage	Percentage of chimeric reads	Percentage Exon 100X	Percentage of read enrichment	Percentage of usable UMI reads	Mean target coverage	Percentage of aligned reads	Percentage of contamination	Percentage of PF UQ reads	Percentage of target 0,4X mean	Percentage of target 100X	Percentage of target 250X
P17011-001-09	7.62	3.53333	40-60	90-250	13.4	1,22-1,27	78	1038	1000	80	126	97.6	108560000	12.4	124.0	2.6	77.9	86.9	99.9	127.5	97.4	0.0	100.0	96.1	74.6	2.1
P17011-001-05	42.5	1.61857	40-60	90-250	9.93	1,22-1,27	14	1470	0.990	84	77	84.0	102493114	18.8	71.0	3.5	31.1	86.4	99.9	82.4	97.2	0.1	100.0	94.1	26.7	0.8
P17011-001-21	21.3	3.25	40-60	90-250	13.4	1,22-1,27	51	825	1000	88	118	97.2	103788170	13.9	114.0	2.4	71.2	86.8	99.9	116.0	96.5	0.0	100.0	96.0	66.2	1.0
P17011-001-22	19.7	4.69965	40-60	90-250	9.21	1,22-1,27	42	1048	0.999	77	72	82.1	101805684	18.6	72.0	2.7	16.5	85.7	99.9	75.5	97.0	0.1	100.0	94.4	18.1	0.2
P17011-001-25	56.5	1.24765	40-60	90-250	12	1,22-1,27	36	1370	1000	89	128	97.9	100314830	11.2	118.0	1.7	69.9	85.5	99.9	137.1	95.9	0.0	100.0	94.7	64.1	6.9
P17011-001-29	42.1	1.85464	40-60	90-250	12	1,22-1,27	13	608	1000	87	98	93.7	104753532	15.8	92.0	3.7	48.8	86.7	99.9	102.8	96.5	0.0	100.0	93.9	42.7	1.0
P17011-001-41	27.1	1.7172	40-60	90-250	18.6	1,22-1,27	112	370	1000	98	318	99.3	108679864	5.6	309.0	1.1	98.5	86.4	99.9	328.3	95.8	0.0	100.0	95.5	97.0	71.4
P17011-001-44	52	0.927442	40-60	90-250	17.5	1,22-1,27	97	765	1000	95	220	99.1	107584854	7.3	205.0	4.1	95.8	82.7	99.9	236.2	95.6	0.0	100.0	94.7	94.0	37.3
P17011-001-45	53	0.809096	40-60	90-250	15.6	1,22-1,27	87	615	1000	103	181	98.6	101109916	9.4	163.0	3.6	88.3	86.6	99.9	189.1	96.3	0.0	100.0	93.1	84.6	26.2
P17011-001-46	39.3	1.57959	40-60	90-250	12.3	1,22-1,27	6	545	1000	91	67	78.0	107833720	23.7	64.0	6.2	20.3	85.9	99.9	73.3	96.3	0.0	100.0	91.7	17.1	0.4
P17011-001-47	74	1.32599	40-60	90-250	19.3	1,22-1,27	108	738	1000	96	263	99.4	113725634	6.7	253.0	2.7	98.6	84.8	99.9	279.7	97.1	0.0	100.0	95.6	96.4	51.7
P17011-001-48	286	1.55848	40-60	90-250	11.1	1,22-1,27	2	902	0.953	94	63	70.5	95280450	22.6	60.0	3.0	18.7	84.9	99.9	68.0	96.5	0.1	100.0	91.4	15.7	0.3
P17011-001-54	91	1.28974	40-60	90-250	15	1,22-1,27	82	860	1000	95	173	99.0	103754774	9.2	166.0	3.6	91.6	83.8	99.9	181.7	96.6	0.0	100.0	95.3	88.6	15.3
P17011-001-57	99.2	1.44587	40-60	90-250	18.6	1,22-1,27	78	596	1000	96	168	99.1	108199708	9.6	159.0	2.3	92.0	85.4	99.9	186.6	97.1	0.0	100.0	95.0	88.5	17.3
P17011-001-180	45.1	3.03176	40-60	90-250	18.7	1,22-1,27	102	793	1000	83	208	99.1	103865646	7.7	203.0	2.1	97.2	85.9	99.9	198.8	96.4	0.0	100.0	96.6	95.0	15.5
P17011-001-60	35.9	1.84243	40-60	90-250	16.6	1,22-1,27	77	531	1000	97	145	98.6	105893414	12.1	139.0	2.0	86.5	87.0	99.9	147.6	97.3	0.0	100.0	95.9	82.9	6.9
P17011-001-61	185	1.23374	40-60	90-250	15.2	1,22-1,27	86	1260	1000	90	160	98.8	99254480	8.7	152.0	3.2	87.1	83.2	99.9	174.0	96.6	0.0	100.0	95.0	84.2	15.4
P17011-001-182	43	1.44991	40-60	90-250	21.9	1,22-1,27	107	1130	1000	92	237	99.4	116145874	7.6	228.0	2.2	97.7	85.3	99.9	248.2	97.3	0.0	100.0	95.8	95.8	39.2
P17011-001-64	49.3	2.16247	40-60	90-250	15.4	1,22-1,27	43	561	1000	92	115	96.2	105021180	14.3	109.0	2.9	66.3	88.0	99.9	120.9	97.0	0.0	100.0	93.7	59.9	5.3
P17011-001-198	45.3	2.22884	40-60	90-250	22.2	1,22-1,27	109	993	1000	84	271	99.4	115137860	6.6	263.0	3.6	98.3	84.6	99.9	264.4	97.1	0.0	100.0	96.1	96.5	57.9
P17011-001-03	53.3	1.91185	40-60	90-250	13.8	1,22-1,27	41	2357	0.807	91	110	94.8	96869466	13.3	105.0	2.3	61.0	85.4	99.9	113.0	96.0	0.1	100.0	93.6	55.7	2.3
P17011-001-26	46.9	2.10043	40-60	90-250	12	1,22-1,27	1	433	1000	84	71	83.2	109430992	24.2	68.0	2.8	11.7	88.0	99.9	68.8	96.7	0.0	100.0	95.2	9.7	0.0
P17011-001-53	41.3	1.46885	40-60	90-250	18.8	1,22-1,27	97	895	1000	94	205	99.1	99055508	7.7	201.0	4.0	96.1	82.7	99.9	203.4	95.3	0.0	100.0	96.4	94.3	17.5
P17011-001-67	75.5	0.724204	40-60	90-250	20.3	1,22-1,27	94	2760	0.249	98	213	99.3	93716744	6.8	209.0	2.2	97.9	84.8	99.9	230.8	96.8	0.0	100.0	96.4	95.9	28.3
P17011-001-72	41.8	2.19879	40-60	90-250	9.94	1,22-1,27	1	398	1000	87	53	58.2	99815000	30.5	50.0	4.3	2.7	87.7	99.9	51.2	96.6	0.0	100.0	93.9	2.2	0.0
P17011-001-75	31.8	3.02	40-60	90-250	18.3	1,22-1,27	78	963	1000	86	158	98.8	109066070	11.0	155.0	2.9	89.9	87.7	99.9	156.1	97.4	0.0	100.0	96.0	87.2	3.2
P17011-001-185	49.3	1.70672	40-60	90-250	19.6	1,22-1,27	96	886	1000	95	206	99.2	113325640	8.8	197.0	2.9	96.2	85.2	99.9	208.5	94.5	0.0	100.0	95.7	93.6	26.1
P17011-001-79	31.4	2.48	40-60	90-250	16.9	1,22-1,27	93	536	1000	95	240	99.3	94840112	6.7	234.0	2.5	97.7	85.6	99.9	232.1	96.4	0.0	100.0	96.3	95.8	40.1
P17011-001-81	36.7	2.62355	40-60	90-250	17.6	1,22-1,27	96	893	1000	90	273	99.3	99933498	6.1	266.0	2.8	98.1	85.6	99.9	260.0	96.6	0.0	100.0	95.8	96.1	59.5
P17011-001-82	43.8	2.68428	40-60	90-250	19.1	1,22-1,27	93	779	1000	88	225	99.2	106076250	7.7	220.0	2.6	97.5	86.0	99.9	216.6	97.3	0.0	100.0	96.6	95.6	28.5
P17011-001-186	20.9	3.23829	40-60	90-250	22.9	1,22-1,27	116	2808	0.330	92	380	99.4	115554044	4.7	369.0	1.5	99.1	84.2	99.9	390.2	97.3	0.0	100.0	95.9	97.9	86.2
P17011-001-83	40.7	2.70566	40-60	90-250	16.2	1,22-1,27	88	912	1000	88	157	98.1	100440130	9.8	156.0	2.4	89.1	85.6	99.9	157.5	97.0	0.0	100.0	95.6	87.7	3.6
P17011-001-86	77	1.87376	40-60	90-250	18	1,22-1,27	89	854	1000	85	206	99.0	104791600	7.8	199.0	2.5	95.2	83.8	99.9	196.3	95.0	0.0	100.0	96.3	93.3	16.6
P17011-001-87	58.1	0.810292	40-60	90-250	22	1,22-1,27	99	1234	1000	96	280	99.3	97952826	5.3	268.0	2.3	98.4	83.9	99.9	296.7	95.1	0.0	100.0	95.2	96.5	59.1
P17011-001-187	43.5	2.78151	40-60	90-250	16.6	1,22-1,27	116	2053	0.710	84	333	99.2	114077224	5.2	328.0	2.5	98.3	85.2	99.9	330.7	96.9	0.0	100.0	95.0	96.8	76.8
P17011-001-90	28	3.52063	40-60	90-250	20.8	1,22-1,27	99	710	1000	84	241	99.1	109803426	7.3	235.0	1.9	97.1	86.5	99.9	227.8	97.3	0.0	100.0	96.2	95.5	39.7
P17011-001-188	43.2	2.79742	40-60	90-250	16.6	1,22-1,27	109	1305	0.999	91	237	99.0	111147772	7.3	234.0	2.7	97.7	85.0	99.9	238.5	96.2	0.0	100.0	96.0	95.7	41.0
P17011-001-92	60	0.253663	40-60	90-250	17.3	1,22-1,27	74	889	1000	96	169	98.5	105511222	10.2	162.0	2.7	89.4	86.0	99.9	172.3	96.9	0.0	100.0	94.2	85.9	12.3
P17011-001-91	28.8	3.62246	40-60	90-250	15.7	1,22-1,27	75	543	1000	82	114	96.6	116335398	15.1	111.0	1.0	67.3	89.4	99.9	116.2	97.7	0.0	100.0	96.0	63.9	1.9
P17011-001-94	53	1.37755	40-60	90-250	12.4	1,22-1,27	83	898	1000	84	143	98.3	110856006	11.9	141.0	3.4	87.6	85.1	99.9	139.2	97.3	0.0	100.0	96.4	85.4	0.9
P17011-001-96	49.1	1.7614	40-60	90-250	12.8	1,22-1,27	76	651	1000	92	155	98.6	101939404	10.8	150.0	2.7	91.8	85.4	99.9	150.2	96.2	0.0	100.0	96.0	87.8	2.8
P17011-001-102	30.9	3.69011	40-60	90-250	16.2	1,22-1,27	114	506	1000	87	255	98.9	116559402	7.1	251.0	0.5	97.0	87.2	99.9	249.9	96.4	0.0	100.0	95.6	95.6	50.7
P17011-001-103	43.3	2.19309	40-60	90-250	13.4	1,22-1,27	90	777	1000	93	182	99.0	106307500	9.6	177.0	2.0	96.1	86.9	99.9	181.8	97.1	0.0	100.0	96.1	92.8	11.4
P17011-001-110	174	0.286525	40-60	90-250	8.73	1,22-1,27	7	875	1000	96	82	87.9	87679650	15.3	77.0	2.6	35.8	86.1	99.9	95.2	96.2	0.0	100.0	90.7	30.7	3.3
P17011-001-111	52	1.16316	40-60	90-250	13	1,22-1,27	62	688	1000	94	146	98.6	107549466	11.7	140.0	2.6	86.2	85.9	99.9	151.1	97.0	0.0	100.0	95.4	81.8	8.3
P17011-001-115	46.8	2.42977	40-60	90-250	8.31	1,22-1,27	95	625	1000	90	213	99.1	85397504	6.3	207.0	2.1	96.2	87.3	99.9	218.0	96.1	0.0	100.0	95.4	93.9	25.3
P17011-001-116	54	0.753829	40-60	90-250	14.6	1,22-1,27	86	785	1000	92	163	98.7	111545942	11.1	158.0	1.8	91.2	85.4	99.9	159.3	97.2	0.0	100.0	96.4	88.7	5.4
P17011-001-117	28.9	2.38654	40-60	90-250	14.6	1,22-1,27	105	705	1000	93	196	98.9	109056180	8.9	191.0	2.3	96.8	84.8	99.9	192.2	96.0	0.0	100.0	96.4	94.5	13.5
P17011-001-118	31	2.67878	40-60	90-250	7.6	1,22-1,27	78	1407	1000	87	146	98.4	92340382	9.6	144.0	2.8	86.9	85.5	99.9	145.9	95.9	0.0	100.0	95.8	84.3	3.2
P17011-001-121	53	1.13085	40-60	90-250	16	1,22-1,27	78	561	1000	101	174	98.6	112439008	10.8	166.0	3.0	89.6	84.5	99.9	177.7	97.2	0.0	100.0	93.9	86.0	15.7
P17011-001-123	22.2	2.13376	40-60	90-250	14.6	1,22-1,27	107	666	1000	95	246	99.3	101560164	7.0	239.0	1.6	96.9	86.3	99.9	238.1	96.4	0.0	100.0	95.4	95.0	43.8
P17011-001-128	4.06	3.6961	40-60	90-250	13.8	1,22-1,27	95	675	1000	84	125	96.9	118229276	14.1	124.0	0.9	73.4	87.9	99.9	126.1	97.2	0.0	100.0	95.6	72.5	2.0
P17011-001-129	23	2.9865	40-60	90-250	12.5	1,22-1,27	95	999	1000	91	173	98.8	103857962	9.5	172.0	2.0	91.8	87.1	99.9	175.9	97.0	0.0	100.0	95.9	89.8	11.0
P17011-001-130	26.9	1.9295	40-60	90-250	12	1,22-1,27	57	375	1000	100	142	97.6	97002486	11.5	134.0	2.6	80.9	84.7	99.9	141.1	97.0	0.0	100.0	94.0	75.8	6.0
P17011-001-132	56	1.24584	40-60	90-250	13.6	1,22-1,27	56	4573	0.000	96	142	97.3	108431904	12.2	137.0	3.0	78.8	84.1	99.9	143.9	96.3	0.1	100.0	93.7	75.0	6.1
P17011-001-133	44.8	1.39287	40-60	90-250	12.3	1,22-1,27	67	717	1000	94	154	98.4	94656714	10.3	148.0	2.7	88.0	85.0	99.9	148.3	96.5	0.0	100.0	95.5	84.3	3.2
P17011-001-140	19.3	3.21713	40-60	90-250	7.88	1,22-1,27	48	607	1000	84	93	94.2	99433292	15.9	92.0	1.7	40.4	87.0	99.9	93.4	96.7	0.0	100.0	96.2	38.6	0.2
P17011-001-141	17.1	1.94317	40-60	90-250	18.9	1,22-1,27	104	911	1000	85	210	99.0	120750620	9.2	204.0	2.5	95.3	85.5	99.9	198.9	97.1	0.0	100.0	95.9	93.0	18.0
P17011-001-142	158	0.371997	40-60	90-250	14	1,22-1,27	42	1063	1000	93	115	96.7	108926012	14.8	109.0	2.9	64.5	84.9	99.9	118.8	96.8	0.0	100.0	94.6	59.2	3.6
P17011-001-144	21.3	4.72377	40-60	90-250	11.8	1,22-1,27	44	3104	0.012	76	86	90.5	123008402	18.7	84.0	0.8	34.0	89.2	99.9	94.4	97.8	0.1	100.0	94.3	33.1	1.3
P17011-001-153	59.2	1.64527	40-60	90-250	18.9	1,22-1,27	86	637	1000	94	236	99.2	94090456	6.7	229.0	2.6	97.3	85.2	99.9	227.5	96.4	0.0	100.0	95.8	95.0	36.3
P17011-001-155	94.4	1.37498	40-60	90-250	17.7	1,22-1,27	88	1158	1000	93	353	99.2	95584526	4.3	341.0	1.6	98.4	84.7	99.9	351.3	97.0	0.0	100.0	94.5	96.7	78.6
P17011-001-154	51	1.68028	40-60	90-250	15.2	1,22-1,27	102	593	1000	93	287	99.1	101009794	5.8	280.0	3.8	98.3	84.5	99.9	285.4	96.8	0.0	100.0	95.4	96.1	65.6
P17011-001-161	30.9	3.73075	40-60	90-250	12.6	1,22-1,27	106	789	1000	88	331	99.0	97522152	4.8	323.0	2.3	98.1	85.7	99.9	312.5	95.0	0.0	100.0	95.2	96.5	77.2
P17011-001-163	50	1.36127	40-60	90-250	18.5	1,22-1,27	109	596	1000	100	342	99.2	98920650	4.6	333.0	1.7	98.5	85.5	99.9	367.1	95.7	0.0	100.0	95.2	97.3	78.6
P17011-001-164	46.7	2.21184	40-60	90-250	14.4	1,22-1,27	100	1921	0.749	95	220	99.0	95684128	7.3	213.0	1.0	96.8	87.6	99.9	218.8	97.1	0.0	100.0	95.9	94.8	31.5
P17011-001-165	40.2	2.25298	40-60	90-250	16.8	1,22-1,27	102	658	1000	94	228	99.1	97653322	6.9	222.0	2.4	97.0	85.7	99.9	222.1	93.6	0.0	100.0	96.3	95.3	32.0
P17011-001-172	53.7	2.6	40-60	90-250	16.2	1,22-1,27	90	709	1000	84	257	99.0	104883146	6.2	250.0	2.0	97.3	84.3	99.9	242.8	95.3	0.0	100.0	95.8	95.6	50.4
P17011-001-167	21.3	3.53493	40-60	90-250	14.3	1,22-1,27	108	592	1000	88	244	99.0	109135892	7.1	238.0	1.5	97.8	87.1	99.9	236.7	96.5	0.0	100.0	96.3	96.1	41.8
P17011-001-168	52	1.39639	40-60	90-250	18.4	1,22-1,27	92	634	1000	101	209	99.2	106262314	8.6	198.0	2.2	97.0	85.8	99.9	212.6	97.2	0.0	100.0	95.9	94.1	27.6
P17011-001-169	19.5	2.34794	40-60	90-250	17.7	1,22-1,27	94	431	1000	95	213	99.0	101031410	8.1	208.0	3.2	96.1	84.9	99.9	204.3	96.2	0.0	100.0	96.4	94.4	19.0
P17011-001-170	35.5	4.03441	40-60	90-250	15	1,22-1,27	112	620	1000	82	317	99.1	108261674	5.3	308.0	0.8	98.1	87.3	99.9	302.4	97.0	0.0	100.0	95.9	96.8	75.4
P17011-001-179	5.29	1.69241	40-60	90-250	23.6	1,22-1,27	119	359	1000	110	590	99.2	109007344	3.2	585.0	0.8	98.6	83.9	99.8	587.1	94.1	0.0	100.0	94.7	97.9	94.1
P17011-001-02	16.4	2.56808	40-60	90-250	14.6	1,22-1,27	119	3863	0.083	91	294	99.4	110297006	5.1	286.0	1.8	98.2	84.8	99.9	339.0	95.3	0.0	100.0	92.1	96.3	60.9
P17011-001-10	7.46	2.88954	40-60	90-250	20.9	1,22-1,27	121	2131	0.979	86	335	99.4	114212442	5.2	323.0	2.2	98.8	85.1	99.9	335.4	97.4	0.0	100.0	96.1	97.6	76.5
P17011-001-13	31.7	1.6	40-60	90-250	11.1	1,22-1,27	79	958	1000	85	201	99.1	89431650	6.5	195.0	4.1	95.4	82.3	99.9	201.4	95.1	0.0	100.0	95.6	92.9	18.1
P17011-001-14	39.4	1.61799	40-60	90-250	18.5	1,22-1,27	48	1026	1000	89	158	96.6	116542460	10.5	145.0	2.0	80.4	85.9	99.9	176.7	97.1	0.0	100.0	88.1	74.9	20.3
P17011-001-17	18.1	2.43232	40-60	90-250	19.1	1,22-1,27	115	642	1000	91	318	99.4	119480112	5.8	308.0	4.1	98.7	83.6	99.9	314.6	91.8	0.0	100.0	95.7	97.1	73.9
P17011-001-18	34.3	2.4711	40-60	90-250	16.3	1,22-1,27	113	1039	1000	84	230	99.2	108907946	7.5	223.0	3.0	96.0	85.6	99.9	221.9	97.4	0.0	100.0	95.8	94.4	33.7
P17011-001-23	52	0.622909	40-60	90-250	21.6	1,22-1,27	97	539	1000	96	262	99.4	101762564	5.7	252.0	2.9	97.9	84.1	99.9	294.5	96.9	0.0	100.0	94.6	96.3	51.3
P17011-001-28	47.3	2.22553	40-60	90-250	16.3	1,22-1,27	78	717	1000	88	208	99.1	102950572	7.8	203.0	3.2	95.8	84.4	99.9	201.3	97.3	0.0	100.0	95.9	93.4	19.0
P17011-001-31	36.6	2.47681	40-60	90-250	15.6	1,22-1,27	80	3944	0.006	86	202	99.1	94750906	6.7	191.0	2.1	93.4	85.5	99.9	216.2	96.8	0.0	100.0	94.0	91.0	27.8
P17011-001-32	25.5	2.54509	40-60	90-250	15.6	1,22-1,27	81	2317	0.974	85	218	99.1	99900322	6.6	212.0	1.8	96.9	83.3	99.9	219.5	96.8	0.0	100.0	96.2	95.0	29.7
P17011-001-34	58	3.87687	40-60	90-250	15.5	1,22-1,27	75	2575	0.564	77	188	98.7	111759594	7.9	186.0	1.7	93.6	86.2	99.9	195.9	96.9	0.0	100.0	95.0	91.3	21.1
P17011-001-35	48.1	0.16	40-60	90-250	17.7	1,22-1,27	96	397	1000	97	423	99.4	89469352	3.1	404.0	1.6	98.9	83.3	99.9	472.1	96.4	0.0	100.0	93.0	97.4	86.7
P17011-001-40	108	1.61072	40-60	90-250	19.4	1,22-1,27	92	4064	0.013	88	235	99.1	104127810	4.5	229.0	1.8	97.3	84.7	99.9	357.7	93.4	0.1	100.0	86.7	95.2	42.0
P17011-001-42	120	1.19134	40-60	90-250	18.3	1,22-1,27	88	2482	0.690	92	226	99.3	103585732	6.6	219.0	3.1	97.6	82.5	99.9	244.8	95.8	0.0	100.0	95.3	95.1	34.9
P17011-001-49	45.3	2.56419	40-60	90-250	18.6	1,22-1,27	82	917	1000	89	248	99.2	109385960	6.9	240.0	2.0	96.5	84.4	99.9	245.8	97.0	0.0	100.0	94.1	94.0	44.6
P17011-001-52	87.3	1.32624	40-60	90-250	5.78	1,22-1,27	63	1506	0.998	87	234	99.1	65623070	4.1	226.0	2.1	96.0	84.5	99.9	238.3	92.6	0.0	100.0	93.7	93.2	40.8
P17011-001-55	9.67	3.87342	40-60	90-250	25	1,22-1,27	95	696	1000	85	247	99.3	104977552	6.7	240.0	0.7	97.5	85.9	99.9	236.5	96.8	0.0	100.0	96.3	95.8	43.8
P17011-001-58	55	2.92127	40-60	90-250	12.6	1,22-1,27	81	734	1000	82	208	99.0	95294010	7.0	201.0	1.1	95.3	85.4	99.9	196.9	96.7	0.0	100.0	95.8	92.8	16.5
P17011-001-59	66.8	1.35876	40-60	90-250	20.9	1,22-1,27	104	622	1000	92	510	99.5	105679690	3.1	489.0	1.6	99.2	82.9	99.9	524.0	96.6	0.0	100.0	94.7	98.0	92.2
P17011-001-62	99	2.01456	40-60	90-250	9.96	1,22-1,27	78	1406	0.998	84	239	99.2	91338678	5.5	231.0	2.0	97.5	83.6	99.9	235.4	94.8	0.0	100.0	95.9	95.4	38.9
P17011-001-66	92.9	1.28937	40-60	90-250	7.8	1,22-1,27	82	737	1000	88	272	99.1	74967030	4.2	265.0	3.0	97.9	84.3	99.9	273.1	95.2	0.0	100.0	95.1	95.8	58.8
P17011-001-30	179	1.34678	40-60	90-250	15.9	1,22-1,27	81	785	1000	89	189	99.0	98106380	7.9	184.0	2.4	94.4	83.0	99.9	185.8	95.0	0.0	100.0	96.0	92.1	11.5
P17011-001-68	17.3	3.38234	40-60	90-250	25.5	1,22-1,27	94	1570	0.999	87	309	99.5	108946896	5.5	297.0	1.3	98.7	86.7	99.9	309.4	97.9	0.0	100.0	95.5	96.9	71.3
P17011-001-70	60	3.04552	40-60	90-250	18	1,22-1,27	97	886	1000	78	244	99.0	107061626	6.3	238.0	1.8	96.9	83.2	99.9	231.4	96.3	0.0	100.0	95.6	94.9	42.4
P17011-001-74	50	1.86243	40-60	90-250	18	1,22-1,27	86	2043	0.618	91	235	99.1	99874462	6.6	223.0	2.3	96.1	84.2	99.9	238.2	96.9	0.0	100.0	94.1	93.5	38.7
P17011-001-78	54.3	2.81125	40-60	90-250	20	1,22-1,27	99	627	1000	89	346	99.3	98695282	4.7	333.0	1.4	98.6	85.0	99.9	326.2	97.1	0.0	100.0	95.4	96.9	79.3
P17011-001-85	45.6	2.56299	40-60	90-250	17.7	1,22-1,27	94	1249	0.999	92	230	99.1	98291026	6.9	226.0	2.0	96.4	84.8	99.9	225.6	97.2	0.0	100.0	95.5	94.5	35.5
P17011-001-88	10.4	5.1	40-60	90-250	13.7	1,22-1,27	81	834	1000	80	151	98.5	89196374	8.9	148.0	0.9	87.6	88.4	99.9	149.2	97.6	0.0	100.0	95.9	85.2	3.6
P17011-001-89	52.4	0.783639	40-60	90-250	16	1,22-1,27	104	767	1000	86	318	99.5	100464910	4.1	309.0	2.0	98.7	79.5	99.9	350.5	96.2	0.0	100.0	95.1	97.7	75.7
P17011-001-97	27.9	2.44	40-60	90-250	16.3	1,22-1,27	80	1006	1000	94	285	99.3	98068868	5.4	275.0	1.1	98.1	84.1	99.9	284.6	95.4	0.0	100.0	95.0	96.1	62.9
P17011-001-98	12.1	2.81767	40-60	90-250	17.7	1,22-1,27	93	1144	1000	91	411	99.4	108748882	4.1	394.0	0.6	98.9	83.1	99.9	404.4	95.8	0.0	100.0	94.9	97.4	85.8

## Sheet: OTML N=104
Supplementary Table S8-B. Quality control parameters and library generation data of OTML (N=104)
#ID	Stock concentration (ng/µl)	Amplification cycles compared to quality control	Reads	Mean Read length	Exonics bases with Coverage	Mean Coverage Depth	Uniformity	Deamination
P17011-001-02	16.4	2.56808	13,222,277	107	1183046	868.1	93.42%	5
P17011-001-03	53.3	1.91185	12,808,986	107	1191010	845.5	96.01%	7
P17011-001-05	42.5	1.61857	11,130,176	107	1191173	730.6	96.46%	5
P17011-001-09	7.62	3.53333	13,186,651	102	1183296	826.3	92.84%	85
P17011-001-10	7.46	2.88954	10,082,762	104	1182512	646.1	94.96%	18
P17011-001-103	43.3	2.19309	11,551,866	106	1185184	751.1	94.78%	6
P17011-001-110	174	0.286525	6,737,764	108	1185919	447.1	96.81%	7
P17011-001-111	52	1.16316	7,414,570	109	1183520	493.7	96.58%	0
P17011-001-115	46.8	2.42977	10,200,950	108	1182999	669.8	95.08%	3
P17011-001-116	54	0.753829	7,085,988	107	1181610	463.6	95.95%	3
P17011-001-117	28.9	2.38654	9,506,400	107	1178226	619.9	0.9484	1
P17011-001-118	31	2.67878	8,409,361	104	1175327	542.4	94.88%	4
P17011-001-121	53	1.13085	6,717,531	109	1179835	448.6	96.25%	0
P17011-001-123	22.2	2.13376	10,828,746	107	1189861	707.1	96.65%	2
P17011-001-128	4.06	3.6961	15,059,628	106	1182716	980.4	92.23%	9
P17011-001-129	23	2.9865	10,599,758	109	1179431	702.7	93.76%	9
P17011-001-13	31.7	1.6	11,236,301	109	1191167	751.3	96.58%	4
P17011-001-130	26.9	1.9295	9,974,059	107	1183630	655	95.35%	9
P17011-001-132	56	1.24584	7,181,905	109	1184338	479	96.41%	3
P17011-001-133	44.8	1.39287	1,1174,099	107	1187895	730.7	96.16%	4
P17011-001-14	39.4	1.61799	11,154,602	109	1192779	749.8	96.77%	2
P17011-001-140	19.3	3.21713	9,852,815	105	1170379	631.7	92.38%	29
P17011-001-141	17.1	1.94317	1,0679,790	107	1189821	703	96.52%	0
P17011-001-142	158	0.371997	6,962,980	107	1183354	458.1	95.6%	4
P17011-001-144	21.3	4.72377	6,944,577	102	1168306	434.8	93.55%	527
P17011-001-153	59.2	1.64527	12,720,509	108	1191756	842.5	96.45%	0
P17011-001-154	51	1.68028	9,918,307	108	1189669	652.4	97.16%	3
P17011-001-155	94.4	1.37498	10,290,829	109	1189280	688.6	96.52%	4
P17011-001-161	30.9	3.73075	9,478,156	106	1183547	613.5	95.96%	3
P17011-001-163	50	1.36127	1,0422,946	109	1185911	691.5	96.08%	2
P17011-001-164	46.7	2.21184	10,978,447	106	1186705	713.4	95.77%	2
P17011-001-165	40.2	2.25298	11,520,054	107	1187737	753.7	95.57%	13
P17011-001-167	21.3	3.53493	11,398,617	106	1173676	735.6	91.91%	17
P17011-001-168	52	1.39639	8,759,252	109	1175285	584.2	94.19%	0
P17011-001-17	18.1	2.43232	10,752,950	106	1178842	695.3	93.25%	1
P17011-001-170	35.5	4.03441	7,413,025	105	1175819	476.8	95.19%	133
P17011-001-171	11	5.45	5,535,319	99	1135910	340.4	91.95%	672
P17011-001-172	53.7	2.6	10,723,361	106	1189296	698.7	96.38%	6
P17011-001-179	5.29	1.69241	14,576,791	107	1134782	952.3	83.16%	5
P17011-001-18	34.3	2.4711	10,360,268	106	1185203	675.2	95.52%	9
P17011-001-180	45.1	3.03176	9103434	105	1188659	585.6	96.29%	22
P17011-001-182	43	1.44991	11,166,514	106	1190701	727.8	96.5%	4
P17011-001-185	49.3	1.70672	10,250,333	108	1188989	680.5	96.81%	1
P17011-001-186	20.9	3.23829	10,008,177	105	1189913	646.4	96.57%	5
P17011-001-187	43.5	2.78151	10,022,728	105	1189285	644.6	96.13%	25
P17011-001-188	43.2	2.79742	10,693,697	105	1181118	690.2	94.17%	14
P17011-001-198	45.3	2.22884	10,216,596	105	1189860	660.7	96.71%	7
P17011-001-21	21.3	3.25	11,927,128	103	1182356	758.2	93.94%	11
P17011-001-22	19.7	4.69965	7,927,898	103	1146652	500.8	90.45%	199
P17011-001-23	52	0.622909	9,564,750	107	1188217	626.2	96.64%	0
P17011-001-25	56.5	1.24765	11,464,606	107	1192636	753.4	96.63%	8
P17011-001-26	46.9	2.10043	9,053,403	107	1188288	594.7	96.2%	5
P17011-001-28	47.3	2.22553	1,0062,900	107	1182851	656.5	95.41%	4
P17011-001-29	42.1	1.85464	12,189,344	106	1192840	793.2	96.63%	3
P17011-001-30	179	1.34678	9,795,120	109	1190362	651.1	96.98%	1
P17011-001-31	36.6	2.47681	10,415,802	106	1188995	681.3	95.89%	9
P17011-001-32	25.5	2.54509	14,187,494	106	1194192	920	96.32%	6
P17011-001-33	24.7	2.66	13,427,441	107	1194014	877.9	96.69%	2
P17011-001-34	58	3.87687	6,752,965	104	1166070	429.4	93.97%	92
P17011-001-35	48.1	0.16	9,366,801	109	1189285	623.5	96.89%	8
P17011-001-40	108	1.61072	10,421,289	108	1188747	690.2	95.91%	3
P17011-001-41	27.1	1.7172	9,738,265	107	1177033	637.6	93.15%	2
P17011-001-42	120	1.19134	11,149,522	109	1191572	744.5	97.02%	1
P17011-001-44	52	0.927442	9,737,518	107	1186968	635.2	96.48%	0
P17011-001-46	39.3	1.57959	11,545,942	108	1190918	771.8	96.73%	1
P17011-001-47	74	1.32599	9,869,297	108	1186768	652.9	96.15%	0
P17011-001-48	286	1.55848	12,131,760	110	1193765	816.12	96.72%	2
P17011-001-49	45.3	2.56419	9,504,563	107	1185362	624.1	95.63%	2
P17011-001-50	42.4	4.92	8,446,919	104	1172505	534.6	93.38%	186
P17011-001-52	87.3	1.32624	10,348,863	108	1190889	684.5	96.85%	1
P17011-001-53	41.3	1.46885	11,071,215	108	1188713	733	96.16%	3
P17011-001-54	91	1.28974	10,347,670	107	1191598	681.94	97.12%	0
P17011-001-55	9.67	3.87342	12,820,565	103	1193095	812.7	96.83%	17
P17011-001-57	99.2	1.44587	10,480,017	110	1189854	706.3	96655	2
P17011-001-58	55	2.92127	10,072,755	106	1190322	658.4	95.69%	20
P17011-001-59	66.8	1.35876	9,395,352	108	1188181	621.7	96.56%	3
P17011-001-60	35.9	1.84243	11,232,598	109	1189252	750.4	96.25%	1
P17011-001-61	185	1.23374	9,351,811	108	1190675	624	96.54%	1
P17011-001-62	99	2.01456	9,280,831	107	1189423	610.6	96.39%	4
P17011-001-64	49.3	2.16247	9,957,020	106	1193330	666.1	97.27%	3
P17011-001-66	92.9	1.28937	9,781,079	106	1190003	633.3	96.93%	5
P17011-001-67	75.5	0.724204	10,352,752	108	1189822	688	96.8%	1
P17011-001-68	17.3	3.38234	10,592,784	106	1189522	687.5	96.41%	8
P17011-001-70	60	3.04552	8,649,684	106	1187004	560.6	95.38%	27
P17011-001-74	50	1.86243	10,354,093	107	1190791	682.4	96.61%	1
P17011-001-75	31.8	3.02	10,620,878	106	1189179	689.9	96.3%	8
P17011-001-77	22.8	5.4	5,255,176	102	1123881	331.3	90.49%	695
P17011-001-78	54.3	2.81125	9,808,900	107	1186805	643.1	96.08%	3
P17011-001-79	31.4	2.48	10,934,173	105	1183006	708.5	94.96%	6
P17011-001-81	36.7	2.62355	11,295,067	106	1190405	732.6	96.35%	3
P17011-001-82	43.8	2.68428	11,505,042	106	1189442	751.5	96.05%	7
P17011-001-83	40.7	2.70566	10,970,014	107	1188223	718	95.7%	7
P17011-001-85	45.6	2.56299	10,249,995	108	1182319	676.6	94.64%	7
P17011-001-86	77	1.87376	9,502,037	106	1189682	616.9	97.14%	5
P17011-001-87	58.1	0.810292	9,999,003	106	1187465	661.3	96.35%	4
P17011-001-88	10.4	5.1	5,589,970	104	1165746	357	95.33%	422
P17011-001-89	52.4	0.783639	10,170,088	108	1191065	672.7	95.94%	3
P17011-001-90	28	3.52063	12,918,872	105	1191673	828.4	96.63%	7
P17011-001-91	28.8	3.62246	9,208,774	106	1181000	597.8	95.39%	69
P17011-001-92	60	0.253663	5,599,560	108	1179082	372.2	96.72%	1
P17011-001-94	53	1.37755	7,247,680	109	1183355	484.4	95.99%	3
P17011-001-96	49.1	1.7614	9,686,593	107	1182982	635.9	95.42%	2
P17011-001-97	27.9	2.44	15,227,684	107	1196039	1001.9	97.3%	1
P17011-001-98	12.1	2.81767	15,254,740	106	1190922	996.2	96.31%	4

## Sheet: FO N=110
Supplementary Table S8-C. Quality control parameters and library generation data of FO/F1CDx (N=110)
#ID	Tumor cellularity (%)	Median exon coverage (X)	Reduced sensitivity due to sample quality
P17011-001-09	60	459	Yes
P17011-001-05	90	935	No
P17011-001-21	60	650	No
P17011-001-22	90	438	Yes
P17011-001-25	90	926	No
P17011-001-29	70	734	No
P17011-001-41	90	910	No
P17011-001-44	90	830	No
P17011-001-45	90	896	Yes
P17011-001-46	90	982	No
P17011-001-47	90	922	No
P17011-001-48	100	910	No
P17011-001-54	90	995	No
P17011-001-57	70	665	No
P17011-001-180	100	718	No
P17011-001-60	70	624	No
P17011-001-61	80	1019	No
P17011-001-182	40	750	No
P17011-001-64	50	974	No
P17011-001-198	50	690	No
P17011-001-03	90	819	No
P17011-001-26	80	835	No
P17011-001-53	80	827	No
P17011-001-67	90	845	No
P17011-001-72	80	904	Yes
P17011-001-75	90	827	No
P17011-001-185	80	717	No
P17011-001-79	70	672	No
P17011-001-81	80	712	No
P17011-001-82	90	731	No
P17011-001-186	60	709	No
P17011-001-83	70	664	No
P17011-001-86	90	737	No
P17011-001-87	80	895	No
P17011-001-187	80	606	No
P17011-001-90	90	653	Yes
P17011-001-188	80	543	No
P17011-001-92	80	727	No
P17011-001-91	70	332	Yes
P17011-001-94	80	833	No
P17011-001-96	95	795	No
P17011-001-102	90	469	Yes
P17011-001-103	70	807	No
P17011-001-110	60	843	No
P17011-001-111	70	738	No
P17011-001-115	50	616	No
P17011-001-116	50	774	No
P17011-001-117	60	682	Yes
P17011-001-118	70	637	No
P17011-001-121	30	787	No
P17011-001-123	40	783	No
P17011-001-128	70	257	Yes
P17011-001-129	70	550	No
P17011-001-130	90	855	No
P17011-001-132	90	892	No
P17011-001-133	90	881	Yes
P17011-001-140	70	296	No
P17011-001-141	50	875	Yes
P17011-001-142	80	886	No
P17011-001-144	95	238	Yes
P17011-001-153	70	939	No
P17011-001-155	70	749	No
P17011-001-154	95	738	No
P17011-001-161	40	491	Yes
P17011-001-163	60	713	No
P17011-001-164	90	677	No
P17011-001-165	90	763	No
P17011-001-172	70	791	Yes
P17011-001-167	60	366	Yes
P17011-001-168	90	773	No
P17011-001-169	15	703	Yes
P17011-001-170	60	647	Yes
P17011-001-171	90	382	No
P17011-001-179	70	752	Yes
P17011-001-02	70	625	No
P17011-001-10	60	514	No
P17011-001-13	30	646	No
P17011-001-14	60	786	No
P17011-001-17	5	430	Yes
P17011-001-18	60	553	No
P17011-001-23	80	756	No
P17011-001-28	60	622	No
P17011-001-31	90	530	No
P17011-001-32	60	683	No
P17011-001-33	90	590	No
P17011-001-34	90	509	No
P17011-001-35	90	752	No
P17011-001-40	80	624	No
P17011-001-42	60	887	No
P17011-001-43	90	889	Yes
P17011-001-49	90	788	No
P17011-001-50	70	371	No
P17011-001-52	90	750	No
P17011-001-55	90	437	Yes
P17011-001-58	90	616	No
P17011-001-59	90	944	No
P17011-001-62	90	660	No
P17011-001-66	70	837	No
P17011-001-27	40	955	Yes
P17011-001-30	80	899	No
P17011-001-68	70	708	No
P17011-001-70	50	581	No
P17011-001-74	90	979	No
P17011-001-77	80	422	No
P17011-001-78	80	704	Yes
P17011-001-85	80	649	No
P17011-001-88	50	485	No
P17011-001-89	60	817	Yes
P17011-001-97	70	716	No
P17011-001-98	90	682	Yes

## Sheet: TSO500 reproducibility N = 21
Supplementary Table S8-D. Quality control parameters and library generation data of inter-institutions reproducibility assay for TSO500 (N=21)
#ID	Stock concentration (ng/µl)	Amplification cycles compared to quality control	DNA input (ng)	Sheared fragment size (bp)	Library concentration prior to normalization (ng/µl)	Coding region size (Megabases)	Usable MSI Sites	Contamination score	Chromosomal imbalance	Median insert size (bp)	Median Exon coverage	Percentage Exon 50X	Total PF Reads	Mean family size	Median target coverage	Percentage of chimeric reads	Percentage Exon 100X	Percentage of read enrichment	Percentage of usable UMI reads	Mean target coverage	Percentage of aligned reads	Percentage of contamination	Percentage of PF UQ reads	Percentage of target 0,4X mean	Percentage of target 100X	Percentage of target 250X
P17011-001-29	42.1	1.85464	60	90-250	28.1	1,22-1,27	81	875	1000	84	349	99.5	112312072	4.7	327.0	2.4	98.6	84.0	99.9	363.3	97.4	0.0	100.0	93.1	96.7	74.1
P17011-001-41	27.1	1.7172	60	90-250	22.5	1,22-1,27	75	316	1000	93	331	99.4	110008854	4.8	319.0	1.0	98.4	80.7	99.9	336.6	91.1	0.0	100.0	93.9	96.4	71.3
P17011-001-44	52	0.927442	60	90-250	19.9	1,22-1,27	60	649	1000	89	258	99.3	93149136	5.2	235.0	2.9	95.9	82.4	99.9	273.2	93.7	0.0	100.0	91.7	93.4	46.1
P17011-001-46	39.3	1.57959	60	90-250	25.8	1,22-1,27	100	681	1000	90	315	99.5	114981800	5.2	304.0	5.8	98.8	78.2	99.9	333.6	96.2	0.0	100.0	95.0	97.1	72.3
P17011-001-48	286	1.55848	60	90-250	14.5	1,22-1,27	7	938	0.983	91	78	83.5	90693330	17.0	74.0	4.2	28.2	81.8	99.9	82.9	97.2	0.1	100.0	92.4	24.6	0.9
P17011-001-54	91	1.28974	60	90-250	24.5	1,22-1,27	104	571	1000	93	308	99.5	93197434	4.7	296.0	2.8	98.7	83.5	99.9	317.4	96.5	0.0	100.0	95.3	97.0	68.9
P17011-001-64	49.3	2.16247	60	90-250	25.8	1,22-1,27	115	525	1000	93	631	99.6	103847396	2.7	602.0	1.8	99.4	83.6	99.9	628.5	97.2	0.0	100.0	94.1	98.1	94.2
P17011-001-198	45.3	2.22884	60	90-250	17.2	1,22-1,27	53	1087	1000	79	387	99.3	104816316	3.8	371.0	2.9	98.5	79.4	99.9	365.9	95.9	0.0	100.0	93.7	96.5	80.3
P17011-001-53	41.3	1.46885	60	90-250	21.1	1,22-1,27	109	850	1000	94	326	99.5	103611822	5.1	318.0	3.4	99.0	81.6	99.9	324.9	96.5	0.0	100.0	96.4	97.7	79.0
P17011-001-185	49.3	1.70672	60	90-250	20	1,22-1,27	108	640	1000	93	612	99.5	94943602	2.2	588.0	2.3	99.3	75.9	99.9	606.4	90.2	0.0	100.0	94.7	97.8	94.5
P17011-001-82	43.8	2.68428	60	90-250	20.9	1,22-1,27	111	728	1000	89	295	99.4	103485370	5.3	288.0	1.9	98.8	81.9	99.9	283.0	94.0	0.0	100.0	96.7	97.2	70.1
P17011-001-83	40.7	2.70566	60	90-250	27.9	1,22-1,27	122	701	1000	93	399	99.5	115042230	4.4	391.0	1.0	99.1	82.5	99.9	398.3	96.2	0.0	100.0	95.9	98.0	88.1
P17011-001-86	77	1.87376	60	90-250	20.6	1,22-1,27	106	718	1000	86	446	99.5	108474286	3.6	431.0	1.4	99.2	80.8	99.9	426.1	93.5	0.0	100.0	95.9	98.0	89.8
P17011-001-188	43.2	2.79742	60	90-250	28.2	1,22-1,27	120	1008	1000	93	428	99.5	105383046	3.1	423.0	1.7	99.1	72.9	99.9	433.0	91.1	0.0	100.0	96.0	97.6	91.5
P17011-001-92	60	0.253663	60	90-250	21.3	1,22-1,27	119	599	1000	99	661	99.6	105991342	2.7	642.0	1.1	99.3	82.9	99.9	647.8	96.5	0.0	100.0	95.0	98.3	95.3
P17011-001-118	31	2.67878	60	90-250	21.1	1,22-1,27	100	1067	1000	94	245	99.3	104187472	7.0	242.0	1.8	98.2	85.3	99.9	245.7	98.0	0.0	100.0	96.3	96.2	45.7
P17011-001-123	22.2	2.13376	60	90-250	26.4	1,22-1,27	116	653	1000	96	551	99.5	112097040	3.5	541.0	0.7	99.3	84.9	99.9	531.7	97.0	0.0	100.0	94.9	98.0	92.7
P17011-001-142	158	0.371997	60	90-250	21.7	1,22-1,27	97	1302	1000	96	327	99.5	101016092	4.6	312.0	1.0	99.0	81.7	99.9	332.2	93.0	0.0	100.0	95.4	97.0	73.2
P17011-001-154	51	1.68028	60	90-250	24.5	1,22-1,27	118	584	1000	101	634	99.6	95189894	2.3	615.0	3.0	99.4	77.1	99.8	636.3	92.8	0.0	100.0	95.0	97.9	95.1
P17011-001-163	50	1.36127	60	90-250	29.3	1,22-1,27	118	610	1000	101	803	99.6	106854644	2.1	784.0	0.8	99.3	80.2	99.8	852.6	95.2	0.0	100.0	94.2	98.4	96.4
P17011-001-23	52	0.622909	60	90-250	20.5	1,22-1,27	104	780	1000	93	402	99.6	93361338	3.1	386.0	3.1	99.2	78.6	99.9	440.2	92.9	0.0	100.0	94.2	97.9	86.9

## Sheet: OTML reproducibility N = 23
Supplementary Table S8-E. Quality control parameters and library generation data of inter-institutions reproducibility assay for OTML (N=23)
#ID	Stock concentration (ng/µl)	Amplification cycles compared to quality control	Reads	Mean Read length	Exonics bases with Coverage	Mean Coverage Depth	Uniformity	Deamination	Observations	QC
P17011-001-25	56.5	1.24765	14,796,771	109	1189200	921.4	95.95%	6		Pass
P17011-001-57	99.2	1.44587	10,285,694	113	1184329	665.4	96.02%	2		Pass
P17011-001-61	185	1.23374	10,241,341	111	1180564	651.6	94.65%	3		Pass
P17011-001-67	75.5	0.724204	10,029,346	111	1178797	638.4	94.98%	4		Pass
P17011-001-75	31.8	3.02	9,333,958	107	1172985	576.6	93.87%	7		Pass
P17011-001-79	31.4	2.48	9,384,141	109	1175094	589.4	94.99%	8		Pass
P17011-001-87	58.1	0.810292	10,650,672	111	1182551	673.7	95.78%	3		Pass
P17011-001-94	53	1.37755	8,035,309	98	1087004	513.5	70.79%	16	Low uniformity	Pass
P17011-001-96	49.1	1.7614	8,690,274	108	1166150	539.6	93.12%	0		Pass
P17011-001-103	43.3	2.19309	7,587,863	108	1157516	472.8	92.42%	7		Pass
P17011-001-110	174	0.286525	8,122,817	114	1179398	519.3	96.13%	8		Pass
P17011-001-111	52	1.16316	8,130,733	112	1176668	515.6	95.93%	4		Pass
P17011-001-115	46.8	2.42977	14,146,182	109	1180952	882.1	93.79%	3		Pass
P17011-001-116	54	0.753829	12,860,551	110	1185722	815.4	95.64%	3		Pass
P17011-001-129	23	2.9865	7,270,192	111	1163780	454.7	94.25%	45		Pass
P17011-001-133	44.8	1.39287	9,003,089	109	1173117	565.4	94.57%	5		Pass
P17011-001-140	19.3	3.21713	8,545,825	105	1161674	512.1	92.56%	126	High deamination	Pass
P17011-001-141	17.1	1.94317	6,902,020	109	1178074	442.3	95.96%	20		Pass
P17011-001-161	30.9	3.73075	7,130,248	108	1143267	441.7	91.07%	17		Pass
P17011-001-164	46.7	2.21184	7,719,013	111	1164811	487.7	93.96%	6		Pass
P17011-001-165	40.2	2.25298	7,615,154	110	1165648	486.2	94.23%	8		Pass
P17011-001-167	21.3	3.53493	6,717,046	105	1129205	405	90.19%	39		Pass
P17011-001-18	34.3	2.4711	4,739,441	108	1102007	293.1	90.52%	34	Low coverage	Pass
					Mean Coverage Depth should be higher than 300
					Uniformity should be higher than 80%
					Exclusion criteria: two of the above parameters or high deamination in both reproducibility assays
